# Supplementary material
Source: PubMed Central journal article supplement (PMC6193486)
Supplement: NIHMS1507285-supplement-Supplement1.pdf [file NIHMS1507285-supplement-Supplement1.pdf]

## Supplementary Appendix

This appendix has been provided by the authors to give readers additional information about their work.

Supplement to: Johnston SC, Easton JD, Farrant M, et al. Clopidogrel and aspirin in acute ischemic stroke and high-risk TIA. *N Engl J Med* 2018;379:215-25. DOI: 10.1056/NEJMoa1800410

(PDF last updated August 2, 2018)

**NEJM 18-00410**  
**Supplementary Appendix**

**CLOPIDOGREL COMBINED WITH ASPIRIN VERSUS ASPIRIN ALONE  
 IN ACUTE ISCHEMIC STROKE AND TRANSIENT ISCHEMIC ATTACK**

**Table of Contents**

This supplement contains the following items:

|                                                                                                                                                                   | <b>Page</b> |
|-------------------------------------------------------------------------------------------------------------------------------------------------------------------|-------------|
| Complete listing of committees and coordinating centers in the POINT Trial                                                                                        | 3           |
| Complete listing of investigators, contributors and participating sites in the POINT Trial                                                                        | 4           |
| Summary of Deliberations by the POINT DSMB for Stopping the POINT Trial Early                                                                                     | 41          |
| <b>Table S1.</b> Summary of serious adverse events by MedDRA body system, excluding components of the primary efficacy outcome measure, by intention to treat     | 43          |
| <b>Table S2.</b> Summary of serious adverse events by MedDRA body system, excluding components of the primary efficacy outcome measure, in an as-treated analysis | 44          |
| <b>Table S3.</b> Frequency of study drug discontinuation by reason                                                                                                | 45          |
| <b>Table S4.</b> Efficacy and Safety Stratified by Time Period                                                                                                    | 46          |
| <b>Table S5.</b> Additional Baseline Characteristics of the Participants                                                                                          | 47          |
| <b>Table S6.</b> Pre-specified Secondary and Tertiary Analyses                                                                                                    | 48          |

## **POINT Trial: Committees and Coordinating Centers**

In addition to the authors, the following individuals contributed to the POINT Trial:

### **Executive Committee**

S. Claiborne Johnston, MD, PhD, J. Donald Easton, MD, Anthony S. Kim, MD, MAS, Mary Farrant, MBA, Yuko Palesch, PhD, Jordan Elm, PhD, William Barsan, MD, Anne Lindblad, PhD, Robin Conwit, MD, Scott Janis, PhD.

### **Advisory Committee**

S. Claiborne Johnston, MD, PhD, J. Donald Easton, MD, Anthony S. Kim, MD, MAS, Mary Farrant, MBA, Yuko Palesch, PhD, Jordan Elm, PhD, Holly Tillman, MS, Catherine Dillon, MS, William Barsan, MD, Renee Kasperek-Wynn, RN, BSN, Valerie Stevenson, BAS, RRT, CCRP, Lewis Morgenstern, MD, Anne Lindblad, PhD, Carolyn Burke, Lahna Jones, Kimberly Vogan, Robin Conwit, MD, Scott Janis, PhD.

### **Data and Safety Monitoring Board**

Gregory J. del Zoppo, MD, Robert Cote, MD, Misha Eliasziw, PhD, Pierre Fayad, MD, FAHA, FAAN, Ann M. Lowe, MD, Ileana L. Piña, MD, MPH, Julie A. Swain, MD.

### **Clinical Event Adjudication Committee**

Eric Adelman, MD, Brian Scott, MD, David Bach, MD, Claire S. Duvernoy, MD, Kevin A. Kerber, MD, Deborah A. Levine, MD, MPH, Matthew T. Lorincz, MD, PhD. Darin B. Zahuranec, MD.

### **National Institutes of Health**

Scott Janis, PhD, Robin Conwit, MD.

### **NETT Clinical Coordinating Center**

William Barsan, MD, Joy Black, BSN, RN, MS, Renee Kasperek-Wynn, RN, BSN, Robert Silbergleit, MD, Mickie Speers, BSN, Valerie Stevenson BAS, RRT, CCRP, Carol Van Huysen, BS, CCRP. Tess Bonham,BS, Andrace DeYampert, MSHS, CCRP, Shirley Frederikson, RN, MS, Samkeliso Mawocha, MS, CCRP, CCRA, Gina Neshewat, MPH, CCRP.

### **Data Coordination Unit/Department of Public Health Sciences (MUSC)**

Jordan Elm, PhD, Catherine R. Dillon, MS, Faria Khattak, MPH, Yuko Palesch, PhD, Kavita Patel, BS, Keith Pauls, BS, Logan Sirlane, MPH, Holly Tillman, MS, Wenle Zhao, PhD. Cassidy Conner, MS, Adam Henry, MPH, Aaron Perlmutter, MPH, MSW.

### **POINT Clinical Coordinating Center (UCSF)**

Mary Farrant, BSN, MBA, Karla G. Zurita, AB, CCRP. Trese Biagini, BA, MA, MSN, ANCC, Marcos T. Contreras, PharmD, Caitlin Glennon, BA.

### **Clinical Research Collaboration (EMMES)**

Anne Lindblad, PhD, Carolyn Burke, Kimberly Vogan, Lahna Jones, Sydney Avveduti, Elizabeth Hebert, Cathryn Luther-Lemmon, Rebecca Morgan, Kelley Rosborough; Carolyn Luce, Sharp Clinical Services; Shelley McKenna, Culzean Consulting; Maria Elena Lozano, Synteract, Inc.; Sandra Petrolo, Neuroscience Trials Australia.

## CLINICAL RESEARCH COLLABORATION (CRC) INVESTIGATORS

### AUSTRALIA

**Country Lead:** Christopher LEVI

| Site                     | Role                   | Team Member                                                                                                                                                                                                                                     |
|--------------------------|------------------------|-------------------------------------------------------------------------------------------------------------------------------------------------------------------------------------------------------------------------------------------------|
| Austin Hospital          | Principal Investigator | Vincent THIJS                                                                                                                                                                                                                                   |
|                          | Co-Investigator(s)     | Amy BRODTMANN, Marion SIMPSON                                                                                                                                                                                                                   |
|                          | Study Coordinator(s)   | Dennis YOUNG                                                                                                                                                                                                                                    |
| Box Hill Hospital        | Principal Investigator | Chris BLADIN                                                                                                                                                                                                                                    |
|                          | Co-Investigator(s)     | Jill CAMERON, Philip CHOI, Skye COOTE, Helen DEWEY, Amanda GILLIGAN, Sarah LEE, Claire MULLER, Poh SIEN LOH, Gabrielle TSE, Wenwen ZHANG                                                                                                        |
|                          | Study Coordinator(s)   | Zofia ROSS, Grace THOMAS                                                                                                                                                                                                                        |
| Footscray Hospital       | Principal Investigator | Tissa WIJERATNE                                                                                                                                                                                                                                 |
|                          | Co-Investigator(s)     | Jennifer GOFF, Elizabeth MACKEY                                                                                                                                                                                                                 |
|                          | Study Coordinator(s)   | Sherisse CELESTINO, Essie LOW                                                                                                                                                                                                                   |
| Gosford Hospital         | Principal Investigator | Bill O'BRIEN                                                                                                                                                                                                                                    |
|                          | Co-Investigator(s)     | Patricia CARUANA, Denis CRIMMINS, James W. EVANS, Penelope GORDON, Yun HWANG, Tejas PATEL, Nathan PAVEY, Elizabeth REYNEKE, Alexis SELBY, Jonathan STURM, Scott WHYTE, Stephen WINTERS                                                          |
|                          | Study Coordinator(s)   | Deborah ALCHIN, Susanne RHODES                                                                                                                                                                                                                  |
| John Hunter Hospital     | Principal Investigator | Chris LEVI, Neil SPRATT                                                                                                                                                                                                                         |
|                          | Co-Investigator(s)     | Timothy ANG, Jelle DEMEESTERE, Carlos ESPERON, Venkatesh KRISHNAMURTHY, Chris LEVI, Andre LOISELLE, Fredi MITEFF, Mark PARSONS, Ronak PATEL                                                                                                     |
|                          | Study Coordinator(s)   | Terri HAINES, Erin KERR, Gemma KITSOS                                                                                                                                                                                                           |
| Monash Medical Centre    | Principal Investigator | Thanh PHAN                                                                                                                                                                                                                                      |
|                          | Co-Investigator(s)     | Benjamin CLISSOLD, John LY, Henry MA                                                                                                                                                                                                            |
|                          | Study Coordinator(s)   | Kitty WONG, Dennis YOUNG                                                                                                                                                                                                                        |
| Royal Adelaide Hospital  | Principal Investigator | Timothy KLEINIG                                                                                                                                                                                                                                 |
|                          | Co-Investigator(s)     | Edmund CHEONG, Craig KURUNAWAI                                                                                                                                                                                                                  |
|                          | Study Coordinator(s)   | Jennifer CRANEFIELD                                                                                                                                                                                                                             |
| Royal Melbourne Hospital | Principal Investigator | Stephen DAVIS                                                                                                                                                                                                                                   |
|                          | Co-Investigator(s)     | Bruce CAMPBELL, Arvind CHANDRATHEVA, Thanuja DHARMADASA, Lauren GILES, Peter HAND, Nevin JOHN, Matthew LEE, Nyan LYNN, Andrew NEAL, Tom OXLEY, Darshan SHAH, Hans Tsuang-Han TU, Vinojini VIVEK, Teddy WU, Bernard YAN, Nawaf YASSI, Henry ZHAO |
|                          | Study Coordinator(s)   | Amy MCDONALD, Gabriel SILVER                                                                                                                                                                                                                    |

**CANADA****Country Lead:** Shelagh COUTTS***Enrolled 100 or more patients***

| Site                           | Role                   | Team Member                                                                                                                                                                                                                                                                                                             |
|--------------------------------|------------------------|-------------------------------------------------------------------------------------------------------------------------------------------------------------------------------------------------------------------------------------------------------------------------------------------------------------------------|
| University of Alberta Hospital | Principal Investigator | Ashfaq SHUAIB                                                                                                                                                                                                                                                                                                           |
|                                | Co-Investigator(s)     | Aftab AHMAD, Ghazala BASIR, Bashir BREBESH, Asif Javed BUTT, Shubhabrata DAS, Atlantic D'SOUZA, Bikram GAJUREL, Esseddeeg GHROODA, Dulara HUSSAIN, Hayrapet KALASHYA, Harsha KAMBLE JAYAPRAKASH, Mahesh KATE, Sahrish Aieshah KAZI, Herbert Alejandro MANOSALVA, Raj PARTHASARATHY, Sibi THIRUNAVUKARASU, Andrew WASSEF |
|                                | Study Coordinator(s)   | Brenda SCHWINDT                                                                                                                                                                                                                                                                                                         |

***Enrolled 50-99 patients***

| Site                                     | Role                   | Team Member                                                                                                                                                                                                                                                                                                                                                                                                                                                                                       |
|------------------------------------------|------------------------|---------------------------------------------------------------------------------------------------------------------------------------------------------------------------------------------------------------------------------------------------------------------------------------------------------------------------------------------------------------------------------------------------------------------------------------------------------------------------------------------------|
| University of Calgary - Foothills Campus | Principal Investigator | Shelagh COUTTS                                                                                                                                                                                                                                                                                                                                                                                                                                                                                    |
|                                          | Co-Investigator(s)     | Abdulaziz AL SULTAN, Amjad ALSERAYA, Sarah BLAYNEY, Debabrata CHAKRABORTY, Shuo CHEN, Philip CHOI, Sadanand DEY, Veronique DUBUC, Prasanna ESWARADASS, James W. EVANS, Thalia FIELD, Brett GRAHAM, Janka HEGEDUS, Michael HILL, Oje IMOUKHUEDE, Evgenia KLOURFELD, Andrew LOCKEY, Aimen MOUSSADDY, Tapuwa MUSUKA, Nancy NEWCOMMON, Davar NIKNESHAN, Ramana REDDY, Dilip SINGH, Ravinder SINGH, Amith SITARAM, Ericka TELEG, Carol THAM, Anurag TRIVEDI, Stephen VAN GAAL, Amy YU, Charlotte ZERNA |
|                                          | Study Coordinator(s)   | Carol KENNEY, Supriya SAVE                                                                                                                                                                                                                                                                                                                                                                                                                                                                        |

| Site                          | Role                      | Team Member                                                                                                |
|-------------------------------|---------------------------|------------------------------------------------------------------------------------------------------------|
| Charles LeMoyné Hospital      | Principal Investigator    | Jean-Martin BOULANGER                                                                                      |
|                               | Co-Investigator(s)        | Leo BERGER                                                                                                 |
|                               | Study Coordinator(s)      | Lise BLAIS                                                                                                 |
| Enfant-Jésus Hospital         | Principal Investigator    | Steve VERREAULT                                                                                            |
|                               | Co-Investigator(s)        | Marie-Christine CAMDEN, Ariane MACKEY                                                                      |
|                               | Study Coordinator(s)      | Karine COLLARD, Annette HACHE                                                                              |
| Grey Nuns Hospital            | Principal Investigator(s) | Brian BUCK, Muzaffar SIDDIQUI                                                                              |
|                               | Co-Investigator(s)        | Rajive JASSAL                                                                                              |
|                               | Study Coordinator(s)      | Dana BERGQUIST, Lori PIQUETTE                                                                              |
| London Health Sciences Center | Principal Investigator    | Richard CHAN                                                                                               |
|                               | Co-Investigator(s)        | Shahram ABOOTALEBI, Rasha ALSUBAIE, Reza AZARPAZHOOH, Sebastian FRIDMAN, Alexander KHAW, Jennifer MANDZIA, |

I  
r  
y  
n  
a  
P  
A  
L  
A  
M  
A  
R  
C  
H  
U  
K  
,  
P  
a  
t  
r  
i  
c  
i  
a  
R  
I  
C  
C  
I  
O  
,  
L  
u  
c  
i  
a  
n  
o  
S  
P  
O  
S  
A  
T  
O

|                            |                                                                          |                                                                                                                                                                                                               |
|----------------------------|--------------------------------------------------------------------------|---------------------------------------------------------------------------------------------------------------------------------------------------------------------------------------------------------------|
|                            | Study Coordinator(s)                                                     | Belinda AMATO-MARZIALI, Beth BEAUCHAMP, Susan CRANN, Kim HESSER, Lindsay LAMBOURN                                                                                                                             |
| Montreal General Hospital  | Principal Investigator<br>Co-Investigator(s)<br>Study Coordinator(s)     | Theodore WEIN<br>Eric EHRENSPERGER, Lucy VIEIRA<br>Lisa WADUP                                                                                                                                                 |
| Notre-Dame Hospital        | Principal Investigator<br>Co-Investigator(s)                             | Celine ODIER<br>Nicole DANEAULT, Yan DESCHAINTE, Andre DUROCHER, Laura GIOIA, Gregory JACQUIN, Sylvain LANTHIER, Alexandre POPPE, Christian STAPF                                                             |
|                            | Study Coordinator(s)                                                     | Marlene LAPIERRE                                                                                                                                                                                              |
| Vancouver General Hospital | Principal Investigator<br>Co-Investigator(s)<br><br>Study Coordinator(s) | Samuel YIP<br>Negar ASDAGHI, Oscar BENAVENTE, Thalia FIELD, Alejandra GOMEZ GONZALEZ, Asaf HONIG, Sharan MANN, Colleen MURPHY, Philip TEAL, Stephen VAN GAAL, Laura WILSON<br>Genoveva MACLEAN, Karina MURRAY |

## FINLAND

**Country Lead:** Risto ROINE

| Site                                 | Role                                                                     | Team Member                                                                                                                                                                                                                                                                                                    |
|--------------------------------------|--------------------------------------------------------------------------|----------------------------------------------------------------------------------------------------------------------------------------------------------------------------------------------------------------------------------------------------------------------------------------------------------------|
| Helsinki University Central Hospital | Principal Investigator<br>Co-Investigator(s)                             | Turgut TATLISUMAK<br>Sami CURTZE, Reetta KIVIOJA, Maija KOIVU, Tea LARJO, Ivan MARINKOVIC, Nicolas MARTINEZ-MAJANDER, Emilia OSTERLUND-TAURIALA, Anastasia SHULGA, Gerli SIBOLT, Anna TAPANAINEN, Marjaana TIAINEN, Liisa TOMPPO, Outi TUMPULA, Sannakaisa VAINIKKA, Kati VALKONEN, Jyri VIRTÄ, Emil YLIKALLIO |
|                                      | Study Coordinator(s)                                                     | Saija EIROLA                                                                                                                                                                                                                                                                                                   |
| Turku University Hospital            | Principal Investigator<br>Co-Investigator(s)<br><br>Study Coordinator(s) | Risto ROINE<br>Julia AIVO, Anna BRUCK, Lauri HURRI, Manu JOKELA, Jaana KORPELA, Susanna ROINE, Jori RUUSKANEN, Pauli YLIKOTILA<br>Jaana ERIKSSON                                                                                                                                                               |

## FRANCE

**Country Lead:** Pierre AMARENCO

| Site                             | Role                                                                     | Team Member                                                                                                                                                                |
|----------------------------------|--------------------------------------------------------------------------|----------------------------------------------------------------------------------------------------------------------------------------------------------------------------|
| Adolphe de Rothschild Foundation | Principal Investigator<br>Co-Investigator(s)<br>Study Coordinator(s)     | Michael OBADIA<br>Mathieu FISSELLIER, Laura GROSLIERE<br>Soukie JOUAVILLE, Elise PERRIOT, Alessandra PINCINI,<br>Josephine TINE                                            |
| Bichat-Claude Bernard Hospital   | Principal Investigator<br>Co-Investigator(s)<br><br>Study Coordinator(s) | Elena MESEGUER<br>Pierre AMARENCO, Lucie CABREJO, Céline GUIDOUX, Cristina HOBEANU, Philippa LAVALLEE, Anna MARTIN BECHET, Ricardo RIGUAL<br>Estelle BEGON, Loubna DJEDIDI |
| Fleyriat Hospital                | Principal Investigator                                                   | Frederic PHILIPPEAU                                                                                                                                                        |

|                            |                        |                                                                                                                                   |
|----------------------------|------------------------|-----------------------------------------------------------------------------------------------------------------------------------|
|                            | Co-Investigator(s)     | Angel-Christian OLARU, Taras SOSYAK                                                                                               |
| Foch Hospital              | Principal Investigator | Bertrand LAPERGUE                                                                                                                 |
|                            | Co-Investigator(s)     | Adrien WANG                                                                                                                       |
|                            | Study Coordinator(s)   | Delphine LOPEZ                                                                                                                    |
| Pierre Wertheimer Hospital | Principal Investigator | Norbert NIGHOGHOSSIAN                                                                                                             |
|                            | Co-Investigator(s)     | Amandine BENOIT, Tae-Hee CHO, Laurent DEREK, Laura MECHTOUFF, Elodie ONG                                                          |
|                            | Study Coordinator(s)   | Marielle BUISSON                                                                                                                  |
| Pitie-Salpetriere Hospital | Principal Investigator | Yves SAMSON                                                                                                                       |
|                            | Co-Investigator(s)     | Flore BARONNET, Sophie CROZIER, Sandrine DELTOUR, Belen DIAZ FERNANDEZ, Raphael LE BOUC, Anne LEGER, Charlotte ROSSO, Marion YGER |
|                            | Study Coordinator(s)   | Bachir AIDAQUI, Christine PIRES                                                                                                   |

## GERMANY

**Country Lead:** Hans-Christoph DIENER

| Site                              | Role                    | Team Member                                                                                                                                                         |
|-----------------------------------|-------------------------|---------------------------------------------------------------------------------------------------------------------------------------------------------------------|
| Central Bremen Hospital           | Principal Investigator  | Andreas KASTRUP                                                                                                                                                     |
|                                   | Co-Investigator(s)      | Uwe BECKER, Freimuth BRUNNER, Janina GUENTNER, Andreas SCHROTER                                                                                                     |
|                                   | Study Coordinator(s)    | Halil MERDIVAN                                                                                                                                                      |
| Hannover Medical School           | Principal Investigator  | Karin WEISSENBORN                                                                                                                                                   |
|                                   | Co-Investigator(s)      | Maria GABRIEL, Gerrit GROSSE, Ramona SCHUPPNER, Hans WORTHMANN                                                                                                      |
|                                   | Study Coordinator(s)    | Femke PLÜSCHKE, Karen SCHAEFFER, Frederike VON DER HAAR                                                                                                             |
| University Hospital Essen         | Principal Investigators | Hans-Christoph DIENER, Martin KOEHRMANN, Christian WEIMAR                                                                                                           |
|                                   | Co-Investigator(s)      | Hsin-Chieh CHEN, Benedikt FRANK, Karim HAJJAR                                                                                                                       |
|                                   | Study Coordinator(s)    | Melanie DIETZOLD                                                                                                                                                    |
| University Hospital Frankfurt     | Principal Investigator  | Waltraud PFEILSCHIFTER                                                                                                                                              |
|                                   | Co-Investigator(s)      | Ferdinand BOHMANN, Iris DIVE, Katharina FILIPSKI, Christian FOERCH, Roxane-Isabelle KESTNER, Matthias LORENZ, Jan Hendrik SCHAEFER, Alexander SEILER, Damla TAHTALI |
|                                   | Study Coordinator(s)    | Heike RAI                                                                                                                                                           |
| University Hospital of Ulm        | Principal Investigator  | Katharina ALTHAUS                                                                                                                                                   |
|                                   | Co-Investigator(s)      | Susanne MUELLER, Hermann NEUGEBAUER, Sebastian STOESSER, Sebastien STROH                                                                                            |
|                                   | Study Coordinator(s)    | Sabine RAUBOLD                                                                                                                                                      |
| University Medical Center Hamburg | Principal Investigator  | Gotz THOMALLA                                                                                                                                                       |
|                                   | Co-Investigator(s)      | Christoph BECK, Bastian CHENG, Amir GOLSARI, Julia HOPPE, Anna C KRUTZELMANN, Julian SCHROEDER, Dieke VOGET                                                         |
|                                   | Study Coordinator(s)    | Dagmar OTTO                                                                                                                                                         |



**MEXICO****Country Lead:** Jorge VILLARREAL-CAREAGA

| Site                                  | Role                   | Team Member                                              |
|---------------------------------------|------------------------|----------------------------------------------------------|
| Neurosciences<br>Clinical Trials S.C. | Principal Investigator | Elmer Guillermo LOPEZ MEZA                               |
|                                       | Co-Investigator(s)     | Karla Gabriela ALTAMIRANO BELTRAN, Claudia PEREZ CORONEL |
|                                       | Study Coordinator(s)   | Wendy LOPEZ MEZA                                         |

**NEW ZEALAND****Country Lead:** Peter Alan BARBER

| Site                      | Role                   | Team Member                                                                    |
|---------------------------|------------------------|--------------------------------------------------------------------------------|
| Auckland City<br>Hospital | Principal Investigator | Peter Alan BARBER                                                              |
|                           | Co-Investigator(s)     | Neil ANDERSON, Mary BRENNAN, Nicole JENKINS, Justin KAO, Dominic TSE, Teddy WU |
|                           | Study Coordinator(s)   | Lily ZHAO                                                                      |

**SPAIN****Country Lead:** Carlos MOLINA**Enrolled 50-99  
patients**

| Site                                | Role                   | Team Member                                                                                                                                                                                     |
|-------------------------------------|------------------------|-------------------------------------------------------------------------------------------------------------------------------------------------------------------------------------------------|
| Santa Creu and<br>Sant Pau Hospital | Principal Investigator | Joan MARTÍ-FÀBREGAS                                                                                                                                                                             |
|                                     | Co-Investigator(s)     | Ignacio ARACIL- BOLAÑOS, Pol CAMPS-RENOM, Raquel DELGADO-MEDEROS, Sebastian FIGUEROA, Daniel GUISSADO-ALONSO, Alejandro MARTÍNEZ-DOMEÑO, Luis PRATS-SÁNCHEZ, Manuel SIMÓN-TALERO, Javier SOTOCA |
|                                     | Study Coordinator(s)   | Rebeca MARÍN                                                                                                                                                                                    |

| Site                          | Role                                          | Team Member                                                                                                                                                                                                       |
|-------------------------------|-----------------------------------------------|-------------------------------------------------------------------------------------------------------------------------------------------------------------------------------------------------------------------|
| Basurto Hospital              | Principal Investigator                        | Maria del Mar FREIJO GUERRERO                                                                                                                                                                                     |
|                               | Co-Investigator(s)                            | Borja AGUILERA, Laura AUZMENDI, Jose Maria FERNANDEZ, Maria del Carmen GIL ALZUETA, Sonia GONZALEZ, Juan Luis IDRO, Ana IKERNE, Ana Maria LORENZO GARCIA, Arancha SAINZ, Saul SILVARREY RODRIGUEZ                 |
|                               | Study Coordinator(s)                          | Juan Manuel GARCIA SANCHEZ                                                                                                                                                                                        |
| Burgos University<br>Hospital | Principal Investigator                        | Yolanda BRAVO ANGUIANO                                                                                                                                                                                            |
|                               | Co-Investigator(s)                            | Monica BARTULOS IGLESIAS, Daniel PASCUAL CARRASCAL, Francisco Javier RODRIGUES PEGUERO, Jose Maria TREJO GABRIEL Y GALAN                                                                                          |
| Girona University<br>Hospital | Principal Investigators<br>Co-Investigator(s) | Maria del Mar CASTELLANOS RODRIGO, Joaquin SERENA Berta ALEMANY PERNA, Saima BASHIR, Irene BRAGADO, Cristina COLL, Ana COTS, Mar IRIDA LLORET VILLAS, Fabian MARQUEZ, Yolanda SILVA, Mikel TERCENO, Karol Enrique |

|                           |                        |                                                                                                                                                     |
|---------------------------|------------------------|-----------------------------------------------------------------------------------------------------------------------------------------------------|
|                           | Study Coordinator(s)   | USCAMAITA, Cecile VAN EENDENBURG<br>Berta JORDAN, Martha KAZIMIERCZAK, Laura PARDO                                                                  |
| Hospital del Mar          | Principal Investigator | Jaume ROQUER                                                                                                                                        |
|                           | Co-Investigator(s)     | Elisa CUADRADO, Eva GIRALT, Jordi JIMENEZ CONDE, Angel OIS, Ana RODRIGUEZ, Rosa VIVANCO                                                             |
|                           | Study Coordinator(s)   | Gemma ROMERAL                                                                                                                                       |
| Hospital Donostia         | Principal Investigator | Ana Maria DE ARCE BORDA                                                                                                                             |
|                           | Co-Investigator(s)     | Noemi DIEZ GONZALEZ, Felix GONZALEZ LOPEZ, Maria Begona MARTINEZ PINEIRO, Maria Teresa MARTINEZ ZABALETA, Mikel TAINTA CUEZVA, Miren ZULAICA IJURCO |
| La Fe University Hospital | Principal Investigator | Aida LAGO                                                                                                                                           |
|                           | Co-Investigator(s)     | Gerardo FORTEA, Rogelio LOPEZ, Lluís MORALES-CABA, Jose Ignacio TEMBL                                                                               |
|                           | Study Coordinator(s)   | Patricia SAHUQUILLO                                                                                                                                 |
| Miguel Servet Hospital    | Principal Investigator | Javier MARTA-MORENO                                                                                                                                 |
|                           | Co-Investigator(s)     | Jorge ARTAL, Rocio CALDU, Ariadna FERNÁNDEZ, Maria SERAL-MORAL, Marta SERRANO                                                                       |
|                           | Study Coordinator(s)   | Herbert TEJADA MEZA                                                                                                                                 |
| Vall d'Hebron Hospital    | Principal Investigator | Carlos MOLINA                                                                                                                                       |
|                           | Co-Investigator(s)     | Sandra BONED, Jesus JUEGA, Marian MUCHADA, Noelia RODRIGUEZ                                                                                         |
|                           | Study Coordinator(s)   | Estela SANJUAN                                                                                                                                      |

## UNITED KINGDOM

**Country Lead:** James KENNEDY

| Site                                  | Role                   | Team Member                                                                                                                                               |
|---------------------------------------|------------------------|-----------------------------------------------------------------------------------------------------------------------------------------------------------|
| Addenbrooke's Hospital                | Principal Investigator | Kayvan KHADJOOI                                                                                                                                           |
|                                       | Co-Investigator(s)     | Denish CHANDRASENA<br>Sarah CRISP, Nick EVANS, Barnaby FIDDES, Niamh HANNON, Derek HAYDEN, Helen HAYHOE, Siobhan KELLY, Eoin O'BRIEN, Elizabeth WARBURTON |
|                                       | Study Coordinator(s)   | Elaine AMIS, Charlotte FARRON, Jennifer MITCHELL                                                                                                          |
| John Radcliffe Hospital               | Principal Investigator | James KENNEDY                                                                                                                                             |
|                                       | Co-Investigator(s)     | Gary FORD, Philip MATHIESON, Sara MAZZUCCO, George POPE, Ian RECKLESS, Ursula SCHULZ, Ku SHAH                                                             |
|                                       | Study Coordinator(s)   | Rachel TEAL                                                                                                                                               |
| Luton & Dunstable University Hospital | Principal Investigator | Lakshmanan SEKARAN                                                                                                                                        |
|                                       | Co-Investigator(s)     | Lankanatha ALWIS, Niaz MOHAMMAD, Johnson PHILIPPANATHAN, Duke PHIRI, Sakthivel SETHURAMAN                                                                 |
|                                       | Study Coordinator(s)   | Margaret TATE                                                                                                                                             |
| Northwick Park Hospital               | Principal Investigator | David COHEN                                                                                                                                               |
|                                       | Co-Investigator(s)     | Mudhar ABDUL-SAHAB, Lankanatha ALWIS, Raj BATHULA, Joe DEVINE, Silvie DOUBRAVSKA, Radim LICENIK, Mmua NGWAKO, Nabeela NISAR, Aravinth SIVAGNANARATNAM     |
|                                       | Study Coordinator(s)   | Mushiya MPELEMBUE                                                                                                                                         |

|                                     |                        |                                                                                                                                |
|-------------------------------------|------------------------|--------------------------------------------------------------------------------------------------------------------------------|
| Queen Elizabeth University Hospital | Principal Investigator | Keith MUIR                                                                                                                     |
|                                     | Co-Investigator(s)     | Barath CHERIPELLI, Jennifer ELLIOT, Xuya HUANG, Dheeraj KALLADKA, Fiona MORETON, Sankaranarayanan RAMACHANDRAN, Salwa EL TAWIL |
|                                     | Study Coordinator(s)   | Wilma SMITH                                                                                                                    |
| Royal Stoke University Hospital     | Principal Investigator | Indira NATARAJAN                                                                                                               |
|                                     | Co-Investigator(s)     | Jayan CHEMBALA, Christine ROFFE, Ranjan SANYAL, Anushka WARUSEVITANE, Janaka WEERATHUNGA                                       |
|                                     | Study Coordinator(s)   | Racquel CARPIO                                                                                                                 |
| Royal United Hospital               | Principal Investigator | Lukuman GBADAMOSHI                                                                                                             |
|                                     | Co-Investigator(s)     | James CHOULERTON, Lindsey DOW, Helen NEWTON, Louise SHAW, Andrew STONE                                                         |
|                                     | Study Coordinator(s)   | Joanne AVIS, Suzanne LUCAS, Barbara MADIGAN                                                                                    |
| Southampton General Hospital        | Principal Investigator | Nic WEIR                                                                                                                       |
|                                     | Co-Investigator(s)     | Pam CRAWFORD, Sue EVANS, James MARIGOLD, Emma WOOD                                                                             |
|                                     | Study Coordinator(s)   | Imogen GARTRELL, Simon SMITH                                                                                                   |
| University College Hospital         | Principal Investigator | Richard PERRY                                                                                                                  |
|                                     | Co-Investigator(s)     | Gargi BANERGEE, Duncan WILSON                                                                                                  |
|                                     | Study Coordinator(s)   | Azra BANARAS, Caroline WATCHURST                                                                                               |

## UNITED STATES

### ***Enrolled 100 or more patients***

| Site                                    | Role                   | Team Member                                       |
|-----------------------------------------|------------------------|---------------------------------------------------|
| <b>Guilford Neurological Associates</b> | Principal Investigator | Pramod SETHI                                      |
|                                         | Co-Investigator(s)     | Jindong XU, Yijun YAN                             |
|                                         | Study Coordinator(s)   | Rizwan SABIR                                      |
| <b>Benefis Hospitals Inc</b>            | Principal Investigator | Dennis DIETRICH                                   |
|                                         | Co-Investigator(s)     | William HENNING                                   |
|                                         | Study Coordinator(s)   | Laura ARMSTRONG, MegAnne CASEY, Veronica SCHAEFER |

### ***Enrolled 50-99 patients***

| Site                                  | Role                   | Team Member                                    |
|---------------------------------------|------------------------|------------------------------------------------|
| <b>Buffalo General Medical Center</b> | Principal Investigator | Marilou CHING                                  |
|                                       | Co-Investigator(s)     | Christopher DELINE, Amit KANDEL, Robert SAWYER |
|                                       | Study Coordinator(s)   | Annemarie CRUMLISH, Dawn L. HOLLER             |
| <b>Houston</b>                        | Principal Investigator | David CHIU                                     |

| <b>Methodist Hospital</b>                       | Co-Investigator(s)                            | Donald BLEDSOE, Rajan GADHIA, Delmar IMPERIAL-AUBIN, Jason A. LEE, David MCCANE, Vivek MISRA, Eva MISTRY, Stacy MOYE, Haseeb RAHMAN, Abraham THOMAS, John VOLPI, Shannon WHITE                                                                                                                                                                                                                                          |
|-------------------------------------------------|-----------------------------------------------|-------------------------------------------------------------------------------------------------------------------------------------------------------------------------------------------------------------------------------------------------------------------------------------------------------------------------------------------------------------------------------------------------------------------------|
| <b>Northwestern Memorial Hospital</b>           | Principal Investigators<br>Co-Investigator(s) | Mark ALBERTS, Richard BERNSTEIN<br>Fan CAPRIO, Philip CHANG, Chen LIN, Scott MENDELSON, Shyam PRABHAKARAN, Ilana RUFF TREIBER                                                                                                                                                                                                                                                                                           |
|                                                 | Study Coordinator(s)                          | Kathryn MUSKOVICH, Erin WYMORE                                                                                                                                                                                                                                                                                                                                                                                          |
| <b>Cleveland Clinic</b>                         | Principal Investigator<br>Co-Investigator(s)  | Irene KATZAN<br>Mahmoud AL-MASRY, Andrew BULETKO, Luzma CARDONA, Russell CEREJO, Esteban CHENG-CHING, Abeer FARRAG, Pravin GEORGE, Shazam HUSSAIN, Ahmed ITRAT, Seby JOHN, Zashaun KHAWAJA, Mei LU, ShuMei MAN, Jason MATHEW, Johanna MORTON, Naresh MULLAGURI, Andrew RUSSMAN, Lakshmi SHANKAR, Lila SHEIKHI, Ather TAQUI, Tapan THACKER, Gabor TOTH, Ken UCHINO, Paul WASIELEWSKI, Dolora WISCO                       |
|                                                 | Study Coordinator(s)                          | Erin BYNUM, Vikram PUVENNA, Amy RICHMOND, Nancie TIGHE                                                                                                                                                                                                                                                                                                                                                                  |
| <b>UCSD Medical Center - Hillcrest Hospital</b> | Principal Investigator<br>Co-Investigator(s)  | Dawn MEYER<br>Kunal AGRAWAL, Maysun ALI, Kevin ATTENHOFER, Nhu BRUCE, Jessica CHOE, Robert CLAYCOMB, Amy GUZIK, Lovella HAILEY, Thomas HEMMEN, Nabeel HERIAL, James HO, Branko HUISA, Kiet LOC, Abhishek LUNAGARIYA, Brett MEYER, Royya MODIR, Melissa MORTIN, Rajiv NARULA, William NEIL, David NGUYEN, Bruce OVBIAGELE, Mohsen PIRASTEHFAR, Hami RAMANI, Belma SADIKOVIC, Konrad SCHLICK, Pradeep SELVAN, Ajeet SODHI |
|                                                 | Study Coordinator(s)                          | Nancy KELLY, Brittney LEHMANN, Karen RAPP, Kathleen RICKES, Kristin WOODS                                                                                                                                                                                                                                                                                                                                               |
| <b>Site</b>                                     | <b>Role</b>                                   | <b>Team Member</b>                                                                                                                                                                                                                                                                                                                                                                                                      |
| Alexian Brothers Medical Center                 | Principal Investigator<br>Co-Investigator(s)  | Franklin MARDEN<br>Michele BEY, Phil GORELICK, Colleen HARRISON, Alkesh PATEL, Anna RAIMONDI, Ginger REILLY, Merrel REISS, Sanford SHERMAN, Theresa TERNA                                                                                                                                                                                                                                                               |
|                                                 | Study Coordinator(s)                          | Michele BEY, Elizabeth FOX (KIM)                                                                                                                                                                                                                                                                                                                                                                                        |
| Allegheny General Hospital                      | Principal Investigators<br>Co-Investigator(s) | Hebah HEFZY, Ashis TAYAL<br>Beth BREMNER, Edward GETTINGS, Omar HAMMAD, Judy JAROUSE, Michael MARYNOWSKI, John O'NEILL, Ramnath RAMANATHAN, Laxmi SHAH, Arvind VENKAT, Crystal WONG, David WRIGHT                                                                                                                                                                                                                       |
|                                                 | Study Coordinator(s)                          | Vibha CHAUHAN, Gail LOVE, Melissa TIAN                                                                                                                                                                                                                                                                                                                                                                                  |
| Augusta Health                                  | Principal Investigator<br>Co-Investigator(s)  | Robert MCMAHON<br>Roger GILDERSLEEVE                                                                                                                                                                                                                                                                                                                                                                                    |
|                                                 | Study Coordinator(s)                          | Rebecca CUTLIP                                                                                                                                                                                                                                                                                                                                                                                                          |

|                                        |                         |                                                                                                                                                                                                             |
|----------------------------------------|-------------------------|-------------------------------------------------------------------------------------------------------------------------------------------------------------------------------------------------------------|
| Augusta University Medical Center      | Principal Investigator  | Jeffrey SWITZER                                                                                                                                                                                             |
|                                        | Co-Investigator(s)      | Feroze AFZAL, Tia ARYAL, Askiel BRUNO, Hartmut GROSS, David HESS, Fenwick NICHOLS, Mihaela SALER, Shannon STEWART, Nabil WEES                                                                               |
|                                        | Study Coordinator(s)    | Natalie BISHOP, Erin CHRISTENSEN, Brian CLOSE, Sneha JACOB, Julie JORDAN, Tawanna MASSENBERG, Kori WILLIAMS                                                                                                 |
| Bon Secours St. Francis Medical Center | Principal Investigators | Chi-Kin NG, Amandeep SANGHA                                                                                                                                                                                 |
|                                        | Co-Investigator(s)      | Daniel ANGELI, Mudassar ASGHAR, Stacey EPPS                                                                                                                                                                 |
|                                        | Study Coordinator(s)    | April CAMPBELL, Bonnie GRUBBS, Lavon HARRIS, Patricia LANE                                                                                                                                                  |
| Bon Secours St. Mary's Hospital        | Principal Investigators | Chi-Kin NG, Amandeep SANGHA, Alan SCHULMAN                                                                                                                                                                  |
|                                        | Co-Investigator(s)      | Matthew BOYCE, Robert COHEN, Rachel DONALDSON, Supakunya EDMONSON, Daniel HARDY, Kim HARRIS, Francis MCGEE, John O'BANNON, Mary RANSOM, Noma REHMAN, Thomas SMITH, Brian STUCKI, Robert WHITE, John WITTMAN |
|                                        | Study Coordinator(s)    | April CAMPBELL, Bonnie GRUBBS, Ileana KINNIE, Tamika WALTHOUR                                                                                                                                               |
| Boston Medical Center                  | Principal Investigators | Carlos S. KASE, Jose Rafael ROMERO                                                                                                                                                                          |
|                                        | Co-Investigator(s)      | Hugo APARICIO, Viken BABIKIAN, David GREER, Thanh NGUYEN                                                                                                                                                    |
|                                        | Study Coordinator(s)    | Saleh ABBAS, Helena LAU, Matthew OGRODNIK                                                                                                                                                                   |
| Carolinas Medical Center               | Principal Investigators | Phaniraj IYENGAR, Sanjay IYER                                                                                                                                                                               |
|                                        | Co-Investigator(s)      | Andrew ASIMOS, Aristides CHACONAS, Joseph GIORDANO, Anita HOYT, Swatiben PATEL, Darla STEVENS, Mary TRAYNOR                                                                                                 |
|                                        | Study Coordinator(s)    | Nicol BRANDON, Anja DAILEY, Megan KRAMER, Marlow PRICE, Blondene ROBINSON                                                                                                                                   |
| Cedars-Sinai Medical Center            | Principal Investigator  | Shlee SONG                                                                                                                                                                                                  |
|                                        | Co-Investigator(s)      | Oana DUMITRASCU, Duy LE, Patrick LYDEN, Fernando MAYORBASTO, Mani NEZHAD, Konrad SCHLICK, Mohammad SHAFIE, Yilin SHEK                                                                                       |
|                                        | Study Coordinator(s)    | Peter Chang KIM                                                                                                                                                                                             |
| Cleveland Regional                     | Principal Investigator  | Gaurang PALIKH                                                                                                                                                                                              |
|                                        | Study Coordinator(s)    | Rayna EDWARDS, Amelia REYNOLDS                                                                                                                                                                              |
| Dartmouth-Hitchcock Medical Center     | Principal Investigator  | Timothy LUKOVITS                                                                                                                                                                                            |
|                                        | Co-Investigator(s)      | Robin CLARK-ARBOGAST, Richard GODDEAU, Jason JOHNS, Vijay RENGHA, Diana ROJAS-SOTO                                                                                                                          |
|                                        | Study Coordinator(s)    | Charlotte JEFFREYS, Margaret NOTESTINE                                                                                                                                                                      |
| Desert Regional Medical Center         | Principal Investigators | Luis ARANGUA, Ajeet SODHI, M. Asif TAQI                                                                                                                                                                     |
|                                        | Co-Investigator(s)      | Robert CLAYCOMB, Glenn Mark FISCHBERG, XIAO-TANG KONG, Andrew NIK, Tami SALAHUDDIN, Nicholas TARLOV                                                                                                         |
|                                        | Study Coordinator(s)    | Yasir KHAN                                                                                                                                                                                                  |
| Eisenhower Medical Center              | Principal Investigator  | Bishoy LABIB                                                                                                                                                                                                |
|                                        | Co-Investigator(s)      | NAMIN-REZA SALARI                                                                                                                                                                                           |
|                                        | Study Coordinator(s)    | Moheib FAHEIM, Kamel KAMEL, Dianna LABIB                                                                                                                                                                    |
| Ellis Hospital                         | Principal Investigator  | Kejian TANG                                                                                                                                                                                                 |
|                                        | Co-Investigator(s)      | Abdelhakim DINAR, Francisco GOMEZ                                                                                                                                                                           |
|                                        | Study Coordinator(s)    | Margie PANETTA                                                                                                                                                                                              |

|                                           |                                                                           |                                                                                                                                                                                                                |
|-------------------------------------------|---------------------------------------------------------------------------|----------------------------------------------------------------------------------------------------------------------------------------------------------------------------------------------------------------|
| Evanston Hospital                         | Principal Investigators<br>Co-Investigator(s)<br>Study Coordinator(s)     | Rima DAFER, Archie ONG<br>Fulvio GIL, Deb LYNCH, Steven MEYERS, Richard MUNSON<br>Julie ANDERSON, Sherri LOEB, Mary-Lou MAHER, Stasia Diana ROUSE                                                              |
| Fletcher Allen Hospital of Vermont        | Principal Investigator<br>Co-Investigator(s)<br>Study Coordinator(s)      | Mark GORMAN<br>Christopher COMMICHAU<br>Cathy GREGORY, Sharon KENNEY                                                                                                                                           |
| Forsyth Medical Center                    | Principal Investigator<br>Co-Investigator(s)<br><br>Study Coordinator(s)  | Chere CHASE<br>Benjamin ANYANWU, Tamas BATHORY, Paul BURKE, Ashley CAMPBELL, Brittney CAMPBELL, Tarek DAKAKNI, Veronica HEATH, Howard KRAFT, Eric MELVIN, Olukayode ONASANYA, Charles STEWART<br>Debra NORWOOD |
| Great Falls Clinic Hospital               | Principal Investigator<br>Study Coordinator(s)                            | Dennis DIETRICH<br>Laura ARMSTRONG                                                                                                                                                                             |
| Harborview Medical Center                 | Principal Investigator<br>Co-Investigator(s)<br><br>Study Coordinator(s)  | David TIRSCHWELL<br>Kyra BECKER, Claire CREUTZFELDT, Rizwan KALANI, Marlan KAY, Sandeep KHOT, Will LONGSTRETH, Sara SCHEPP, Jon WEINSTEIN<br>Allison KUNZE, Glenn SCHUBERT, Patricia TANZI                     |
| Hartford Hospital                         | Principal Investigator<br>Co-Investigator(s)<br>Study Coordinator(s)      | Louise MCCULLOUGH<br>Catherine HOSLEY, Lauren SANSING, Isaac SILVERMAN<br>Martha AHLQUIST                                                                                                                      |
| Henrico Doctors' Hospital - Forest Campus | Principal Investigator<br>Co-Investigator(s)<br><br>Study Coordinator(s)  | Alan SCHULMAN<br>Matthew BOYCE, Daniel HARDY, George HARRIS, John O'BANNON, Stephen THURSTON, John WITTMAN<br>Melanie JOHNSON, Ileana KINNIE, Tamika WALTHOUR                                                  |
| Hollywood Presbyterian Medical Center     | Principal Investigator<br>Co-Investigator(s)<br>Study Coordinator(s)      | Tamika BURRUS<br>Philip ABDOUSH, Christian GALICIA<br>Laurie BERNDT, Nancy RAPPARD                                                                                                                             |
| Ingalls Memorial Hospital                 | Principal Investigator<br>Co-Investigator(s)<br>Study Coordinator(s)      | Engin YILMAZ<br>Tonya FULLER<br>Deborah LAWRENCE                                                                                                                                                               |
| Jersey Shore University Medical Center    | Principal Investigator<br>Co-Investigator(s)<br><br>Study Coordinator(s)  | Stephen MARTINO<br>Alan DEUTSCH, John FITZPATRICK, Paul GILSON, Paul KOSTOULAKOS, Mary SEDAROUS, Edward SPELLMAN<br>Fiona COLLINS, AnneMarie DETORO, Jennifer ORTIZ                                            |
| JFK Medical Center                        | Principal Investigators<br>Co-Investigator(s)<br><br>Study Coordinator(s) | Jawad KIRMANI, Spozhmy PANEZAI<br>Jaskiran BRAR, Daniel KORYA, Ashish KULHARI, Siddhart MEHTA, Mohammad MOUSSAVI, Aashish PATEL, Amrinder SINGH, Sara STRAUSS<br>Briana DECARVALHO                             |
| John Muir Medical Center - Concord Campus | Principal Investigator<br>Co-Investigator(s)<br>Study Coordinator(s)      | Ray STEPHENS<br>Leslie GILLUM, Steven SCHADENDORF<br>Janice STEPHENS                                                                                                                                           |
| John Muir Medical                         | Principal Investigator                                                    | Ray STEPHENS                                                                                                                                                                                                   |

|                                                   |                         |                                                                                                                                                                                                                  |
|---------------------------------------------------|-------------------------|------------------------------------------------------------------------------------------------------------------------------------------------------------------------------------------------------------------|
| Center - Walnut Creek Campus                      | Co-Investigator(s)      | Robert ALGAR, Leslie GILLUM, Steven HOLTZ, Janet LIN, Steven SCHADENDORF, Brad VOLPI                                                                                                                             |
|                                                   | Study Coordinator(s)    | Janice STEPHENS                                                                                                                                                                                                  |
| Kaiser Permanente Los Angeles Medical Center      | Principal Investigator  | Zahra AJANI                                                                                                                                                                                                      |
|                                                   | Co-Investigator(s)      | Sierra FORD, Prasanth MANTHENA, Navdeep SANGHA, Theresa SEVILIS, Emanuela SOFRONI                                                                                                                                |
|                                                   | Study Coordinator(s)    | Nancy FLORES, Raymond KIM, Catherine LUI, Vena SOBHAWONGSE, Grace TU, Kim TURNER, Cristina VALDOVINOS                                                                                                            |
| Lehigh Valley Hospital                            | Principal Investigators | John CASTALDO, Frank-Chen ZHANG                                                                                                                                                                                  |
|                                                   | Co-Investigator(s)      | Gary CLAUSER, Adam EDWARDS, Mohammed EL-HUNJUL, Yevgeniy ISAYEV, Megan LEARY, Yuebing LI, Dev MEHTA, Christopher MELINOSKY, Kenneth REICHENBACH, Hermann SCHUMACHER, Lorraine SPIKOL, Jay VARRATO, Hussam YACOUB |
|                                                   | Study Coordinator(s)    | Carol FOX, Leighanne HARTMAN, Terry KLOIBER, Susan NABHAN                                                                                                                                                        |
| Los Robles Hospital Medical Center, Thousand Oaks | Principal Investigator  | M. Asif TAQI                                                                                                                                                                                                     |
|                                                   | Co-Investigator(s)      | Sajid SURIYA                                                                                                                                                                                                     |
| Oaks                                              |                         |                                                                                                                                                                                                                  |
| Loyola University Medical Center                  | Principal Investigator  | Michael SCHNECK                                                                                                                                                                                                  |
|                                                   | Co-Investigator(s)      | Jose BILLER, Lisa MILLSAP, Sarkis MORALES-VIDAL                                                                                                                                                                  |
|                                                   | Study Coordinator(s)    | Tara BERNIER, Linda CHADWICK, Katelynn PRODOEHL                                                                                                                                                                  |
| Maimonides Medical Center                         | Principal Investigator  | Steven RUDOLPH                                                                                                                                                                                                   |
|                                                   | Co-Investigator(s)      | Susan LAW, Alina RABINOVICH                                                                                                                                                                                      |
|                                                   | Study Coordinator(s)    | Holly MORHAIM                                                                                                                                                                                                    |
| Manatee Memorial Hospital                         | Principal Investigator  | W. Alvin MCELVEEN                                                                                                                                                                                                |
|                                                   | Co-Investigator(s)      | Jane BESEN, Ralph GONZALEZ                                                                                                                                                                                       |
|                                                   | Study Coordinator(s)    | Laurie EMMERT, Ericka MARINO, Vickie ROMAN                                                                                                                                                                       |
| Mayo Clinic                                       | Principal Investigator  | Maria AGUILAR                                                                                                                                                                                                    |
|                                                   | Co-Investigator(s)      | Dan CAPAMPANGAN, Bart DEMAERSCHALK, David DODICK, Timothy INGALL, Terri KIERNAN, Joyce LEE-IANNOTTI, Bert VARGAS, Holly YANCY                                                                                    |
|                                                   | Study Coordinator(s)    | Erica BOYD                                                                                                                                                                                                       |
| Mercy Health Saint Mary's                         | Principal Investigator  | Muhammad FAROOQ                                                                                                                                                                                                  |
|                                                   | Co-Investigator(s)      | Christopher GOSHGARIAN, Amy GROENHOUT, Bradley HAVEMAN-GOULD, Jiangyong MIN                                                                                                                                      |
|                                                   | Study Coordinator(s)    | Stacy L. SMITH                                                                                                                                                                                                   |
| Mercy Hospital (Springfield, MO)                  | Principal Investigator  | Robert S. DUFF                                                                                                                                                                                                   |
|                                                   | Co-Investigator(s)      | Emily CROUSE, Robert MEDLEY, Darwin RAMIREZ-ABREU                                                                                                                                                                |
|                                                   | Study Coordinator(s)    | Linda THOMPSON                                                                                                                                                                                                   |
| Mercy Hospital (St. Louis, MO)                    | Principal Investigators | Judd JENSEN, William LOGAN                                                                                                                                                                                       |
|                                                   | Co-Investigator(s)      | Marnie DONOHOO, Barbara GREEN, David REMPE, Mary WILCOX                                                                                                                                                          |
| Mercy Hospital and Medical                        |                         |                                                                                                                                                                                                                  |

P  
r  
i  
n  
c  
i  
p  
a  
l

ator(s)

Susan VAUGHAN

I  
n  
v  
e  
s  
t  
i  
g  
a  
t  
o  
r

J  
e  
f  
f  
r  
e  
y

K  
R  
A  
M  
E  
R

C  
o  
-  
I  
n  
v  
e  
s  
t  
i  
g



|                                  |                         |                                                                                                                                                                                                                                                                                                                                                                                                            |
|----------------------------------|-------------------------|------------------------------------------------------------------------------------------------------------------------------------------------------------------------------------------------------------------------------------------------------------------------------------------------------------------------------------------------------------------------------------------------------------|
| Center                           | Study Coordinator(s)    | Amy-Leigh DAVIS, Elonia MARTIN                                                                                                                                                                                                                                                                                                                                                                             |
| Mercy Hospital of Buffalo        | Principal Investigator  | Catalina IONITA                                                                                                                                                                                                                                                                                                                                                                                            |
|                                  | Co-Investigator(s)      | Lee GUTERMAN, Amy HEYDEN, Peterkin LEE-KWEN, Lorianne PEREIRA                                                                                                                                                                                                                                                                                                                                              |
|                                  | Study Coordinator(s)    | Cheryl CONOVER, Shirley DUANE, Nicole ERNST, Kathy PARKES                                                                                                                                                                                                                                                                                                                                                  |
| MetroHealth Medical Center       | Principal Investigator  | Joseph HANNA                                                                                                                                                                                                                                                                                                                                                                                               |
|                                  | Co-Investigator(s)      | Michael BAHNTGE, Boris GARBER, Jon SCHROCK, Sandra WERNER, Marc WINKELMAN                                                                                                                                                                                                                                                                                                                                  |
|                                  | Study Coordinator(s)    | Dana COOK                                                                                                                                                                                                                                                                                                                                                                                                  |
| Miami Valley Hospital            | Principal Investigator  | Bradley JACOBS                                                                                                                                                                                                                                                                                                                                                                                             |
|                                  | Co-Investigator(s)      | Jeri BRAUNLIN, Esteban CHENG-CHING, Ahmed FATHY, Jacob KITCHENER, Bryan LUDWIG, Elizabeth MARRIOTT, Robb SNIDER, John TERRY                                                                                                                                                                                                                                                                                |
|                                  | Study Coordinator(s)    | Angela SHOEN                                                                                                                                                                                                                                                                                                                                                                                               |
| Mission Hospital Memorial Campus | Principal Investigator  | Reid TAYLOR                                                                                                                                                                                                                                                                                                                                                                                                |
|                                  | Co-Investigator(s)      | Cindy BENTON, Robin JONES, Jeanette LARSON, Seth LARSON, Rodney LEACOCK, Margaret PERKINS, Alex SCHNEIDER, Nora-Mae-Woolie WISHAM                                                                                                                                                                                                                                                                          |
|                                  | Study Coordinator(s)    | Tracy NANNEY                                                                                                                                                                                                                                                                                                                                                                                               |
| Mount Sinai St. Luke's           | Principal Investigator  | Ji CHONG                                                                                                                                                                                                                                                                                                                                                                                                   |
|                                  | Co-Investigator(s)      | Carolyn BROCKINGTON, Elissa FORY, John NASRALLAH, Christopher TEGTMEYER                                                                                                                                                                                                                                                                                                                                    |
|                                  | Study Coordinator(s)    | Larissa BONILLA, Iris HARRIS                                                                                                                                                                                                                                                                                                                                                                               |
| Mount Sinai West                 | Principal Investigator  | Ji CHONG                                                                                                                                                                                                                                                                                                                                                                                                   |
|                                  | Co-Investigator(s)      | Carolyn BROCKINGTON, Elissa FORY, David LIEBESKIND, John NASRALLAH, Shanna PATTERSON, Christopher TEGTMEYER                                                                                                                                                                                                                                                                                                |
|                                  | Study Coordinator(s)    | Larissa BONILLA, Iris HARRIS, Renata HARTUNG                                                                                                                                                                                                                                                                                                                                                               |
| Northern Westchester Hospital    | Principal Investigator  | Akira TODO                                                                                                                                                                                                                                                                                                                                                                                                 |
|                                  | Co-Investigator(s)      | James DWYER, Miodrag VELIKOVIC                                                                                                                                                                                                                                                                                                                                                                             |
|                                  | Study Coordinator(s)    | Jodi BELLANTONI                                                                                                                                                                                                                                                                                                                                                                                            |
| NorthShore Glenbrook Hospital    | Principal Investigator  | Rima DAFER, Archie ONG                                                                                                                                                                                                                                                                                                                                                                                     |
|                                  | Co-Investigator(s)      | Fulvio GIL, Deb LYNCH, Steven MEYERS, Richard MUNSON, Archie ONG, Mark RUBIN                                                                                                                                                                                                                                                                                                                               |
|                                  | Study Coordinator(s)    | Julie ANDERSON, Sherri LOEB, Mary-Lou MAHER, Stasia Diana ROUSE                                                                                                                                                                                                                                                                                                                                            |
| NYP Weill Cornell Medical Center | Principal Investigator  | Babak NAVI                                                                                                                                                                                                                                                                                                                                                                                                 |
|                                  | Co-Investigator(s)      | Sunday CLARK, Michael CRIMMINS, Barry CZEISLER, Neha DANGAYACH, Jordan DUBOW, Matthew FINK, Brandon FOREMAN, Adam GANZMAN, Dara JAMIESON, Hooman KAMEL, Benjamin KUMMER, Richard LAPPIN, Dana LEIFER, Michael LERARIO, Atul MANGLA, Saad MIR, Sammy PISHANIDAR, Daniel SACCHETTI, Joseph SAFDIEH, Alan SEGAL, Jennifer SEVUSH, Rahul SHARMA, Natalie WEATHERED, Halina WHITE, Christopher ZAMMIT, Yi ZHANG |
|                                  | Study Coordinator(s)    | Ryna MATHIAS, Blagovest NIKOLOV, Entila XHORI                                                                                                                                                                                                                                                                                                                                                              |
| OSU Wexner                       | Principal Investigators | Reza BEHROUZ, Michel TORBEY                                                                                                                                                                                                                                                                                                                                                                                |

|                                        |                         |                                                                                                                                                                                                                                                                                                 |
|----------------------------------------|-------------------------|-------------------------------------------------------------------------------------------------------------------------------------------------------------------------------------------------------------------------------------------------------------------------------------------------|
| Medical Center                         | Co-Investigator(s)      | Bryan GOUGH, Diana GREENE-CHANDOS, Noah GROSE, Deepak GULATI, Omar HUSSEIN, Shraddha MAINALI, Andrew SLIVKA, Karina WOODLING                                                                                                                                                                    |
|                                        | Study Coordinator(s)    | Julie AGRIESTI, Laura BUCHWALDER, Sarah KOCH, Areej TARIQ                                                                                                                                                                                                                                       |
| Palmetto Health Richland               | Principal Investigator  | Souvik SEN                                                                                                                                                                                                                                                                                      |
|                                        | Co-Investigator(s)      | Xiao Michelle ANDROULAKIS, Tom FABER, Bill GERARD, David HAMMETT, Priyantha HERATH, Te-Long HWANG, Sonal MEHTA, Davit MRELASHVILI, Paisith PIRIYAWAT, James SELPH, Swamy VENKATESH                                                                                                              |
|                                        | Study Coordinator(s)    | Kyrra HALL, Evelyn KENNEDY, Shelley LAIRD                                                                                                                                                                                                                                                       |
| Park Nicollet Methodist Hospital       | Principal Investigators | John DAVENPORT, Matthew OSTRANDER                                                                                                                                                                                                                                                               |
|                                        | Co-Investigator(s)      | Krista MELVIN                                                                                                                                                                                                                                                                                   |
|                                        | Study Coordinator(s)    | Dianna MARTIN                                                                                                                                                                                                                                                                                   |
| Parkland Hospital                      | Principal Investigator  | Mark JOHNSON                                                                                                                                                                                                                                                                                    |
|                                        | Co-Investigator(s)      | Mark ALBERTS, Chirantan BANERJEE, Paul HANSEN, Yathish HARALUR SREEKANTIAH, Rashedul HASAN, Jessica LEE, Alejandro MAGADAN, Tami SALAHUDDIN, Ty SHANG, Fazeel SIDDIQUI, Worthy WARNACK                                                                                                          |
|                                        | Study Coordinator(s)    | Jan CAMERON-WATTS, Naomie GATHUA                                                                                                                                                                                                                                                                |
| Parkview Regional Medical Center       | Principal Investigator  | Fen-Lei CHANG                                                                                                                                                                                                                                                                                   |
|                                        | Co-Investigator(s)      | Ahmed AL HAMDIA, Thomas BANAS, Madhav BHAT, Marlene BULTEMEYER, TJ CURFMAN, Ajay GUPTA, Atiya KHAN, Jessica KNIRK, Paul LATER, Nils MUELLER-KRONAST, James STEVENS                                                                                                                              |
|                                        | Study Coordinator(s)    | Sue BUDZON, Jeanne CAROL                                                                                                                                                                                                                                                                        |
| Penn State Hershey Medical Center      | Principal Investigator  | Raymond REICHWEIN                                                                                                                                                                                                                                                                               |
|                                        | Co-Investigator(s)      | Natalie AUCUTT-WALTER, Kerstin BETTERMANN, Mohammad EL-GHANEM, Prabhu EMMADY, David ERMAK, Michelle FISCHER, Kevin GARDNER, David GOOD, Muhammad IBRAHIMI, James LEAMING                                                                                                                        |
|                                        | Study Coordinator(s)    | Kimbra HITZ                                                                                                                                                                                                                                                                                     |
| Presence Saint Joseph Medical Center   | Principal Investigator  | Aamir BADRUDDIN                                                                                                                                                                                                                                                                                 |
|                                        | Co-Investigator(s)      | Kaiz ASIF, Sherman CHEN, Jennifer JOHANSEN, Dhru PANDYA                                                                                                                                                                                                                                         |
|                                        | Study Coordinator(s)    | Lynn MCLENNAN, Laura PAGANESSI                                                                                                                                                                                                                                                                  |
| Providence Portland Medical Center     | Principal Investigators | Amit KANSARA                                                                                                                                                                                                                                                                                    |
|                                        | Co-Investigator(s)      | Cheri BELLING, Archit BHATT, Cesar David CACERES, Diane CLARK, Sandy DANCER, Amandeep DHILLON, Braidon FREEMAN, Lilith JUDD, Theodore LOWENKOPF, Bethany MCCLENATHAN, Paula PRINCE, John ROBISON, Andrew RONTAL, Tomoko SAMPSON, Biggya SAPKOTA, Tanya SCHEIBE-MIREK, Lisa YANASE, John ZURASKY |
|                                        | Study Coordinator(s)    | Emily JOHNSON, Darren LARSEN, Alexis YOUNG, Courtney ZERIZEF                                                                                                                                                                                                                                    |
| Providence Sacred Heart Medical Center | Principal Investigator  | Madeleine GERAGHTY                                                                                                                                                                                                                                                                              |
|                                        | Co-Investigator(s)      | Kathryn AL-HAFIAN, Esther RAWNER                                                                                                                                                                                                                                                                |
|                                        | Study Coordinator(s)    | Beth AARON, Truman CANTRELL                                                                                                                                                                                                                                                                     |

Providence St.

Principal Investigators

Amit KANSARA

|                                   |                                                                      |                                                                                                                                                                                                                                                                                                                                                                                                                                                                                                                                                                                                    |
|-----------------------------------|----------------------------------------------------------------------|----------------------------------------------------------------------------------------------------------------------------------------------------------------------------------------------------------------------------------------------------------------------------------------------------------------------------------------------------------------------------------------------------------------------------------------------------------------------------------------------------------------------------------------------------------------------------------------------------|
| Vincent Medical Center            | Co-Investigator(s)                                                   | Cheri BELLING, Archit BHATT, Cesar David CACERES, Diane CLARK, Sandy DANCER, Amandeep DHILLON, Braidon FREEMAN, Lilith JUDD, Theodore LOWENKOPF, Bethany MCCLENATHAN, Paula PRINCE, John ROBISON, Andrew RONTAL, Tomoko SAMPSON, Biggya SAPKOTA, Tanya SCHEIBE-MIREK, Lisa YANASE, John ZURASKY                                                                                                                                                                                                                                                                                                    |
|                                   | Study Coordinator(s)                                                 | Emily JOHNSON, Darren LARSEN, Alexis YOUNG, Courtney ZERIZEF                                                                                                                                                                                                                                                                                                                                                                                                                                                                                                                                       |
| Rochester General Hospital        | Principal Investigators<br>Co-Investigator(s)                        | Scott BURGIN, Kelly MATMATI<br>Jeffrey BURDETTE, Candice JOB, Tammy MAHER, Celia MCINTOSH, Lawrence SAMKOFF, Kathleen SCHINDLER                                                                                                                                                                                                                                                                                                                                                                                                                                                                    |
|                                   | Study Coordinator(s)                                                 | Cheryl WEBER                                                                                                                                                                                                                                                                                                                                                                                                                                                                                                                                                                                       |
| Ronald Reagan UCLA Medical Center | Principal Investigator<br>Co-Investigator(s)                         | Sidney STARKMAN<br>Linda ABCEDE, Peter ADAMCZYK, Allison ARCH, Mersedeh BAHROSSEINI, Mateo CALDERON-ARNULPHI, Arun CHHABRA, Chuan Frances FAN, Lindsey FRISCHMANN, Nathan GAINES, Jason HINMAN, Josephine HUANG, Doojin KIM, Conrad LIANG, David LIEBESKIND, Konark MALHOTRA, Neil MALUSTE, Michael MCMANUS, Royya MODIR, Kwan NG, Alireza NOORIAN, May NOUR, Bruce OVBIAGELE, Lucas RAMIREZ, Neal RAO, Rado RAYCHEV, Melissa REIDER-DEMER, Jeffrey SAVER, Latisha SHARMA, Sunil SHETH, Parampreet SINGH, Sarah SONG, XianNan TANG, Aaron TANSY, Jason TARPLEY, Anita TIPIRNENI, Anil YALLAPRAGADA |
|                                   | Study Coordinator(s)                                                 | Ileana GRUNBERG, Judy GUZY                                                                                                                                                                                                                                                                                                                                                                                                                                                                                                                                                                         |
| Saint Barnabas Medical Center     | Principal Investigators<br>Study Coordinator(s)                      | Danielle HASKINS, Deviyani MEHTA<br>Kelly ROE                                                                                                                                                                                                                                                                                                                                                                                                                                                                                                                                                      |
|                                   | Principal Investigator<br>Co-Investigator(s)                         | Michael KAMINSKI<br>Robert FALLIS, James FLEMING, Frank LAFRANCHISE, Subir PRASAD, Timothy UPCHURCH                                                                                                                                                                                                                                                                                                                                                                                                                                                                                                |
|                                   | Study Coordinator(s)                                                 | Diana COMAN, Marie PAYNE                                                                                                                                                                                                                                                                                                                                                                                                                                                                                                                                                                           |
| San Antonio Community Hospital    | Principal Investigator<br>Co-Investigator(s)                         | Faisal QAZI<br>James ROSENTHAL                                                                                                                                                                                                                                                                                                                                                                                                                                                                                                                                                                     |
|                                   | Study Coordinator(s)                                                 | Satish SOOD                                                                                                                                                                                                                                                                                                                                                                                                                                                                                                                                                                                        |
|                                   | Principal Investigator<br>Co-Investigator(s)<br>Study Coordinator(s) | Mauricio CONCHA<br>Julio CANTERO, Kyle RUFFING, Leonie VAN PASSEL<br>Daniel HERNANDEZ, Jeanette WILSON                                                                                                                                                                                                                                                                                                                                                                                                                                                                                             |
| Scripps Mercy Hospital San Diego  | Principal Investigator<br>Co-Investigator(s)                         | Royya MODIR<br>Kunal AGRAWAL, Maysun ALI, Kevin ATTENHOFER, Robert CLAYCOMB, Thomas HEMMEN, Nabeel HERIAL, James HO, Branko HUISA, Abhishek LUNAGARIYA, Brett MEYER, Dawn MEYER, Rajiv NARULA, David NGUYEN, Lindsay OLSON-MACK, Mohsen PIRASTEHFAR, Hami RAMANI, Belma SADIKOVIC, Konrad SCHLICK, Pradeep SELVAN, Gilda TAFRESHI                                                                                                                                                                                                                                                                  |
|                                   | Study Coordinator(s)                                                 | Brittney LEHMANN, Karen RAPP, Kathleen RICKES, Kristin WOODS                                                                                                                                                                                                                                                                                                                                                                                                                                                                                                                                       |
| Sentara Norfolk                   | Principal Investigator                                               | Richard ZWEIFLER                                                                                                                                                                                                                                                                                                                                                                                                                                                                                                                                                                                   |

|                                                      |                                                                       |                                                                                                                                                                                                                                                                         |
|------------------------------------------------------|-----------------------------------------------------------------------|-------------------------------------------------------------------------------------------------------------------------------------------------------------------------------------------------------------------------------------------------------------------------|
| General Hospital                                     | Co-Investigator(s)<br>Study Coordinator(s)                            | Pamela EVANS, Bruce LO, Renee-Scott WALKER<br>Samantha BRIGHT, Stacey CUMMINGS, Pam HOLLSTEN, Ana ROLDAN                                                                                                                                                                |
| Southern Illinois University Memorial Medical Center | Principal Investigator<br>Co-Investigator(s)<br>Study Coordinator(s)  | Fazeel SIDDIQUI<br>Tamer ABDELHAK, Nicole ATWOOD, Rodger ELBLE, Sushant KALE, Sajjad MUEED, Valeriy SABODASH, Amita SINGH, Zeng WANG<br>Sally FRITZ, Dolly KELLEY                                                                                                       |
| Sparrow Hospital                                     | Principal Investigator<br>Co-Investigator(s)<br>Study Coordinator(s)  | Syed HUSSAIN<br>Vibhav BANSAL, Vishal JANI, Mounzer KASSAB, Malathi RAO, Anmar RAZAK, Gautam SACHDEVA, Adan SAFDAR<br>Erin SHELL                                                                                                                                        |
| St. Anthony Hospital                                 | Principal Investigator<br>Co-Investigator(s)<br>Study Coordinator(s)  | Mark MURRAY<br>Christy CASPER, Bill COPLIN, Alex GRAVES, Rick SMITH<br>Sheryl GIAMBARTOLOMEI                                                                                                                                                                            |
| St. David's Medical Center                           | Principal Investigators<br>Co-Investigator(s)<br>Study Coordinator(s) | Kent ELLINGTON, Johanna MORTON, Angel PULIDO, James WALDRON<br>Hana AUBRECHTOVA, Ray BOGITCH, Elizabeth CARROLL, Albert HORN, David MORLEDGE<br>Sergio AVILA-MICHEL, Kaelyn KAPPELER, Karissa MORTON                                                                    |
| St. John's Hospital                                  | Principal Investigator<br>Co-Investigator(s)<br>Study Coordinator(s)  | Fazeel SIDDIQUI<br>Rodger ELBLE, Sushant KALE, Sajjad MUEED, Valeriy SABODASH, Amita SINGH, Zeng WANG<br>Sally FRITZ, Dolly KELLEY                                                                                                                                      |
| St. Jude Medical Center                              | Principal Investigator<br>Co-Investigator(s)<br>Study Coordinator(s)  | Stephen WALDMAN<br>Kiran BATH, Anthony CIABARRA, Johnson MOON<br>Sheraz MOSSA                                                                                                                                                                                           |
| St. Louis University Hospital                        | Principal Investigator<br>Co-Investigator(s)<br>Study Coordinator(s)  | Salvador CRUZ-FLORES<br>Aninda ACHARYA, Amer ALSHEKHLI, Charles CALLISON, Tagann CHAISAM, Randall EDGELL, Eli FEEN, Sushant KALE, Jacob KITCHENER, Sonal MEHTA, Paisith PIRIYAWAT, Nirav VORA<br>Susan BROWN, Eve HOLZEMER                                              |
| Strong Memorial Hospital                             | Principal Investigators<br>Co-Investigator(s)<br>Study Coordinator(s) | Adam KELLY, David REMPE<br>Curtis BENESCH, Scott BURGIN, Ania BUSZA, Justin CHANDLER, Gaurav DIGHE, Fulvio GIL, Todd HOLMQUIST, Michael MANCHAK, Anthony NOTO, Jennifer RICHARD, Jorge RISCO, Bogachan SAHIN, Eugene SCHARF, Roople UNIA<br>Heather FINLEY, Dawn MARTIN |
| Summa Akron City Hospital                            | Principal Investigator<br>Co-Investigator(s)<br>Study Coordinator(s)  | Susana BOWLING<br>Mary-Colleen BHALLA, Joao GOMES, Kristy JACOBSON, Kirk STIFFLER, Scott WILBER<br>Kathy CUNNINGHAM, Linette MERCER, Robin ROTH, Rachelle SCHARSU, Patricia WOOD                                                                                        |
| SUNY Upstate                                         | Principal Investigator                                                | Julius-Gene LATORRE                                                                                                                                                                                                                                                     |

|                                           |                         |                                                                                                                                                                                                                                                                                                                                                                                                           |
|-------------------------------------------|-------------------------|-----------------------------------------------------------------------------------------------------------------------------------------------------------------------------------------------------------------------------------------------------------------------------------------------------------------------------------------------------------------------------------------------------------|
| Medical University                        | Co-Investigator(s)      | Ahmad AHMAD, Sanam ANWER, Ilya BRAGIN, Elnour ELWALEED, Ziad EL-ZAMMAR, Anna Monica FERMIN, Shahnawaz KARIM, Michael MENDOZA, Mubashir PERVEZ, Wysem RAMDANI, Rajbeer SANGHA, Elena SCHMIDT                                                                                                                                                                                                               |
|                                           | Study Coordinator(s)    | Alisha HARTWELL, Muhammad IQBAL, Iulia MOVILEANU,                                                                                                                                                                                                                                                                                                                                                         |
| Sutter Medical Center                     | Principal Investigators | Wendy BROWN, Mohammad-Asim MAHMOOD                                                                                                                                                                                                                                                                                                                                                                        |
|                                           | Co-Investigator(s)      | Peter ADAMCZYK, Richard ATKINSON                                                                                                                                                                                                                                                                                                                                                                          |
|                                           | Study Coordinator(s)    | Barbara WELCHER                                                                                                                                                                                                                                                                                                                                                                                           |
| Sutter Memorial Hospital                  | Principal Investigator  | Wendy BROWN                                                                                                                                                                                                                                                                                                                                                                                               |
|                                           | Co-Investigator(s)      | Richard ATKINSON                                                                                                                                                                                                                                                                                                                                                                                          |
|                                           | Study Coordinator(s)    | Barbara WELCHER                                                                                                                                                                                                                                                                                                                                                                                           |
| Sutter Roseville Medical Center           | Principal Investigators | Wendy BROWN, Mohammad-Asim MAHMOOD                                                                                                                                                                                                                                                                                                                                                                        |
|                                           | Co-Investigator(s)      | Richard ATKINSON                                                                                                                                                                                                                                                                                                                                                                                          |
|                                           | Study Coordinator(s)    | Teresa CARTER, Michele GUILLEN                                                                                                                                                                                                                                                                                                                                                                            |
| Swedish Medical Center                    | Principal Investigator  | Ira CHANG                                                                                                                                                                                                                                                                                                                                                                                                 |
|                                           | Co-Investigator(s)      | Russell BARTT, Christian BURRELL, Christopher FANALE, Ananda FINE, Judd JENSEN, Emily LAMPE, Kathryn MCCARTHY (LEONARD), Amy NIEBERLEIN (LARSON), Robert PRATT, Stacy SHINE, Byron Rod SPENCER, Rebecca VANVLIET, Jeffrey WAGNER, Adrienne WALSH, Michelle WHALEY                                                                                                                                         |
|                                           | Study Coordinator(s)    | Paula FISK, Tyler IRANI, Lenden NEEPER, Alicia NOVAK, Jeanne SWANSON                                                                                                                                                                                                                                                                                                                                      |
| Texas Health Presbyterian Hospital Dallas | Principal Investigator  | Samir SHAH                                                                                                                                                                                                                                                                                                                                                                                                |
|                                           | Co-Investigator(s)      | Nicholas ABSALOM, Karen SACKS                                                                                                                                                                                                                                                                                                                                                                             |
|                                           | Study Coordinator(s)    | Shelley LONG, Michelle MORGAN                                                                                                                                                                                                                                                                                                                                                                             |
| The Mount Sinai Hospital                  | Principal Investigator  | Jesse WEINBERGER                                                                                                                                                                                                                                                                                                                                                                                          |
|                                           | Co-Investigator(s)      | Yu-Feng-Yvonne CHAN, Deborah HOROWITZ, Frank KIM, Aviva LUBIN, Kara SHEINART, Stanley TUHRIM, Qingliang WANG                                                                                                                                                                                                                                                                                              |
|                                           | Study Coordinator(s)    | Sandra AUGUSTINE                                                                                                                                                                                                                                                                                                                                                                                          |
| The Queen's Medical Center                | Principal Investigators | Douglas FRANZ, Rony SALEM, Douglas VALENTA                                                                                                                                                                                                                                                                                                                                                                |
|                                           | Co-Investigator(s)      | Matthew KOENIG, Kazuma NAKAGAWA                                                                                                                                                                                                                                                                                                                                                                           |
|                                           | Study Coordinator(s)    | Denise DITTRICH, Lyle OSHITA, Tina ROBERTSON, Tracy STERN                                                                                                                                                                                                                                                                                                                                                 |
| UCSD Health La Jolla                      | Principal Investigator  | Dawn MEYER                                                                                                                                                                                                                                                                                                                                                                                                |
|                                           | Co-Investigator(s)      | Kunal AGRAWAL, Maysun ALI, Kevin ATTENHOFER, Nhu BRUCE, Jessica CHOE, Robert CLAYCOMB, Amy GUZIK, Lovella HAILEY, Thomas HEMMEN, Nabeel HERIAL, James HO, Branko HUISA, Kiet LOC, Abhishek LUNAGARIYA, Brett MEYER, Royya MODIR, Melissa MORTIN, Rajiv NARULA, William NEIL, David NGUYEN, Bruce OVBIAGELE, Mohsen PIRASTEHFAR, Hami RAMANI, Belma SADIKOVIC, Konrad SCHLICK, Pradeep SELVAN, Ajeet SODHI |
|                                           | Study Coordinator(s)    | Nancy KELLY, Brittney LEHMANN, Karen RAPP, Kathleen RICKES, Kristin WOODS                                                                                                                                                                                                                                                                                                                                 |
| UF Health                                 | Principal Investigator  | Scott SILLIMAN                                                                                                                                                                                                                                                                                                                                                                                            |

|                                        |                         |                                                                                                                                                                                                                                                                                                                                                   |
|----------------------------------------|-------------------------|---------------------------------------------------------------------------------------------------------------------------------------------------------------------------------------------------------------------------------------------------------------------------------------------------------------------------------------------------|
| Jacksonville                           | Co-Investigator(s)      | Nader ANTONIOS, Ryan CROOKS, Marianne DE LIMA, Mary-Ann FARES, Imran FAROOQUI, Constance KATSAFANAS, Zeshaun KHAWAJA, Somphanh KHOUSAKOUN, Shannon LABOY, Sherif MAKAR, Robert MANNEL, Fatima MILFRED, Omar MOORE, Raid OSSI, Wally Jamie PLANTE, Fatoumata SAKHO, Adil ZIA                                                                       |
|                                        | Study Coordinator(s)    | Judy BULACAN, Rhonda CALHOUN, Jennifer ROBERTS, Mary STEGMAIER                                                                                                                                                                                                                                                                                    |
| UF Health Shands Hospital              | Principal Investigator  | Anna KHANNA                                                                                                                                                                                                                                                                                                                                       |
|                                        | Co-Investigator(s)      | Ganesh ASAITHAMBI, Julie BERTHY, Haitham DABABNEH, Scott DELLORSO, Waldo GUERRERO, Paul MACDONALD, Katharine MASKAS, Walter MORGAN, Nandakumar NAGARAJA, Arash NAZIRIPOUR, Swetha RENATI, Christian ROSADO, Vishnumurthy SHUSHRUTHA HEDNA, Michael SMITH, Arnaldo VELEZ, Michael WATERS, Melissa WEAVER, Christina WILSON, Jindong XU, Teddy YOUN |
|                                        | Study Coordinator(s)    | Rosie KIZZA, Teresa LYLES, Stacy MCCOMBS, Stacy MERRITT, David PARFITT, Sonisha WARREN                                                                                                                                                                                                                                                            |
| UMASS Memorial Medical Center          | Principal Investigator  | Majaz MOONIS                                                                                                                                                                                                                                                                                                                                      |
|                                        | Co-Investigator(s)      | Richard GODDEAU, Adalia JUN-O'CONNELL                                                                                                                                                                                                                                                                                                             |
|                                        | Study Coordinator(s)    | Melissa ADAMS, Barbara GLIDDEN                                                                                                                                                                                                                                                                                                                    |
| University of Alabama Hospital         | Principal Investigators | Andrei ALEXANDROV, Toby GROPEN, Gyanendra KUMAR                                                                                                                                                                                                                                                                                                   |
|                                        | Co-Investigator(s)      | Karen ALBRIGHT, Asad CHAUDHARY, Michael LYERLY, Andrey SAMAL, Kara SANDS, Danny TKATCH                                                                                                                                                                                                                                                            |
|                                        | Study Coordinator(s)    | Brandie CLINE, Melissa GAZI, Lynn MERRITT, April SISSON                                                                                                                                                                                                                                                                                           |
| University of Colorado Hospital        | Principal Investigator  | Jennifer SIMPSON                                                                                                                                                                                                                                                                                                                                  |
|                                        | Co-Investigator(s)      | David CASE, Christy CASPER, Dana COUTTS, Alexander GRAVES, William JONES, Pearce KORB, Michelle LEPPERT, Robert NEUMANN, Daniel PASTULA, Sharon POISSON, Angel PULIDO, Daniel VELA DUARTE, Matthew WEST                                                                                                                                           |
|                                        | Study Coordinator(s)    | April BRYANT, Marissa HUDAK, Kaaren LINDSAY, Alexander STEIN, Ildiko TOROK                                                                                                                                                                                                                                                                        |
| University of Illinois Hospital        | Principal Investigators | Aslam KHAJA, Neelofer SHAFI, Fernando TESTAI                                                                                                                                                                                                                                                                                                      |
|                                        | Co-Investigator(s)      | Phil GORELICK, Rebecca GRYSIEWICZ, Laura PEDELTY, Fernando TESTAI                                                                                                                                                                                                                                                                                 |
|                                        | Study Coordinator(s)    | Maureen HILLMANN                                                                                                                                                                                                                                                                                                                                  |
| University of Iowa Hospitals & Clinics | Principal Investigator  | Harold ADAMS                                                                                                                                                                                                                                                                                                                                      |
|                                        | Co-Investigator(s)      | Salman AL JERDI, Sami AL KASAB, Sudeepta DANDAPAT, Patricia DAVIS, Michael FROEHLER, Waldo GUERRERO, Emily JAKSICH, Enrique LEIRA, Kaustubh LIMAYE, Jeffrey MILLER, Nandakumar NAGARAJA, Santiago ORTEGA-GUITERREZ, Connie PIEPER, Edgar SAMANIEGO, Ali SHEHARYAR, Allison VOSS                                                                   |
|                                        | Study Coordinator(s)    | Heena OLALDE, Jeri SIEREN                                                                                                                                                                                                                                                                                                                         |
| University of Louisville Hospital      | Principal Investigators | Wei LIU, Anand VAISHNAV                                                                                                                                                                                                                                                                                                                           |
|                                        | Co-Investigator(s)      | Alex ABOU-CHEBL, Kerri REMMEL, Jignesh SHAH, Vincent TRUONG, Michael WILDER                                                                                                                                                                                                                                                                       |

|                                                 |                         |                                                                                                                                                                                                                                                                                                                                                                                                                                                                                                                                                                                                                                                                                                                                                                                                                                                                                                                                                                                                                                                                                                                     |
|-------------------------------------------------|-------------------------|---------------------------------------------------------------------------------------------------------------------------------------------------------------------------------------------------------------------------------------------------------------------------------------------------------------------------------------------------------------------------------------------------------------------------------------------------------------------------------------------------------------------------------------------------------------------------------------------------------------------------------------------------------------------------------------------------------------------------------------------------------------------------------------------------------------------------------------------------------------------------------------------------------------------------------------------------------------------------------------------------------------------------------------------------------------------------------------------------------------------|
|                                                 | Study Coordinator(s)    | Ann JERDE                                                                                                                                                                                                                                                                                                                                                                                                                                                                                                                                                                                                                                                                                                                                                                                                                                                                                                                                                                                                                                                                                                           |
| University of North Carolina                    | Principal Investigator  | Natalie AUCUTT-WALTER                                                                                                                                                                                                                                                                                                                                                                                                                                                                                                                                                                                                                                                                                                                                                                                                                                                                                                                                                                                                                                                                                               |
|                                                 | Co-Investigator(s)      | Aaron ABATE, Anne BECKWITH, Octavio DE MARCHENA, David HUANG, Anahit MEHRABYAN, Leonardo MORANTES, Matthew OSTRANDER, Matthew SMITH, Michael WANG, Susan WILSON                                                                                                                                                                                                                                                                                                                                                                                                                                                                                                                                                                                                                                                                                                                                                                                                                                                                                                                                                     |
|                                                 | Study Coordinator(s)    | Sierra MARINO, Roxanne POOLE                                                                                                                                                                                                                                                                                                                                                                                                                                                                                                                                                                                                                                                                                                                                                                                                                                                                                                                                                                                                                                                                                        |
| University of Washington Medical Center         | Principal Investigator  | David TIRSCHWELL                                                                                                                                                                                                                                                                                                                                                                                                                                                                                                                                                                                                                                                                                                                                                                                                                                                                                                                                                                                                                                                                                                    |
|                                                 | Co-Investigator(s)      | Claire CREUTZFELDT, Rizwan KALANI, Marlan KAY                                                                                                                                                                                                                                                                                                                                                                                                                                                                                                                                                                                                                                                                                                                                                                                                                                                                                                                                                                                                                                                                       |
|                                                 | Study Coordinator(s)    | Allison KUNZE, Wesley PLINKE, Glenn SCHUBERT, Patricia TANZI                                                                                                                                                                                                                                                                                                                                                                                                                                                                                                                                                                                                                                                                                                                                                                                                                                                                                                                                                                                                                                                        |
| University of Wisconsin University Hospital     | Principal Investigators | Jim SVENSON, Natalie WHEELER                                                                                                                                                                                                                                                                                                                                                                                                                                                                                                                                                                                                                                                                                                                                                                                                                                                                                                                                                                                                                                                                                        |
|                                                 | Co-Investigator(s)      | Eric ADELMAN, Azam AHMED, Tom AUFDERHEIDE, Edward-Luke BRADBURY, Marcus CHACON, Jamie ELLIOTT, Azita HAMEDANI, Matthew JENSEN, Krishna MYLAVARAPU, Justin SATTIN, Erick TARULA                                                                                                                                                                                                                                                                                                                                                                                                                                                                                                                                                                                                                                                                                                                                                                                                                                                                                                                                      |
|                                                 | Study Coordinator(s)    | Travis DORAN, Ashley HARRIS, Stephanie WILBRAND                                                                                                                                                                                                                                                                                                                                                                                                                                                                                                                                                                                                                                                                                                                                                                                                                                                                                                                                                                                                                                                                     |
| UT Southwestern Zale Lipshy University Hospital | Principal Investigator  | Mark JOHNSON                                                                                                                                                                                                                                                                                                                                                                                                                                                                                                                                                                                                                                                                                                                                                                                                                                                                                                                                                                                                                                                                                                        |
|                                                 | Co-Investigator(s)      | Mark ALBERTS, Mehari GEBREYOHANNAS, Jessica LEE, Alejandro MAGADAN, Ty SHANG                                                                                                                                                                                                                                                                                                                                                                                                                                                                                                                                                                                                                                                                                                                                                                                                                                                                                                                                                                                                                                        |
|                                                 | Study Coordinator(s)    | Jan CAMERON-WATTS, Naomie GATHUA                                                                                                                                                                                                                                                                                                                                                                                                                                                                                                                                                                                                                                                                                                                                                                                                                                                                                                                                                                                                                                                                                    |
| UVA Medical Center                              | Principal Investigator  | Nina SOLENSKI                                                                                                                                                                                                                                                                                                                                                                                                                                                                                                                                                                                                                                                                                                                                                                                                                                                                                                                                                                                                                                                                                                       |
|                                                 | Co-Investigator(s)      | Leah ACOSTA, James ADDINGTON, Jimmy BERTHAUD, Halley BRIGLIA, Michael BROGAN, Michelle BROWN, Joseph CARRERA, Micaela CHATMAN, Christina CHEE, Nicole CHIOTA-MCCOLLUM, Allison CROWELL, Jason CROWELL, Bryan CUPKA, Alex DALRYMPLE, Maria DIAZ-ORDONEZ, Stephen DONAHUE, Byran ECKERLE, Matthew EHRlich, Matthew ELLIOTT, Erin FOFF, Kaanchan GANGAL, Daryl GRESS, Christopher GROTH, Rahul GUHA, Amy GUZIK, Kelly GWATHMEY, Clark HALEY, Holly HENSLEY-JUDGE, Zsofia HOLE, Jasmin JO, Michelle JOHANSEN, Karen C. JOHNSTON, Sarah JONES, Kiran KANTH, Scott KOHLER, Noah KOLB, Greg KUHLMAN, David LAPIDES, Lauren MAHONEY, Shaneela MALIK, Sneha MANTRI, Matthew MCCONNELL, Mark MCDONALD, Prachi MEHNDIRATTA, Barnett NATHAN, Kathryn NEVEL, Whitney POLLOCK, Ryon POSTON, Surabhi RANJAN, Jeffrey RATLIFF, Chad SAUNDERS, Reza SEYEDSADJADI, Mohamed SHARABY, Sherita SMITH, Brian SORACE, Andrew SOUTHERLAND, Mohammad SUNBULLI, Joanna SUSKI, Lauren TALMAN, David TAPLINGER, Jennie TAYLOR, Liana THEROUX, Sarah TISEL, Lisa TORAN, Christopher VACHON, Hua WANG, Melanie WARD, Bradford WORRALL, Julie ZHOU |
|                                                 | Study Coordinator(s)    | Theresa ALTHERR, Tracey BLOUNT, Amy FANSLER, Colleen HARMAN, Julia KRUPA, Claire McKinley                                                                                                                                                                                                                                                                                                                                                                                                                                                                                                                                                                                                                                                                                                                                                                                                                                                                                                                                                                                                                           |
| Vanderbilt                                      | Principal Investigator  | Howard KIRSHNER                                                                                                                                                                                                                                                                                                                                                                                                                                                                                                                                                                                                                                                                                                                                                                                                                                                                                                                                                                                                                                                                                                     |



|                                       |                         |                                                                                                                                                                                              |
|---------------------------------------|-------------------------|----------------------------------------------------------------------------------------------------------------------------------------------------------------------------------------------|
| University Hospital                   | Co-Investigator(s)      | Mark BAKER, Brandi FRENCH, Ajay GUPTA, Rishi GUPTA, Lisa HERMANN, Shilpi MITTAL, Anne O'DUFFY, Derek RIEBAU, Eli ZIMMERMAN                                                                   |
|                                       | Study Coordinator(s)    | Diane BROWN, Abbie HUDSON, Morgan PITTMAN, Dima SBENATY                                                                                                                                      |
| Wake Forest Baptist Medical Center    | Principal Investigator  | Patrick REYNOLDS                                                                                                                                                                             |
|                                       | Co-Investigator(s)      | Martinson ARNAN, Sanam BAGHSHOMALI, Edward-Luke BRADBURY, Cheryl BUSHNELL, Jeffrey CRAIG, Amy GUZIK, David LEFKOWITZ, Charles TEGELER                                                        |
|                                       | Study Coordinator(s)    | Barbara ANDERSON, LaGina BARKER, Sandra NORONA                                                                                                                                               |
| Watauga Medical Center                | Principal Investigator  | Jeffrey CRITTENDEN                                                                                                                                                                           |
|                                       | Co-Investigator(s)      | Burton KENNEDY                                                                                                                                                                               |
|                                       | Study Coordinator(s)    | Shannon STOUT                                                                                                                                                                                |
| Winthrop University Hospital          | Principal Investigators | Sarah CHERIAN, Elzbieta WIRKOWSKI                                                                                                                                                            |
|                                       | Co-Investigator(s)      | Karin ANTAKY, Feliks KOYFMAN, Kathleen MICHEL, Jay YASEN                                                                                                                                     |
|                                       | Study Coordinator(s)    | Kim BYRNES                                                                                                                                                                                   |
| WVU Healthcare Ruby Memorial Hospital | Principal Investigators | Amelia ADCOCK, John BRICK, Claudette BROOKS                                                                                                                                                  |
|                                       | Co-Investigator(s)      | Muhammad ALVI, Erica BLACKWELL, Todd CROCCO, Christopher CUMMINGS, Desiree GORDON, Laurie GUTMANN, Martha POWER, Adrienne SALOMON, Jay SHERMAN, Matthew S. SMITH, Tanya SMITH, Hannah YETZER |

## NEUROLOGICAL EMERGENCIES TREATMENT TRIALS (NETT) INVESTIGATORS

**UNITED STATES** *NETT Hub Principal Investigators:* Opeolu ADEOYE, Tom AUFDERHEIDE, Jill BAREN, Michelle BIROS, Cliff CALLAWAY, Jan CLAASSEN, Kurt DENNINGHOFF, Nina GENTILE, Joshua GOLDSTEIN, Claude HEMPHILL, Roger HUMPHRIES, Elizabeth JONES, Steven LEVINE, Christopher LEWANDOWSKI, Joseph ORNATO, James QUINN, Sidney STARKMAN, Barney STERN, Michel TORBEY, Craig WARDEN, Robert WELCH, David WRIGHT

### ***Enrolled 100 or more patients***

| Site                                              | Role                   | Team Member                                                                                                                                                                                                                                                                                                                                                                                                                                                                                                        |
|---------------------------------------------------|------------------------|--------------------------------------------------------------------------------------------------------------------------------------------------------------------------------------------------------------------------------------------------------------------------------------------------------------------------------------------------------------------------------------------------------------------------------------------------------------------------------------------------------------------|
| <b>Hospital of the University of Pennsylvania</b> | Principal Investigator | Brett CUCCHIARA                                                                                                                                                                                                                                                                                                                                                                                                                                                                                                    |
|                                                   | Co-Investigator(s)     | Jill BAREN, Lauren BESLOW, Christina BLUM, Christopher FAVILLA, Kimberly GANNON, Koto ISHIDA, Judy JIA, Scott KASNER, Glenn KONSKY, Donna KUROWSKI, Ava LIBERMAN, Caitlin LOOMIS, Jean LUCIANO, Michael MCGARVEY, Steven MESSE, Michael MULLEN, Claude NGUYEN, Swaroop PAWAR, Jonathan RASER-SCHRAMM, Christopher RENNER, David ROSE, Igor RYBINNIK, Lauren SANSING, Neelofer SHAFI, James SIEGLER, Laura STEIN, Sally SULTAN, Jose TORRES, Louis VENTURA, Christina WILSON, QingYang YUAN, Ali ZANDIEH, Cen ZHANG |
|                                                   | Study Coordinator(s)   | Katherine BLACKBURN (Lamond), Mary Elizabeth DESANTO                                                                                                                                                                                                                                                                                                                                                                                                                                                               |

### ***Enrolled 50-99 patients***

| Site                                      | Role                    | Team Member                                                                                                                                                                                                                                                                                                                                                                                                                                                                                                                                                                                       |
|-------------------------------------------|-------------------------|---------------------------------------------------------------------------------------------------------------------------------------------------------------------------------------------------------------------------------------------------------------------------------------------------------------------------------------------------------------------------------------------------------------------------------------------------------------------------------------------------------------------------------------------------------------------------------------------------|
| <b>Stanford University Medical Center</b> | Principal Investigators | Gregory ALBERS, Nirali VORA                                                                                                                                                                                                                                                                                                                                                                                                                                                                                                                                                                       |
|                                           | Co-Investigator(s)      | Pablo BRAVO, Marion BUCKWALTER, Charlene CHEN, Anna FINLEY-CAULFIELD, Paul GEORGE, Karen HIRSCH, Kyle HOBBS, Michael KE, Sun KIM, Prashanth KRISHNAMOHAN, Soo Young KWON, Maarten LANSBERG, Sarah LEE, Catherine LEGAULT, Adam MACLELLAN, Sharan MANN, Christina MIJALSKI, Gracia MUI, Jean-Marc OLIVOT, INDER PAUL SINGH, Reza PIRSAHELI, Divya PRABHU, Archana PURUSHOTHAM, James QUINN, Basit RAHIM, Adam RIZVI, Edgar SAMANIEGO, Neil SCHWARTZ, Christopher SOUTHWOOD, Ilanit SPOKOYNY, Waimei Amy TAI, Mohamed TELEB, Jenny TSAI, Christie TUNG, Chitra VENKATASUBRAMANIAN, Christine WIJMAN |
|                                           | Study Coordinator(s)    | Christine KELLER, Rosen MANN, Anita VISWESWARAN                                                                                                                                                                                                                                                                                                                                                                                                                                                                                                                                                   |
| <b>Grady Memorial</b>                     | Principal Investigator  | Michael ROSS                                                                                                                                                                                                                                                                                                                                                                                                                                                                                                                                                                                      |

|                                                        |                         |                                                                                                                                                                                                                                                                                                                                                                                                                                                                                                                                                                                                                                                                                                                                                                                                                                                                                                                                                                    |
|--------------------------------------------------------|-------------------------|--------------------------------------------------------------------------------------------------------------------------------------------------------------------------------------------------------------------------------------------------------------------------------------------------------------------------------------------------------------------------------------------------------------------------------------------------------------------------------------------------------------------------------------------------------------------------------------------------------------------------------------------------------------------------------------------------------------------------------------------------------------------------------------------------------------------------------------------------------------------------------------------------------------------------------------------------------------------|
| <b>Hospital</b>                                        | Co-Investigator(s)      | Aaron ANDERSON, Anika BACKSTER, Samir BELAGAJE, Elizabeth ARROLL, Robin DHARIA, Adam EDWARDS, Tamara ESPINOZA, Michael FRANKEL, Minas GEBRU, Rishi GUPTA, Vijayakumar JAVALKAR, Omar KASS-HOUT, Tareq KASS-HOUT, Carlene KINGSTON, Andrey LIMA, Lisa MERCK, Fadi NAHAB, Raul NOGUEIRA, Mahmoud OBIDEEN, Anwar OSBORNE, Kumiko OWADA, Shelly OZARK, Vishal PATEL, Harrison PEARL, Haseeb RAHMAN, Jonathan RATCLIFF, Ali SAAD, Yasir SALEEM, Aaron STAYMAN, Melanie WINNINGHAM, David WRIGHT                                                                                                                                                                                                                                                                                                                                                                                                                                                                         |
|                                                        | Study Coordinator(s)    | Alex HALL, Nick STANLEY                                                                                                                                                                                                                                                                                                                                                                                                                                                                                                                                                                                                                                                                                                                                                                                                                                                                                                                                            |
| <b>NYP Columbia University Medical Center</b>          | Principal Investigator  | Joshua WILLEY                                                                                                                                                                                                                                                                                                                                                                                                                                                                                                                                                                                                                                                                                                                                                                                                                                                                                                                                                      |
|                                                        | Co-Investigator(s)      | Sachin AGARWAL, Fawaz AL MUFTI, Aws ALAWI, Ayham ALKHACHROUM, Neeraj BADJATIA, Andrew BAUERSCHMIDT, Huimahn CHOI, Jan CLAASSEN, Michael CRIMMINS, Barry CZEISLER, Elie DANCOUR, Neha DANGAYACH, Mandip DHAMOON, Charles ESENWA, Andres FERNANDEZ, Brandon FOREMAN, Shivani GHOSHAL, Randeep GILL, Emily GILMORE, Marco GONZALEZ CASTELLON, Jose GUTIERREZ, Khalid HANAFY, Gregory KAPINOS, Tomoko KITAGO, Shouri LAHIRI, Cappi LAY, Kiwon LEE, Tim LEKIC, Guillermo LINARES, Aaron LORD, Ali MAHTA, Rishi MALHOTRA, Adrian MARCHIDANN, Andrew MARTIN, Teresa MAY, Stephan MAYER, Kara R. MELMED, Alexander MERKLER, Eliza MILLER, Nicholas MORRIS, Sumiti NAYAR, Setareh S. OMRAN, Santiago ORTEGA-GUITERREZ, Gunjan PARIKH, Neal S. PARIKH, Nils PETERSEN, Jeremy RAGLAND, Alexandra REYNOLDS, Michael REZNIK, David ROH, Sara ROSTANSKI, Clio A. RUBINOS, Ayesha SHERZAI, Viktor SZEDER, Alan VELANDER, Matthew VIBBERT, Christopher ZAMMIT, Jiaying Jayne ZHANG |
|                                                        | Study Coordinator(s)    | Cristina FALO, Angela VELAZQUEZ                                                                                                                                                                                                                                                                                                                                                                                                                                                                                                                                                                                                                                                                                                                                                                                                                                                                                                                                    |
| <b>Oregon Health &amp; Science University Hospital</b> | Principal Investigator  | Helmi LUTSEP                                                                                                                                                                                                                                                                                                                                                                                                                                                                                                                                                                                                                                                                                                                                                                                                                                                                                                                                                       |
|                                                        | Co-Investigator(s)      | Noah BEADELL, Hormozd BOZORGCHAMI, Wayne CLARK, Amandeep DHILLON, Julia DURRANT, Sierra FORD, Ere HELSETH, Kory HERRICK, David HOAK, Amit KANSARA, Seth KAREUS, Robert LOWE, Theodore LOWENKOPF, Logan MCDANELD, Madeline NGUYEN, Olajide OLOGUNTOYE, Andrew RONTAL, Michelle STACEY, Courtney TAKAHASHI, Craig WARDEN, Stewart WEBER, Corey WHITE, Lisa YANASE, John ZURASKY                                                                                                                                                                                                                                                                                                                                                                                                                                                                                                                                                                                      |
|                                                        | Study Coordinator(s)    | Kelly FEEST, Jonathan FOLEY, Kali SEISLER                                                                                                                                                                                                                                                                                                                                                                                                                                                                                                                                                                                                                                                                                                                                                                                                                                                                                                                          |
| <b>Detroit Receiving Hospital</b>                      | Principal Investigators | Anthony LAGINA, Claire PEARSON                                                                                                                                                                                                                                                                                                                                                                                                                                                                                                                                                                                                                                                                                                                                                                                                                                                                                                                                     |
|                                                        | Co-Investigator(s)      | Benjamin ATKINSON, Pratik BHATTACHARYA, Seemant CHATURVEDI, William COPLIN, Angela GROVES, Amit KANSARA, Phillip LEVY, Ramesh MADHAVAN, Aniel MAJJHOO, Wazim MOHAMED, Meenakshi MUNSHI, Greg NORRIS, Brian O'NEIL, Kumar RAJAMANI, Sunitha ANTHAKUMAR, Robert SHERWIN, Kushak SUCHDEV, Ambooj TIWARI, Preet VARADE, Robert WELCH                                                                                                                                                                                                                                                                                                                                                                                                                                                                                                                                                                                                                                   |

|                                        |                                                                      |                                                                                                                                                                                                                                                                                                                                                                                                                                                                                                                                                                                                                             |
|----------------------------------------|----------------------------------------------------------------------|-----------------------------------------------------------------------------------------------------------------------------------------------------------------------------------------------------------------------------------------------------------------------------------------------------------------------------------------------------------------------------------------------------------------------------------------------------------------------------------------------------------------------------------------------------------------------------------------------------------------------------|
|                                        | Study Coordinator(s)                                                 | Farhan AYAZ, Saikat BHUIYAN, Valerie MIKA                                                                                                                                                                                                                                                                                                                                                                                                                                                                                                                                                                                   |
| <b>Temple University Hospital</b>      | Principal Investigator<br>Co-Investigator(s)                         | Nina GENTILE<br>Derek ISENBURG, Mercedes JACOBSON, Paul KATZ, Yongwoo KIM, Tim LACHMAN, Guillermo LINARES, Imama NAQVI                                                                                                                                                                                                                                                                                                                                                                                                                                                                                                      |
|                                        | Study Coordinator(s)                                                 | Patricia MCNELIS, Hannah REIMER                                                                                                                                                                                                                                                                                                                                                                                                                                                                                                                                                                                             |
| <b>Froedtert Memorial Lutheran</b>     | Principal Investigator<br>Co-Investigator(s)                         | John LYNCH<br>Tom AUFDERHEIDE, Diana BOOK, Ann HELMS, Abigail LA NOU, Marc LAZZARO, Michel TORBEY, Osama ZAIDAT                                                                                                                                                                                                                                                                                                                                                                                                                                                                                                             |
|                                        | Study Coordinator(s)                                                 | Erin BRANDENBURG, Amanda EMMRICH, Caroline HERDEMAN, Jacob LABINSKI, Melissa MENA                                                                                                                                                                                                                                                                                                                                                                                                                                                                                                                                           |
| <b>Sinai-Grace Hospital</b>            | Principal Investigators<br>Co-Investigator(s)                        | Anthony LAGINA, Claire PEARSON<br>Benjamin ATKINSON, Pratik BHATTACHARYA, Seemant CHATURVEDI, Angela GROVES, Amit KANSARA, Phillip LEVY, Ramesh MADHAVAN, Wazim MOHAMED, Meenakshi MUNSHI, Greg NORRIS, Brian O'NEIL, Kumar RAJAMANI, Robert SHERWIN, Kushak SUCHDEV, Ambooj TIWARI, Preet VARADE, Marc-Anthony VELILLA, Robert WELCH                                                                                                                                                                                                                                                                                       |
|                                        | Study Coordinator(s)                                                 | Farhan AYAZ, Saikat BHUIYAN, Valerie MIKA                                                                                                                                                                                                                                                                                                                                                                                                                                                                                                                                                                                   |
| <b>Hennepin County Medical Center</b>  | Principal Investigators<br>Co-Investigator(s)                        | Michelle BIROS, Mustapha EZZEDDINE, Tapan THACKER<br>Mohammed ALKUWAITI, Shola ALUKO, David ANDERSON, Ganesh ASAITHAMBI, Kristen BARKLOW, Michelle BIROS, Laura FOSTER, Mikayel GRIGORYAN, Ameer HASSAN, Taka HIGASHIMORI, Haitham HUSSEIN, Katherine JACOBY, Chris JANSON, Jessica JARNOT, Daraspreet KAINTH, Amir KHAN, Asif KHAN, Jae KIM, Joni KOPITZKE, Saritha KUNDOOR, Shailesh MALE, Benjamin MILLER, Haejoe PARK, Rwoof RESHI, Gustavo RODRIGUEZ, Divyajot SANDHU, Biggya SAPKOTA, Kenneth SHEA, Nathan SIT, Jamie STARKS, Christopher STREIB, Robert TAYLOR, Wondwossen TEKLE, Huseyin TORE, Haralabos ZACHARATOS |
|                                        | Study Coordinator(s)                                                 | Audrey HENDRICKSON, Kathleen MILLER, Mindy RUMBOLZ, Julie SCHERBER, Abbey STAUGAITIS                                                                                                                                                                                                                                                                                                                                                                                                                                                                                                                                        |
| <b>University of Kentucky Hospital</b> | Principal Investigator<br>Co-Investigator(s)<br>Study Coordinator(s) | Roger HUMPHRIES<br>CRAIG CARTER, Sameer DESAI, Creed PETTIGREW<br>Joann SHORT                                                                                                                                                                                                                                                                                                                                                                                                                                                                                                                                               |
| <b>Henry Ford Hospital</b>             | Principal Investigators<br>Co-Investigator(s)                        | Hebah HEFZY, Andrew RUSSMAN<br>Christopher LEWANDOWSKI, Daniel MILLER, Joseph MILLER, Taher VOHRA                                                                                                                                                                                                                                                                                                                                                                                                                                                                                                                           |
|                                        | Study Coordinator(s)                                                 | Shannen BERRY, Anne Marie LUNDELL                                                                                                                                                                                                                                                                                                                                                                                                                                                                                                                                                                                           |
| <b>Abington Memorial Hospital</b>      | Principal Investigator<br>Co-Investigator(s)                         | Dan GZESH<br>Jill BAREN, James COOK, Brett CUCCHIARA, Franklin DIAMOND, Lee HARRIS, Karin KELLERMAN, John KHOURY, Brad KLEIN, Laurie KNEPPER, Osman KOZAK, Kandan KULANDAIVEL, Larami MACKENZIE, Jennifer MCGOWAN, TRAINER, Qaisar SHAH, David WEISMAN                                                                                                                                                                                                                                                                                                                                                                      |
| <b>WellSpan York</b>                   | Principal Investigator                                               | Erik KOCHERT                                                                                                                                                                                                                                                                                                                                                                                                                                                                                                                                                                                                                |

|                 |                      |                                                                                                                                                                                                                                                                                                                                                                                 |
|-----------------|----------------------|---------------------------------------------------------------------------------------------------------------------------------------------------------------------------------------------------------------------------------------------------------------------------------------------------------------------------------------------------------------------------------|
| <b>Hospital</b> | Co-Investigator(s)   | Jill BAREN, Brent BECKER, Ronald BENENSON, Kalpesh BHUVA, Mark COLLIN, Brett CUCCHIARA, William FIELDS, Mark GONZALES, Jeremy HUTCHINS, Eric KLOTZ, Justin KOCH, David LEE, John MINGLE, Nicholas PAPPAS, Marc POLLACK, Kim POPE, Teri REBERT, Robert REIF, Nels ROSE, Eric SANDERS, Lisa SMALE, Matthew STEPHENS, Robert STERLING, Robert STUNTZ, Colleen TRAN, Guy YOUNGBLOOD |
|                 | Study Coordinator(s) | Barbie STAHLMAN                                                                                                                                                                                                                                                                                                                                                                 |

| Site                                             | Role                    | Team Member                                                                                                                                                                                                                                                                                 |
|--------------------------------------------------|-------------------------|---------------------------------------------------------------------------------------------------------------------------------------------------------------------------------------------------------------------------------------------------------------------------------------------|
| Abbott Northwestern Hospital                     | Principal Investigator  | Mark YOUNG                                                                                                                                                                                                                                                                                  |
|                                                  | Co-Investigator(s)      | Michelle BIROS, Mustapha EZZEDDINE, Pezhman ROOHANI, Holly SWANSON-CARROLL, Ronald TARREL                                                                                                                                                                                                   |
|                                                  | Study Coordinator(s)    | Jennifer FEASE, Sarah HOCHSPRUNG                                                                                                                                                                                                                                                            |
| Aria Health Frankford Campus                     | Principal Investigators | Nina GENTILE, Joshua SIMON, Gerald WYDRO                                                                                                                                                                                                                                                    |
|                                                  | Co-Investigator(s)      | Pamela GOLDMAN, Mercedes JACOBSON                                                                                                                                                                                                                                                           |
|                                                  | Study Coordinator(s)    | Hannah REIMER                                                                                                                                                                                                                                                                               |
| Aurora St. Luke's Medical Center                 | Principal Investigators | Arvind AHUJA, Khaled ASI, Elizabeth MARRIOTT, Rehan SAJJAD                                                                                                                                                                                                                                  |
|                                                  | Co-Investigator(s)      | Tom AUFDERHEIDE, Akram SHHADEH                                                                                                                                                                                                                                                              |
|                                                  | Study Coordinator(s)    | Carol HALLIDAY, Tonya HOLLRITH, Marilyn MILLER, Lynda YANNY                                                                                                                                                                                                                                 |
| Baltimore Washington Medical Center              | Principal Investigator  | Sangjin OH                                                                                                                                                                                                                                                                                  |
|                                                  | Co-Investigator(s)      | Carolyn CRONIN, Barney STERN                                                                                                                                                                                                                                                                |
|                                                  | Study Coordinator(s)    | Virginia GANLEY, Jill HECKENDORF                                                                                                                                                                                                                                                            |
| Banner Good Samaritan Medical Center             | Principal Investigator  | Jeremy PAYNE                                                                                                                                                                                                                                                                                |
|                                                  | Co-Investigator(s)      | Douglas FRANZ, Paola LINYARD, Emily RAY, Aleksander TKACH                                                                                                                                                                                                                                   |
|                                                  | Study Coordinator(s)    | Tony DENISON                                                                                                                                                                                                                                                                                |
| Banner University Medical Center - South Campus  | Principal Investigator  | Kendra DRAKE                                                                                                                                                                                                                                                                                |
|                                                  | Co-Investigator(s)      | Katherine BONSELL, Kurt DENNINGHOFF, Chelsea KIDWELL, David NGUYEN, Jennifer TAY                                                                                                                                                                                                            |
|                                                  | Study Coordinator(s)    | Isabelle CHEA, Kathryn SCHIERLING                                                                                                                                                                                                                                                           |
| Banner University Medical Center - Tucson Campus | Principal Investigators | Kendra DRAKE, Farshad SHIRAZI                                                                                                                                                                                                                                                               |
|                                                  | Co-Investigator(s)      | Katherine BONSELL, Kurt DENNINGHOFF, Chelsea KIDWELL, David NGUYEN, Jennifer TAY                                                                                                                                                                                                            |
|                                                  | Study Coordinator(s)    | Bruce BARNHART, Isabelle CHEA, Karen LUTRICK, Kathryn SCHIERLING                                                                                                                                                                                                                            |
| Barnes Jewish Hospital                           | Principal Investigators | Laura HEITSCH, Pete PANAGOS                                                                                                                                                                                                                                                                 |
|                                                  | Co-Investigator(s)      | Opeolu ADEOYE, Alla AL-HABIB, Hesham ALLAM, Vamshi BALASETTI, Christian BURRELL, David CARPENTER, David CURFMAN, Christopher DELINE, Colin DERDEYN, Javon EDGECOMBE, Andria FORD, Derek HOLDER, Naim KHOURY, Tobias KULIK, Gyan KUMAR, Jin-Moo LEE, Christopher LEON-GUERRERO, Art PANCIOLI |
|                                                  | Study Coordinator(s)    | Jill NEWGENT                                                                                                                                                                                                                                                                                |

|                                                                     |                         |                                                                                                                                                                                                                                                                                                                                                                                                                                                                                                                                                                                                                                                   |
|---------------------------------------------------------------------|-------------------------|---------------------------------------------------------------------------------------------------------------------------------------------------------------------------------------------------------------------------------------------------------------------------------------------------------------------------------------------------------------------------------------------------------------------------------------------------------------------------------------------------------------------------------------------------------------------------------------------------------------------------------------------------|
| Ben Taub General Hospital                                           | Principal Investigators | Dick KUO, Paulina SERGOT                                                                                                                                                                                                                                                                                                                                                                                                                                                                                                                                                                                                                          |
|                                                                     | Co-Investigator(s)      | Haitham HUSSEIN, Elizabeth JONES, Joseph KASS                                                                                                                                                                                                                                                                                                                                                                                                                                                                                                                                                                                                     |
|                                                                     | Study Coordinator(s)    | Kelly KEENE                                                                                                                                                                                                                                                                                                                                                                                                                                                                                                                                                                                                                                       |
| Beth Israel Deaconess Medical Center                                | Principal Investigator  | Nathan SHAPIRO                                                                                                                                                                                                                                                                                                                                                                                                                                                                                                                                                                                                                                    |
|                                                                     | Co-Investigator(s)      | Leslie BILELLO, Jeremy CAREY, Jonathan EDLOW, Lester LEUNG, Vasileios-Arsenios LIOUTAS, Mark MCALLISTER, Magdy SELIM, Edward ULLMAN                                                                                                                                                                                                                                                                                                                                                                                                                                                                                                               |
|                                                                     | Study Coordinator(s)    | Sharon HAYES, James WAREING                                                                                                                                                                                                                                                                                                                                                                                                                                                                                                                                                                                                                       |
| Bethesda North Hospital                                             | Principal Investigators | Rahul KARAMCHANDANI, Kyle WALSH                                                                                                                                                                                                                                                                                                                                                                                                                                                                                                                                                                                                                   |
|                                                                     | Co-Investigator(s)      | Opeolu ADEOYE, Jordan BONOMO, Joseph BRODERICK, Rhonda CADENA, Elisheva COLEMAN, Felipe DE LOS RIOS LA ROSA, Stacie DEMEL, Bryan ECKERLE, Simona FERIOLI, Matthew FLAHERTY, Rachel GARVIN, Anna GENSIC, Sabreena GILLOW, Aaron GROSSMAN, Jonah GROSSMAN, Laura HEITSCH, Adam JASNE, Daniel KANTER, Brian KATZ, Pooja KHATRI, Brett KISSELA, Dawn KLEINDORFER, William KNIGHT, Natalie KREITZER, Julian MACEDO, Jason MACKEY, Sharyl MARTINI, Erin MCDONOUGH, Eva MISTRY, Meena MUNSHI, Brian OLOIZIA, Art PANCIOLI, Katrina PEARISO, Jonathan RATCLIFF, Sameer SHARMA, Blake SMITH, Michael STAR, Brian STETTLER, Daniel WOO, Muhammad ZAGHLOULEH |
|                                                                     | Study Coordinator(s)    | Shannon DEEDS, Sara KEEGAN                                                                                                                                                                                                                                                                                                                                                                                                                                                                                                                                                                                                                        |
| Brigham and Women's Hospital                                        | Principal Investigator  | Daniel PALLIN                                                                                                                                                                                                                                                                                                                                                                                                                                                                                                                                                                                                                                     |
|                                                                     | Co-Investigator(s)      | Imoigele AISIKU, Edilberto AMORIM, Philip ANDERSON, Khamid BAKHADIROV, Matthew BEVERS, Calvin BROWN, Xuemei CAI, David CHUNG, Ming-Cheih DING, Brian EDLOW, Guido FALCONE, Sarah FRASURE, Scott GOLDBERG, Eric GORALNICK, Peter HOU, Saef IZZY, Guruprasad JAMBAULIKAR, Ruchira JHA, Minjee KIM, Joshua KOSOWSKY, Ariane LEWIS, Sanjay MENON, Sarah NELSON, Ziad OBERMEYER, Kelli O'LAUGHLIN, Casey OLM-SHIPMAN, Kei OUCHI, Siddharth PARMAR, Nils PETERSEN, Chia-Ling PHUAH, Charles POZNER, Ali RAZMARA, Jeremiah SCHUUR, Raghu SEETHALA, Shreyansh SHAH, Sarah WAHLSTER, Scott WEINER, Sahar ZAFAR, Eli ZIMMERMAN                              |
|                                                                     | Study Coordinator(s)    | Rachel CATLIN, Rebecca GISH, Emily JAMIESON, Conor NAROVEC                                                                                                                                                                                                                                                                                                                                                                                                                                                                                                                                                                                        |
| California Pacific Medical Center Davies Campus                     | Principal Investigator  | Nobl BARAZANGI                                                                                                                                                                                                                                                                                                                                                                                                                                                                                                                                                                                                                                    |
|                                                                     | Co-Investigator(s)      | Ermias AYTENFISU, Ann BEDENK, Charlene CHEN, Shirley CHEN, Billy GAO, Victor JARAMILLO, Elena PODOLSKAYA, Jessica REDFORD, Jack ROSE, Oana SPATARU, David TONG, Christine WONG                                                                                                                                                                                                                                                                                                                                                                                                                                                                    |
|                                                                     | Study Coordinator(s)    | Katie PONTING                                                                                                                                                                                                                                                                                                                                                                                                                                                                                                                                                                                                                                     |
| California Pacific Medical Center Pacific Campus, San Francisco, CA | Principal Investigator  | Nobl BARAZANGI                                                                                                                                                                                                                                                                                                                                                                                                                                                                                                                                                                                                                                    |
|                                                                     | Co-Investigator(s)      | Ermias AYTENFISU, Ann BEDENK, Charlene CHEN, Shirley CHEN, Billy GAO, Victor JARAMILLO, Elena PODOLSKAYA, Jessica REDFORD, Jack ROSE, Oana SPATARU, David TONG, Christine WONG                                                                                                                                                                                                                                                                                                                                                                                                                                                                    |

|                                  |                         |                                                                                                                                                                                                                                                                                                                                                                                                                                                                                                                                                                                           |
|----------------------------------|-------------------------|-------------------------------------------------------------------------------------------------------------------------------------------------------------------------------------------------------------------------------------------------------------------------------------------------------------------------------------------------------------------------------------------------------------------------------------------------------------------------------------------------------------------------------------------------------------------------------------------|
|                                  | Study Coordinator(s)    | Katie PONTING                                                                                                                                                                                                                                                                                                                                                                                                                                                                                                                                                                             |
| Chandler Regional Medical Center | Principal Investigator  | Brian TIFFANY                                                                                                                                                                                                                                                                                                                                                                                                                                                                                                                                                                             |
|                                  | Co-Investigator(s)      | Hemant PANDEY, Euly SMITH                                                                                                                                                                                                                                                                                                                                                                                                                                                                                                                                                                 |
|                                  | Study Coordinator(s)    | Annette RUIZ TAYLOR                                                                                                                                                                                                                                                                                                                                                                                                                                                                                                                                                                       |
| Christ Hospital                  | Principal Investigators | Rahul KARAMCHANDANI, Kyle WALSH                                                                                                                                                                                                                                                                                                                                                                                                                                                                                                                                                           |
|                                  | Co-Investigator(s)      | Opeolu ADEOYE, Jordan BONOMO, Joseph BRODERICK, Elisheva COLEMAN, Felipe DE LOS RIOS LA ROSA, Stacie DEMEL, Bryan ECKERLE, Simona FERIOLI, Matthew FLAHERTY, Rachel GARVIN, Anna GENSIC, Sabreena GILLOW, Aaron GROSSMAN, Jonah GROSSMAN, Adam JASNE, Daniel KANTER, Brian KATZ, Pooja KHATRI, Brett KISSELA, Dawn KLEINDORFER, William KNIGHT, Natalie KREITZER, Julian MACEDO, Sharyl MARTINI, Erin MCDONOUGH, Meena MUNSHI, Brian OLOIZIA, Art PANCIOLI, Katrina PEARISO, Jonathan RATCLIFF, Sameer SHARMA, Blake SMITH, Michael STAR, Brian STETTLER, Daniel WOO, Muhammad ZAGHLOULEH |
|                                  | Study Coordinator(s)    | Shannon DEEDS, Sara KEEGAN                                                                                                                                                                                                                                                                                                                                                                                                                                                                                                                                                                |
| Christiana Hospital              | Principal Investigator  | Jason NOMURA                                                                                                                                                                                                                                                                                                                                                                                                                                                                                                                                                                              |
|                                  | Co-Investigator(s)      | Mary CIECHANOWSKI, Christian COLETTI, Valerie DECHANT, Kimberly GANNON, Jonathan MCGHEE, Anthony MUNSON, Jason NACE, John POWELL, Jonathan RASER-SCHRAMM, Waimei Amy TAI, Eli ZESERSON                                                                                                                                                                                                                                                                                                                                                                                                    |
|                                  | Study Coordinator(s)    | Amy CHERICO, Cynthia HOON                                                                                                                                                                                                                                                                                                                                                                                                                                                                                                                                                                 |
| Columbia St. Mary's Hospital     | Principal Investigator  | Tom AUFDERHEIDE                                                                                                                                                                                                                                                                                                                                                                                                                                                                                                                                                                           |
|                                  | Co-Investigator(s)      | Michael CONNOR, Marc LAZZARO, John LYNCH                                                                                                                                                                                                                                                                                                                                                                                                                                                                                                                                                  |
|                                  | Study Coordinator(s)    | Amanda EMMRICH, Melissa MENA                                                                                                                                                                                                                                                                                                                                                                                                                                                                                                                                                              |
| Cooper University Hospital       | Principal Investigator  | Thomas MIRSEN                                                                                                                                                                                                                                                                                                                                                                                                                                                                                                                                                                             |
|                                  | Co-Investigator(s)      | Jill BAREN, Brigitte BAUMANN, Ankur BHARGAVA, Jia Zhen CHENG, Brett CUCCHIARA, Michael GALLAGHER, Xuan-Lan GRIFFITH, Christopher JONES, Bhavika KAKADIA, Tapan KAVI, Vladimir KLINOV, Mia KO, Dena LITTLE, Neil MASANGKAY, Eric NAGELE, Rajiv NARULA, James NOTO, Alok PATEL, Ruchir SHAH, Umang SHAH, George SHOKRI, Randip TANEJA, Ephrem TEKLEMARIAM, Ryna THEN, Michael WESTON, Furkan YILMAZ                                                                                                                                                                                         |
|                                  | Study Coordinator(s)    | Christine BESWICK, Lisa CAPANO-WEHRLE, Cory HACKMYER, Tamara LEE, Andrew MARCH, Patricia NIBLACK                                                                                                                                                                                                                                                                                                                                                                                                                                                                                          |
| Dell Seton Medical Center at UT  | Principal Investigator  | Truman MILLING                                                                                                                                                                                                                                                                                                                                                                                                                                                                                                                                                                            |
|                                  | Study Coordinator(s)    | Laura LACHANCE                                                                                                                                                                                                                                                                                                                                                                                                                                                                                                                                                                            |
| El Camino Hospital               | Principal Investigator  | Peter FUNG                                                                                                                                                                                                                                                                                                                                                                                                                                                                                                                                                                                |
|                                  | Study Coordinator(s)    | Inderjit DHOKAL, Rebecca DUNN, Christine KELLER, Ryan SMITH                                                                                                                                                                                                                                                                                                                                                                                                                                                                                                                               |
| Emory University                 | Principal Investigator  | Michael ROSS                                                                                                                                                                                                                                                                                                                                                                                                                                                                                                                                                                              |

|                                           |                         |                                                                                                                                                                                                                                                                                                                                                                                                                                                                                             |
|-------------------------------------------|-------------------------|---------------------------------------------------------------------------------------------------------------------------------------------------------------------------------------------------------------------------------------------------------------------------------------------------------------------------------------------------------------------------------------------------------------------------------------------------------------------------------------------|
| Hospital                                  | Co-Investigator(s)      | Aaron ANDERSON, Anika BACKSTER, Samir BELAGAJE, Elizabeth CARROLL, Robin DHARIA, Adam EDWARDS, Tamara ESPINOZA, Michael FRANKEL, Minas GEBRU, Rishi GUPTA, Vijayakumar JAVALKAR, Omar KASS-HOUT, Tareq KASS-HOUT, Carlene KINGSTON, Andrey LIMA, Lisa MERCK, Fadi NAHAB, Raul NOGUEIRA, Mahmoud OBIDEEN, Anwar OSBORNE, Kumiko OWADA, Shelly OZARK, Vishal PATEL, Harrison PEARL, Haseeb RAHMAN, Jonathan RATCLIFF, Ali SAAD, Yasir SALEEM, Aaron STAYMAN, Melanie WINNINGHAM, David WRIGHT |
|                                           | Study Coordinator(s)    | Alex HALL, Nick STANLEY                                                                                                                                                                                                                                                                                                                                                                                                                                                                     |
| Emory University Hospital Midtown         | Principal Investigator  | Michael ROSS                                                                                                                                                                                                                                                                                                                                                                                                                                                                                |
|                                           | Co-Investigator(s)      | Aaron ANDERSON, Anika BACKSTER, Samir BELAGAJE, Robin DHARIA, Adam EDWARDS, Tamara ESPINOZA, Michael FRANKEL, Minas GEBRU, Rishi GUPTA, Vijayakumar JAVALKAR, Omar KASS-HOUT, Tareq KASS-HOUT, Andrey LIMA, Fadi NAHAB, Raul NOGUEIRA, Mahmoud OBIDEEN, Anwar OSBORNE, Kumiko OWADA, Vishal PATEL, Jonathan RATCLIFF, Ali SAAD, Aaron STAYMAN, Melanie WINNINGHAM, David WRIGHT                                                                                                             |
|                                           | Study Coordinator(s)    | Alex HALL, Nick STANLEY                                                                                                                                                                                                                                                                                                                                                                                                                                                                     |
| Essentia Health St. Mary's Medical Center | Principal Investigator  | Dimitrios GIANNAKIDIS                                                                                                                                                                                                                                                                                                                                                                                                                                                                       |
|                                           | Co-Investigator(s)      | Linda ANDERSON, Nick ITZIN, Diane ROACH, Ruth THOMSON, Gail WALLACE                                                                                                                                                                                                                                                                                                                                                                                                                         |
|                                           | Study Coordinator(s)    | Erica CHOPSKIE, Karen HARMON, Robert SHULTZ                                                                                                                                                                                                                                                                                                                                                                                                                                                 |
| Essentia Health-Fargo                     | Principal Investigator  | M. Ziad DARKHABANI                                                                                                                                                                                                                                                                                                                                                                                                                                                                          |
|                                           | Co-Investigator(s)      | Michelle BIROS, Jessica SIMS                                                                                                                                                                                                                                                                                                                                                                                                                                                                |
|                                           | Study Coordinator(s)    | Mandy BARTLETT, Marlee HURTT                                                                                                                                                                                                                                                                                                                                                                                                                                                                |
| Fairview Southdale Hospital               | Principal Investigator  | Mustapha EZZEDDINE                                                                                                                                                                                                                                                                                                                                                                                                                                                                          |
|                                           | Co-Investigator(s)      | Michelle BIROS, David GRESBACK, Alexander ZUBKOV                                                                                                                                                                                                                                                                                                                                                                                                                                            |
|                                           | Study Coordinator(s)    | Audrey HENDRICKSON, Kathleen MILLER, Mindy RUMBOLZ, Julie SCHERBER, Abbey STAUGAITIS                                                                                                                                                                                                                                                                                                                                                                                                        |
| Frederick Memorial Hospital               | Principal Investigator  | Shahid RAFIQ                                                                                                                                                                                                                                                                                                                                                                                                                                                                                |
|                                           | Study Coordinator(s)    | Tom SHUPP                                                                                                                                                                                                                                                                                                                                                                                                                                                                                   |
| George Washington University Hospital     | Principal Investigator  | Kathleen BURGER                                                                                                                                                                                                                                                                                                                                                                                                                                                                             |
|                                           | Co-Investigator(s)      | Richard BENSON, Christopher LEON-GUERRERO, Andrew MELTZER, Zurab NADAREISHVILLI, Diane SAUTER                                                                                                                                                                                                                                                                                                                                                                                               |
|                                           | Study Coordinator(s)    | Radwa ALY, Angela KELLY                                                                                                                                                                                                                                                                                                                                                                                                                                                                     |
| Good Samaritan                            | Principal Investigators | Rahul KARAMCHANDANI, Kyle WALSH                                                                                                                                                                                                                                                                                                                                                                                                                                                             |



|                                              |                         |                                                                                                                                                                                                                                                                                                                                                                                                                                                                                                                                                                                                                                       |
|----------------------------------------------|-------------------------|---------------------------------------------------------------------------------------------------------------------------------------------------------------------------------------------------------------------------------------------------------------------------------------------------------------------------------------------------------------------------------------------------------------------------------------------------------------------------------------------------------------------------------------------------------------------------------------------------------------------------------------|
| Hospital<br>(Cincinnati, OH)                 | Co-Investigator(s)      | Opeolu ADEOYE, Jordan BONOMO, Joseph BRODERICK, Rhonda CADENA, Elisheva COLEMAN, Felipe DE LOS RIOS LA ROSA, Stacie DEMEL, Bryan ECKERLE, Simona FERIOLI, Matthew FLAHERTY, Rachel GARVIN, Anna GENSIC, Sabreena GILLOW, Aaron GROSSMAN, Jonah GROSSMAN, Laura HEITSCH, Adam JASNE, Daniel KANTER, Brian KATZ, Pooja KHATRI, Brett KISSELA, Dawn KLEINDORFER, William KNIGHT, Natalie KREITZER, Julian MACEDO, Jason MACKEY, Sharyl MARTINI, Erin MCDONOUGH, Meena MUNSHI, Brian OLOIZIA, Art PANCIOLI, Katrina PEARISO, Jonathan RATCLIFF, Sameer SHARMA, Blake SMITH, Michael STAR, Brian STETTLER, Daniel WOO, Muhammad ZAGHLOULEH |
|                                              | Study Coordinator(s)    | Shannon DEEDS, Sara KEEGAN                                                                                                                                                                                                                                                                                                                                                                                                                                                                                                                                                                                                            |
| Good Samaritan<br>Hospital (San Jose,<br>CA) | Principal Investigator  | Harmeet SACHDEV                                                                                                                                                                                                                                                                                                                                                                                                                                                                                                                                                                                                                       |
|                                              | Co-Investigator(s)      | James QUINN                                                                                                                                                                                                                                                                                                                                                                                                                                                                                                                                                                                                                           |
|                                              | Study Coordinator(s)    | Christine KELLER                                                                                                                                                                                                                                                                                                                                                                                                                                                                                                                                                                                                                      |
| Hackensack<br>University Medical<br>Center   | Principal Investigator  | Chinwe OGEDEGBE                                                                                                                                                                                                                                                                                                                                                                                                                                                                                                                                                                                                                       |
|                                              | Co-Investigator(s)      | Subasini DASH, Nina GENTILE                                                                                                                                                                                                                                                                                                                                                                                                                                                                                                                                                                                                           |
|                                              | Study Coordinator(s)    | Diana MCCARTHY, Arelis VILLOT-SANTIAGO                                                                                                                                                                                                                                                                                                                                                                                                                                                                                                                                                                                                |
| Hahnemann<br>University<br>Hospital          | Principal Investigators | Ralph RIVIELLO, Mark SAKS                                                                                                                                                                                                                                                                                                                                                                                                                                                                                                                                                                                                             |
|                                              | Co-Investigator(s)      | Theodore CORBIN, Nina GENTILE, Sharon GRISWOLD-<br>THEODORSON, Todd MCGRATH, Daniel MULLIN, Edward<br>RAMOSKA, Eric STANDER, David TABBY                                                                                                                                                                                                                                                                                                                                                                                                                                                                                              |
|                                              | Study Coordinator(s)    | Lisa BONACQUISTI, Anne JOHNSON, John MASSEY, Patricia<br>MCNELIS, Romy NOCERA                                                                                                                                                                                                                                                                                                                                                                                                                                                                                                                                                         |
| Harper University<br>Hospital                | Principal Investigators | Anthony LAGINA, Claire PEARSON                                                                                                                                                                                                                                                                                                                                                                                                                                                                                                                                                                                                        |
|                                              | Co-Investigator(s)      | Benjamin ATKINSON, Pratik BHATTACHARYA, Seemant<br>CHATURVEDI, Angela GROVES, Amit KANSARA, Phillip LEVY,<br>Ramesh MADHAVAN, Aniel MAJJHOO, Wazim MOHAMED,<br>Meenakshi MUNSHI, Greg NORRIS, Brian O'NEIL, Kumar<br>RAJAMANI, Sunitha SANTHAKUMAR, Robert SHERWIN, Kushak<br>SUCHDEV, Ambooj TIWARI, Preet VARADE, Robert WELCH                                                                                                                                                                                                                                                                                                      |
|                                              | Study Coordinator(s)    | Farhan AYAZ, Saikat BHUIYAN, Valerie MIKA                                                                                                                                                                                                                                                                                                                                                                                                                                                                                                                                                                                             |
| Henry Ford West<br>Bloomfield<br>Hospital    | Principal Investigators | Hebah HEFZY, Andrew RUSSMAN                                                                                                                                                                                                                                                                                                                                                                                                                                                                                                                                                                                                           |
|                                              | Co-Investigator(s)      | Christopher LEWANDOWSKI, Daniel MILLER, Joseph MILLER,<br>Taher VOHRA                                                                                                                                                                                                                                                                                                                                                                                                                                                                                                                                                                 |
|                                              | Study Coordinator(s)    | Shannen BERRY, Anne Marie LUNDELL                                                                                                                                                                                                                                                                                                                                                                                                                                                                                                                                                                                                     |
| Huntington<br>Memorial Hospital              | Principal Investigator  | Arbi OHANIAN                                                                                                                                                                                                                                                                                                                                                                                                                                                                                                                                                                                                                          |
|                                              | Co-Investigator(s)      | Candy CORRAL, Robert GOLDWEBER, Conrad LIANG, Artin<br>MINAEIAN, Sharon YEGIAIAN                                                                                                                                                                                                                                                                                                                                                                                                                                                                                                                                                      |
|                                              | Study Coordinator(s)    | Marilyn PEREZ                                                                                                                                                                                                                                                                                                                                                                                                                                                                                                                                                                                                                         |
| Jeanes Hospital                              | Principal Investigator  | Marcia HALPERN                                                                                                                                                                                                                                                                                                                                                                                                                                                                                                                                                                                                                        |
|                                              | Co-Investigator(s)      | Nina GENTILE                                                                                                                                                                                                                                                                                                                                                                                                                                                                                                                                                                                                                          |
|                                              | Study Coordinator(s)    | Maryellen NELSON                                                                                                                                                                                                                                                                                                                                                                                                                                                                                                                                                                                                                      |
| Johns Hopkins                                | Principal Investigator  | Victor URRUTIA                                                                                                                                                                                                                                                                                                                                                                                                                                                                                                                                                                                                                        |

|                                          |                         |                                                                                                                                                                                                                                                                  |
|------------------------------------------|-------------------------|------------------------------------------------------------------------------------------------------------------------------------------------------------------------------------------------------------------------------------------------------------------|
| Hospital                                 | Co-Investigator(s)      | Martinson ARNAN, Mona BAHOUTH, Mario CERDAN-TREVINO, Arjun CHANMUGAN, Yolanda CHIK, Jennifer DEARBORN, Romanus Roland FAIGLE, Ryan FELLING, Peter HILL, Shyian JEN, Richard LEIGH, Rafarl LINAS, Elisabeth MARSH, Bogachan SAHIN, Robert WITYK, Steven ZEILER    |
|                                          | Study Coordinator(s)    | Susan RICE, Jennifer RONALD                                                                                                                                                                                                                                      |
| Kings County Hospital Center             | Principal Investigators | Pia CHATTERJEE, Susan LAW, Steven LEVINE, Richard SINERT                                                                                                                                                                                                         |
|                                          | Co-Investigator(s)      | Anika BACKSTER, Clotilde BALUCANI, Ethan BRANDLER, Qing HAO, Ashika JAIN, Yongwoo KIM, Adrian MARCHIDANN, Jennifer MARTINDALE, Jay MELTON, Lorenzo PALADINO, Diana ROJAS-SOTO, Artem SUNIK, Benedict TAN, Helen VALSAMIS, Volodymyr VULKANOV, Shahriar ZEHTABCHI |
|                                          | Study Coordinator(s)    | Vanessa ARNEDO, Marijayne BUSHEY, Nadege GILLES, Saroj KUNNAKKAT, Catherine LUSHBOUGH, Schweta MALHOTRA, Shreya PANDYA, Bryce PETTY, Bruhati SHAH, Jonathan SINGER                                                                                               |
| Legacy Emanuel Medical Center            | Principal Investigator  | Helmi LUTSEP                                                                                                                                                                                                                                                     |
|                                          | Co-Investigator(s)      | Wayne CLARK, Alexandra DIMITROVA, Elizabeth NORTH                                                                                                                                                                                                                |
|                                          | Study Coordinator(s)    | Kelly FEEST, Jonathan FOLEY                                                                                                                                                                                                                                      |
| Lincoln Medical and Mental Health Center | Principal Investigator  | Shekar MURTHY                                                                                                                                                                                                                                                    |
|                                          | Co-Investigator(s)      | Madan Mohan Reddy ARUGUNTA, Hussein ASSALLUM, Balavenkatesh KANNA, James ZISFEIN                                                                                                                                                                                 |
|                                          | Study Coordinator(s)    | Jessica MONTALVO                                                                                                                                                                                                                                                 |
| Long Beach Memorial Medical Center       | Principal Investigator  | Nima RAMEZAN-ARAB                                                                                                                                                                                                                                                |
|                                          | Co-Investigator(s)      | Omid OMIDVAR, Nirav S. PATEL, Michael L. THOMPSON                                                                                                                                                                                                                |
|                                          | Study Coordinator(s)    | Roxana FLORES, Dena HOPKINS, Françoise TOUSSAINT-JONES, Angie WEST                                                                                                                                                                                               |
| Marquette General Hospital               | Principal Investigator  | Karl MEISEL                                                                                                                                                                                                                                                      |
|                                          | Study Coordinator(s)    | Jodi NEASE                                                                                                                                                                                                                                                       |
| Massachusetts                            | Principal Investigators | Ferdinando BUONANNO, Scott SILVERMAN                                                                                                                                                                                                                             |

|                                                          |                        |                                                                                                                                                                                                                                                                                                                                                                                                                                                                                                                                                                                                                                                                                                                                                                                                                                                                                                                                                                                                                                                         |
|----------------------------------------------------------|------------------------|---------------------------------------------------------------------------------------------------------------------------------------------------------------------------------------------------------------------------------------------------------------------------------------------------------------------------------------------------------------------------------------------------------------------------------------------------------------------------------------------------------------------------------------------------------------------------------------------------------------------------------------------------------------------------------------------------------------------------------------------------------------------------------------------------------------------------------------------------------------------------------------------------------------------------------------------------------------------------------------------------------------------------------------------------------|
| General Hospital                                         | Co-Investigator(s)     | Edilberto AMORIM, Christopher ANDERSON, Khamid BAKHADIROV, Ribal BASSIL, Ayush BATRA, Matthew BEVERS, Gregoire BOULOUIS, Xuemei CAI, Andreas CHARIDIMOU, David CHUNG, Ming-Cheih DING, Brian EDLOW, Mark ETHERTON, Guido FALCONE, Ananda FINE, Rajan GADHIA, Anne-Katrin GIESE, Joshua GOLDSTEIN, Andrea HARRIOTT, Leigh HOCHBERG, Saef IZZY, Sameen JAFARI, Ruchira JHA, Abbas KHARAL, Ayaz KHAWAJA, Jennifer KIM, Minjee KIM, William Taylor KIMBERLY, Arne LAUER, David LERNER, Ariane LEWIS, David LIN, Sandro MARINI, Sanjay MENON, Christina MIJALSKI, Andrea MOROTTI, Sarah NELSON, MingMing NING, Casey OLM-SHIPMAN, Charlene ONG, Fadar OTITE, Marco PASI, Nils PETERSEN, Chia-Ling PHUAH, Pedro PINTO, Sergi RAMIREZ MARTINEZ, Shyam RAO, Ali RAZMARA, Jonathan ROSAND, Natalia ROST, Daniel RUBIN, Frieder SCHLUNK, Lee SCHWAMM, Shreyansh SHAH, Richa SHARMA, Starane SHEPHERD, Faheem SHERIFF, Matthew SIKET, Aneesh SINGHAL, Zachary THRELKELD, Anand ENKATRAMAN, Anand VISWANATHAN, Sarah WAHLSTER, Li XIONG, Sahar ZAFAR, Eli ZIMMERMAN |
|                                                          | Study Coordinator(s)   | Lauren BARTON, Ryan CALLAHAN, Kathleen FEENEY, Melissa HOWELL, Eric LOESCH, Blair Alden PARRY, Eric RIKLIN, Chun Mei SU, Gregory TIRRELL                                                                                                                                                                                                                                                                                                                                                                                                                                                                                                                                                                                                                                                                                                                                                                                                                                                                                                                |
| Mayo Clinic Saint Marys Campus                           | Principal Investigator | Fernanda BELLOLIO                                                                                                                                                                                                                                                                                                                                                                                                                                                                                                                                                                                                                                                                                                                                                                                                                                                                                                                                                                                                                                       |
|                                                          | Co-Investigator(s)     | Michelle BIROS, Jennifer FUGATE, Waqas GILANI, James KLAAS                                                                                                                                                                                                                                                                                                                                                                                                                                                                                                                                                                                                                                                                                                                                                                                                                                                                                                                                                                                              |
|                                                          | Study Coordinator(s)   | Renee CABALKA                                                                                                                                                                                                                                                                                                                                                                                                                                                                                                                                                                                                                                                                                                                                                                                                                                                                                                                                                                                                                                           |
| Medical University of South Carolina University Hospital | Principal Investigator | Christine HOLMSTEDT                                                                                                                                                                                                                                                                                                                                                                                                                                                                                                                                                                                                                                                                                                                                                                                                                                                                                                                                                                                                                                     |
|                                                          | Co-Investigator(s)     | Robert ADAMS, Opeolu ADEOYE, Charles ANDREWS, Chirantan BANERJEE, Julio CHALELA, Marc CHIMOWITZ, Wuwei FENG, Angela HAYS SHAPSHAK, Edward JAUCH, Shelly OZARK, Art PANCIOLI, Tanya TURAN, Ashley WABNITZ                                                                                                                                                                                                                                                                                                                                                                                                                                                                                                                                                                                                                                                                                                                                                                                                                                                |
|                                                          | Study Coordinator(s)   | Robert BURFEIND, Cheryl GRANT, Gina KELLER, Vicki STREETS                                                                                                                                                                                                                                                                                                                                                                                                                                                                                                                                                                                                                                                                                                                                                                                                                                                                                                                                                                                               |
| MedStar Washington Hospital Center                       | Principal Investigator | Munish GOYAL                                                                                                                                                                                                                                                                                                                                                                                                                                                                                                                                                                                                                                                                                                                                                                                                                                                                                                                                                                                                                                            |
|                                                          | Co-Investigator(s)     | Richard BENSON, Rahul BHAT, Amie HSIA, Lisa JACOBSON, Norine MCGRATH, Diane SAUTER                                                                                                                                                                                                                                                                                                                                                                                                                                                                                                                                                                                                                                                                                                                                                                                                                                                                                                                                                                      |
|                                                          | Study Coordinator(s)   | Theresa MORIARTY                                                                                                                                                                                                                                                                                                                                                                                                                                                                                                                                                                                                                                                                                                                                                                                                                                                                                                                                                                                                                                        |
| Memorial                                                 | Principal Investigator | Elizabeth JONES                                                                                                                                                                                                                                                                                                                                                                                                                                                                                                                                                                                                                                                                                                                                                                                                                                                                                                                                                                                                                                         |

|                                           |                         |                                                                                                                                                                                                                                                                                                                                                                                                                                                                                                                                                                                                                                                                                                                                                            |
|-------------------------------------------|-------------------------|------------------------------------------------------------------------------------------------------------------------------------------------------------------------------------------------------------------------------------------------------------------------------------------------------------------------------------------------------------------------------------------------------------------------------------------------------------------------------------------------------------------------------------------------------------------------------------------------------------------------------------------------------------------------------------------------------------------------------------------------------------|
| Hermann Texas Medical Center              | Co-Investigator(s)      | Arif AZAM, Carrie BAKUNAS, Andres BAYONA, Jonas BEYENE, Caroline BORGAN, Richard BRADLEY, Yashwant CHATHAMPALLY, Andrew COYNE, Daniel DE LOS SANTOS, Pratik DOSHI, Natalie ELLIOTT, Emily ENDACOTT, Lindley FOLKERSON, Christopher FREEMAN, Vanessa GARZAMIRANDA, Keith GATES, Kasey GILDERSLEEVE, Joshua GUINDON, Kassie HAITZ, Stephen HECHT, Kevin HOFFMAN, Quyen HUYNH, Romeo JOSEPH, Brent KING, James LEONI, Jason LESNICK, Rohith MALYA, Justin MAZZILLO, Omar METWALLI, Amy NOLAND, Michael PANDYA, Andrew POTTER, Eric REICHMAN, David ROBINSON, Michael ROKYTA, Carlos ROLDAN, Jason SATTERFIELD, Paulina SERGOT, Justin SHEPARD, Soa-Yih SHER, Ian SMITH, Jeffrey STOWELL, Salvatore VALENTI, Richard WITKOV Monica MENDOZA-MOORE, Misty OTTMAN |
|                                           | Study Coordinator(s)    |                                                                                                                                                                                                                                                                                                                                                                                                                                                                                                                                                                                                                                                                                                                                                            |
| Mercy Franciscan Hospital - Mount Airy    | Principal Investigator  | Dawn KLEINDORFER                                                                                                                                                                                                                                                                                                                                                                                                                                                                                                                                                                                                                                                                                                                                           |
|                                           | Co-Investigator(s)      | Opeolu ADEOYE, Jordan BONOMO, Joseph BRODERICK, Rhonda CADENA, Felipe DE LOS RIOS LA ROSA, Bryan ECKERLE, Simona FERIOLI, Matthew FLAHERTY, Rachel GARVIN, Anna GENSIC, Aaron GROSSMAN, Laura HEITSCH, Daniel KANTER, Pooja KHATRI, Brett KISSELA, William KNIGHT, Jason MACKEY, Sharyl MARTINI, Erin MCDONOUGH, Meena MUNSHI, Art PANCIOLI, Jonathan RATCLIFF, Blake SMITH, Brian STETTLER, Daniel WOO                                                                                                                                                                                                                                                                                                                                                    |
|                                           | Study Coordinator(s)    | Irene EWING                                                                                                                                                                                                                                                                                                                                                                                                                                                                                                                                                                                                                                                                                                                                                |
| Mercy Franciscan Hospital - Western Hills | Principal Investigator  | Dawn KLEINDORFER                                                                                                                                                                                                                                                                                                                                                                                                                                                                                                                                                                                                                                                                                                                                           |
|                                           | Co-Investigator(s)      | Opeolu ADEOYE, Jordan BONOMO, Joseph BRODERICK, Rhonda CADENA, Felipe DE LOS RIOS LA ROSA, Bryan ECKERLE, Simona FERIOLI, Matthew FLAHERTY, Rachel GARVIN, Anna GENSIC, Aaron GROSSMAN, Laura HEITSCH, Daniel KANTER, Pooja KHATRI, Brett KISSELA, William KNIGHT, Jason MACKEY, Sharyl MARTINI, Erin MCDONOUGH, Meena MUNSHI, Art PANCIOLI, Jonathan RATCLIFF, Blake SMITH, Brian STETTLER, Daniel WOO                                                                                                                                                                                                                                                                                                                                                    |
|                                           | Study Coordinator(s)    | Irene EWING                                                                                                                                                                                                                                                                                                                                                                                                                                                                                                                                                                                                                                                                                                                                                |
| Mercy General Hospital                    | Principal Investigators | Mohammad MAHMOOD, Lucian MAIDAN                                                                                                                                                                                                                                                                                                                                                                                                                                                                                                                                                                                                                                                                                                                            |
|                                           | Co-Investigator(s)      | Ryan ARMOUR, Asad CHAUDHARY, Edwin CRUZ, Michael-Karsten DENGEL, Ehsan HADI, Marc LENAERTS, Alex NEE, Reza PIRSAHELI, John SCHAFER, Alan SHATZEL, Peter SKAFF                                                                                                                                                                                                                                                                                                                                                                                                                                                                                                                                                                                              |
|                                           | Study Coordinator(s)    | Dawn DIORIO, Danielle HORNBUCKLE, Raveca PINTEA, Isabel REYES, Deidre WENTWORTH                                                                                                                                                                                                                                                                                                                                                                                                                                                                                                                                                                                                                                                                            |
| Mercy Health                              | Principal Investigators | Rahul KARAMCHANDANI, Kyle WALSH                                                                                                                                                                                                                                                                                                                                                                                                                                                                                                                                                                                                                                                                                                                            |

|                                          |                         |                                                                                                                                                                                                                                                                                                                                                                                                                                                                               |
|------------------------------------------|-------------------------|-------------------------------------------------------------------------------------------------------------------------------------------------------------------------------------------------------------------------------------------------------------------------------------------------------------------------------------------------------------------------------------------------------------------------------------------------------------------------------|
| West Hospital                            | Co-Investigator(s)      | Opeolu ADEOYE, Jordan BONOMO, Joseph BRODERICK, Elisheva COLEMAN, Stacie DEMEL, Bryan ECKERLE, Simona FERIOLI, Matthew FLAHERTY, Anna GENSIC, Sabreena GILLOW, Jonah GROSSMAN, Adam JASNE, Daniel KANTER, Brian KATZ, Pooja KHATRI, Brett KISSELA, Dawn KLEINDORFER, William KNIGHT, Natalie KREITZER, Julian MACEDO, Erin MCDONOUGH, Brian OLOIZIA, Art PANCIOLI, Katrina PEARISO, Sameer SHARMA, Blake SMITH, Michael STAR, Brian STETTLER, Daniel WOO, Muhammad ZAGHLOULEH |
|                                          | Study Coordinator(s)    | Shannon DEEDS, Sara KEEGAN                                                                                                                                                                                                                                                                                                                                                                                                                                                    |
| Mercy San Juan Medical Center            | Principal Investigator  | Lucian MAIDAN                                                                                                                                                                                                                                                                                                                                                                                                                                                                 |
|                                          | Co-Investigator(s)      | Ryan ARMOUR, Asad CHAUDHARY, Edwin CRUZ, Michael-Karsten DENGEL, Ehsan HADI, Alex NEE, Reza PIRSAHELI, John SCHAFFER, Alan SHATZEL, Peter SKAFF                                                                                                                                                                                                                                                                                                                               |
|                                          | Study Coordinator(s)    | Dawn DIORIO, Danielle HORNBUCKLE, Raveca PINTEA, Isabel REYES                                                                                                                                                                                                                                                                                                                                                                                                                 |
| Mills Peninsula Medical Center           | Principal Investigator  | Mike KOHN                                                                                                                                                                                                                                                                                                                                                                                                                                                                     |
|                                          | Co-Investigator(s)      | Howard BELFER, Michael COHEN, Michael SIEGEL, Robert TELFER                                                                                                                                                                                                                                                                                                                                                                                                                   |
|                                          | Study Coordinator(s)    | Anke HEBIG                                                                                                                                                                                                                                                                                                                                                                                                                                                                    |
| New York-Presbyterian Brooklyn Methodist | Principal Investigator  | Robert BIRKHANN                                                                                                                                                                                                                                                                                                                                                                                                                                                               |
|                                          | Co-Investigator(s)      | Alp ARKUN, Jeffrey BENJAMIN, Hilary FAIRBROTHER, Laura MELVILLE                                                                                                                                                                                                                                                                                                                                                                                                               |
|                                          | Study Coordinator(s)    | Paris DATILLO                                                                                                                                                                                                                                                                                                                                                                                                                                                                 |
| Norton Brownsboro Hospital               | Principal Investigators | Ali CHOUCAIR, Nadeem TALPUR                                                                                                                                                                                                                                                                                                                                                                                                                                                   |
|                                          | Co-Investigator(s)      | Shervin DASHTI, Roger HUMPHRIES, Tom YAO                                                                                                                                                                                                                                                                                                                                                                                                                                      |
|                                          | Study Coordinator(s)    | Robyn MCLEAN                                                                                                                                                                                                                                                                                                                                                                                                                                                                  |
| Norton Hospital                          | Principal Investigators | Ali CHOUCAIR, Nadeem TALPUR                                                                                                                                                                                                                                                                                                                                                                                                                                                   |
|                                          | Co-Investigator(s)      | Shervin DASHTI, Roger HUMPHRIES, Tom YAO                                                                                                                                                                                                                                                                                                                                                                                                                                      |
|                                          | Study Coordinator(s)    | Robyn MCLEAN                                                                                                                                                                                                                                                                                                                                                                                                                                                                  |
| O'Connor Hospital                        | Principal Investigator  | Raul GUISADO                                                                                                                                                                                                                                                                                                                                                                                                                                                                  |
|                                          | Co-Investigator(s)      | Raj GUPTA, Jenelle JINDAL, Xihua SUN                                                                                                                                                                                                                                                                                                                                                                                                                                          |
|                                          | Study Coordinator(s)    | Karen DE LA CUESTA, Christine KELLER                                                                                                                                                                                                                                                                                                                                                                                                                                          |
| Penn Presbyterian Medical Center         | Principal Investigator  | Brett CUCCHIARA                                                                                                                                                                                                                                                                                                                                                                                                                                                               |
|                                          | Co-Investigator(s)      | Jill BAREN, Christina BLUM, Maria CHEN, Christopher FAVILLA, Kimberly GANNON, Judy JIA, Scott KASNER, Sami KHELLA, Donna KUROWSKI, Ava LIBERMAN, Caitlin LOOMIS, Jean LUCIANO, Michael MCGARVEY, Steven MESSE, Michael MULLEN, Claude NGUYEN, Laura STEIN, Jose TORRES, Ali ZANDIEH, Cen ZHANG                                                                                                                                                                                |
|                                          | Study Coordinator(s)    | Mary Elizabeth DESANTO                                                                                                                                                                                                                                                                                                                                                                                                                                                        |
| Pennsylvania Hospital                    | Principal Investigators | Brett CUCCHIARA, Christopher REES                                                                                                                                                                                                                                                                                                                                                                                                                                             |
|                                          | Co-Investigator(s)      | Jill BAREN, Christopher FAVILLA, Kimberly GANNON, Judy JIA, Scott KASNER, Donna KUROWSKI, Ava LIBERMAN, Jean LUCIANO, Michael MCGARVEY, Ellen MCPARTLAND-MONGIORI, Steven MESSE, Michael MULLEN, Claude NGUYEN, Paul NOVELLO, Laura STEIN, Ali ZANDIEH, Cen ZHANG                                                                                                                                                                                                             |

|                                                  |                         |                                                                                                                                                                                                                         |
|--------------------------------------------------|-------------------------|-------------------------------------------------------------------------------------------------------------------------------------------------------------------------------------------------------------------------|
|                                                  | Study Coordinator(s)    | Mary Elizabeth DESANTO, Scott DROBNIS                                                                                                                                                                                   |
| Portland VA<br>Medical Center                    | Principal Investigator  | Helmi LUTSEP                                                                                                                                                                                                            |
|                                                  | Co-Investigator(s)      | Hormozd BOZORGCHAMI, Wayne CLARK, Sierra FORD, Kory HERRICK, David HOAK, Olajide OLOGUNTOYE, Courtney TAKAHASHI, Craig WARDEN, Stewart WEBER                                                                            |
|                                                  | Study Coordinator(s)    | Jonathan FOLEY                                                                                                                                                                                                          |
| Regional Medical<br>Center of San Jose           | Principal Investigators | Raul GUISADO, Raj GUPTA                                                                                                                                                                                                 |
|                                                  | Co-Investigator(s)      | Jenelle JINDAL, James QUINN, Akshay SHAH                                                                                                                                                                                |
|                                                  | Study Coordinator(s)    | Christine KELLER                                                                                                                                                                                                        |
| Regions Hospital                                 | Principal Investigator  | Aaron BURNETT                                                                                                                                                                                                           |
|                                                  | Co-Investigator(s)      | Michelle BIROS, Mustapha EZZEDDINE, Vivian FINK, Bret HAAKE, Kurt ISENBERGER, Josh SALZMAN, Michael ZWANK                                                                                                               |
|                                                  | Study Coordinator(s)    | Kari KRAGNESS, Emily MISCHEL-ABRAMOWSKI, Alyssa MORRIS, Sandi WEWERKA                                                                                                                                                   |
| Renown Regional<br>Medical Center                | Principal Investigator  | Ivan LOPEZ                                                                                                                                                                                                              |
|                                                  | Study Coordinator(s)    | Peggie SMITH                                                                                                                                                                                                            |
| Rhode Island<br>Hospital                         | Principal Investigators | Brian SILVER, Shadi YAGHI                                                                                                                                                                                               |
|                                                  | Co-Investigator(s)      | Jill BAREN, Brett CUCCHIARA, Shawna CUTTING, Lindsey FULLER, Muhib KHAN, Lisa MERCK, Lori OLIVER, Ali SAAD, Jo-Ann SARAFIN, Todd SEIGEL, Matthew SIKET                                                                  |
|                                                  | Study Coordinator(s)    | Karina BERTSCH, Lesley D'URSO (Wasilewski), Ashley SCHOMER                                                                                                                                                              |
| Ridgeview<br>Medical Center                      | Principal Investigator  | David LARSON                                                                                                                                                                                                            |
|                                                  | Co-Investigator(s)      | Kevin BROWN, Mustapha EZZEDDINE                                                                                                                                                                                         |
|                                                  | Study Coordinator(s)    | Brenda ANDERSON, Jane ARCHER, Kathleen MILLER, Mindy RUMBOLZ                                                                                                                                                            |
| Robert Wood<br>Johnson<br>University<br>Hospital | Principal Investigators | James MCKINNEY, Deviyani MEHTA                                                                                                                                                                                          |
|                                                  | Co-Investigator(s)      | Catherine ALBRECHT, Jill BAREN, Brett CUCCHIARA, Subasini DASH, Robert EISENSTEIN, Raffi KAPITANYAN, Jonathan MCCOY, Mark MERLIN, Michelle MOCCIO, Ugo PAOLUCCI, Igor RYBINNIK, Chirag SHAH, Patricia SONSALLA, Win TOE |
|                                                  |                         |                                                                                                                                                                                                                         |
| Rush University<br>Medical Center                | Principal Investigator  | James CONNERS                                                                                                                                                                                                           |
|                                                  | Co-Investigator(s)      | Tom AUFDERHEIDE, Laurel CHERIAN (SMIT), Shawna CUTTING, Rima DAFER, Vivien LEE, Nicholas OSTERAAS, Sarah SONG, Alejandro VARGAS                                                                                         |
|                                                  | Study Coordinator(s)    | Stephanie DAHL, Tiffany SINGSON                                                                                                                                                                                         |
| San Francisco                                    | Principal Investigator  | Claude HEMPHILL                                                                                                                                                                                                         |

|                                         |                         |                                                                                                                                                                                                                                                                                                                                                                                                                                                                                                                                                                                                                                                                                                                                                   |
|-----------------------------------------|-------------------------|---------------------------------------------------------------------------------------------------------------------------------------------------------------------------------------------------------------------------------------------------------------------------------------------------------------------------------------------------------------------------------------------------------------------------------------------------------------------------------------------------------------------------------------------------------------------------------------------------------------------------------------------------------------------------------------------------------------------------------------------------|
| General Hospital                        | Co-Investigator(s)      | Ahmad AHMAD, Aimee AYSENNE, John BETJEMANN, Molly BURNETT, Tamika BURRUS, Elizabeth CAHILL, Sheila CHAN, Judy CHANG, Natalie CHENG, Roger CHENG, Rene COLORADO, Vanja DOUGLAS, Julia DURRANT, Nancy EDWARDS, Christine FOX, Alan GELB, Trevor GREGATH, Cathra HALABI, Karen HIRSCH, Andrew JOSEPHSON, Hooman KAMEL, Kevin KEENAN, Anthony KIM, Nerissa KO, Mohan KOTTAPALLY, Karl MEISEL, Asma MOHEET, Arturo MONTANO, Kazuma NAKAGAWA, Bharath NARAVETLA, Babak NAVI, Anh NGUYEN, Mai NGUYEN-HUYNH, Sharon POISSON, Prasanthi RAMANUJAM, Nirav SHAH, Michel SHAMY, Kevin SHAPIRO, Peyman SHIRANI, Vineeta SINGH, Neel SINGHAL, Wade SMITH, Karl SPORER, Abraham THOMAS, Shahed TOOSSI, Christine WONG, Alan YEE, Debbie YI MADHOK, QingYang YUAN |
|                                         | Study Coordinator(s)    | Michele MEEKER, Dominica RANDAZZO, Kelley ROSBOROUGH                                                                                                                                                                                                                                                                                                                                                                                                                                                                                                                                                                                                                                                                                              |
| Seton Medical Center                    | Principal Investigator  | Truman MILLING                                                                                                                                                                                                                                                                                                                                                                                                                                                                                                                                                                                                                                                                                                                                    |
|                                         | Study Coordinator(s)    | Laura LACHANCE                                                                                                                                                                                                                                                                                                                                                                                                                                                                                                                                                                                                                                                                                                                                    |
| Spectrum Health Hospitals - Butterworth | Principal Investigator  | John OOSTEMA (Adam)                                                                                                                                                                                                                                                                                                                                                                                                                                                                                                                                                                                                                                                                                                                               |
|                                         | Co-Investigator(s)      | Michael BROWN, Jeffrey JONES, Joshua REYNOLDS                                                                                                                                                                                                                                                                                                                                                                                                                                                                                                                                                                                                                                                                                                     |
|                                         | Study Coordinator(s)    | Tiffany FLEEGER                                                                                                                                                                                                                                                                                                                                                                                                                                                                                                                                                                                                                                                                                                                                   |
| St. Elizabeth Hospital                  | Principal Investigators | Rahul KARAMCHANDANI, Kyle WALSH                                                                                                                                                                                                                                                                                                                                                                                                                                                                                                                                                                                                                                                                                                                   |
|                                         | Co-Investigator(s)      | Opeolu ADEOYE, Jordan BONOMO, Joseph BRODERICK, Rhonda CADENA, Elisheva COLEMAN, Felipe DE LOS RIOS LA ROSA, Stacie DEMEL, Bryan ECKERLE, Simona FERIOLI, Matthew FLAHERTY, Rachel GARVIN, Anna GENSIC, Sabreena GILLOW, Aaron GROSSMAN, Jonah GROSSMAN, Laura HEITSCH, Adam JASNE, Daniel KANTER, Brian KATZ, Pooja KHATRI, Brett KISSELA, Dawn KLEINDORFER, William KNIGHT, Natalie KREITZER, Julian MACEDO, Jason MACKEY, Sharyl MARTINI, Erin MCDONOUGH, Meena MUNSHI, Brian OLOIZIA, Art PANCIOLI, Katrina PEARISO, Jonathan RATCLIFF, Sameer SHARMA, Blake SMITH, Michael STAR, Brian STETTLER, Daniel WOO, Muhammad ZAGHLOULEH                                                                                                             |
|                                         | Study Coordinator(s)    | Shannon DEEDS, Sara KEEGAN                                                                                                                                                                                                                                                                                                                                                                                                                                                                                                                                                                                                                                                                                                                        |
| St. Elizabeth Hospital Fort Thomas      | Principal Investigators | Rahul KARAMCHANDANI, Kyle WALSH                                                                                                                                                                                                                                                                                                                                                                                                                                                                                                                                                                                                                                                                                                                   |
|                                         | Co-Investigator(s)      | Opeolu ADEOYE, Jordan BONOMO, Joseph BRODERICK, Rhonda CADENA, Elisheva COLEMAN, Felipe DE LOS RIOS LA ROSA, Stacie DEMEL, Bryan ECKERLE, Simona FERIOLI, Matthew FLAHERTY, Rachel GARVIN, Anna GENSIC, Sabreena GILLOW, Aaron GROSSMAN, Jonah GROSSMAN, Laura HEITSCH, Adam JASNE, Daniel KANTER, Brian KATZ, Pooja KHATRI, Brett KISSELA, Dawn KLEINDORFER, William KNIGHT, Natalie KREITZER, Julian MACEDO, Jason MACKEY, Sharyl MARTINI, Erin MCDONOUGH, Meena MUNSHI, Brian OLOIZIA, Art PANCIOLI, Katrina PEARISO, Jonathan RATCLIFF, Sameer SHARMA, Blake SMITH, Michael STAR, Brian STETTLER, Daniel WOO, Muhammad ZAGHLOULEH                                                                                                             |
|                                         | Study Coordinator(s)    | Shannon DEEDS, Sara KEEGAN                                                                                                                                                                                                                                                                                                                                                                                                                                                                                                                                                                                                                                                                                                                        |

|                                            |                                               |                                                                                                                                                                                                                                                                                                                                                                                                                                                                                                                                                                                                                                                                                                           |
|--------------------------------------------|-----------------------------------------------|-----------------------------------------------------------------------------------------------------------------------------------------------------------------------------------------------------------------------------------------------------------------------------------------------------------------------------------------------------------------------------------------------------------------------------------------------------------------------------------------------------------------------------------------------------------------------------------------------------------------------------------------------------------------------------------------------------------|
| St. Elizabeth<br>Medical Center<br>South   | Principal Investigators<br>Co-Investigator(s) | Rahul KARAMCHANDANI, Kyle WALSH<br>Opeolu ADEOYE, Jordan BONOMO, Joseph BRODERICK,<br>Rhonda CADENA, Elisheva COLEMAN, Felipe DE LOS RIOS LA<br>ROSA, Stacie DEMEL, Bryan ECKERLE, Simona FERIOLI,<br>Matthew FLAHERTY, Rachel GARVIN, Anna GENSIC, Sabreena<br>GILLOW, Aaron GROSSMAN, Jonah GROSSMAN, Laura<br>HEITSCH, Adam JASNE, Daniel KANTER, Brian KATZ, Pooja<br>KHATRI, Brett KISSELA, Dawn KLEINDORFER, William KNIGHT,<br>Natalie KREITZER, Julian MACEDO, Jason MACKEY, Sharyl<br>MARTINI, Erin MCDONOUGH, Meena MUNSHI, Brian OLOIZIA,<br>Art PANCIOLI, Katrina PEARISO, Jonathan RATCLIFF, Sameer<br>SHARMA, Blake SMITH, Michael STAR, Brian STETTLER, Daniel<br>WOO, Muhammad ZAGHLOULEH |
|                                            | Study Coordinator(s)                          | Shannon DEEDS, Sara KEEGAN                                                                                                                                                                                                                                                                                                                                                                                                                                                                                                                                                                                                                                                                                |
| St. John Hospital<br>and Medical<br>Center | Principal Investigators<br>Co-Investigator(s) | Robert DUNNE, Claire PEARSON<br>Elizabeth BASCOM, Paul CULLIS, Patricia NOUHAN, Margarita<br>PENA, Makenzie THIMM, Robert WELCH, Michelle WIENER                                                                                                                                                                                                                                                                                                                                                                                                                                                                                                                                                          |
|                                            | Study Coordinator(s)                          | Lynne FROEHLICH                                                                                                                                                                                                                                                                                                                                                                                                                                                                                                                                                                                                                                                                                           |
| St. Joseph<br>Regional Health<br>Center    | Principal Investigator<br>Co-Investigator(s)  | Michael SPOHN<br>Derek CARAWAY, Paul GOEN, Brandon LEWIS, Michael<br>MCDONALD, Kimberly OAS, Marcus PURVIS, Carmen RAMIREZ                                                                                                                                                                                                                                                                                                                                                                                                                                                                                                                                                                                |
|                                            | Study Coordinator(s)                          | Debbie LEWIS, Donna WEBB                                                                                                                                                                                                                                                                                                                                                                                                                                                                                                                                                                                                                                                                                  |
| Stony Brook<br>University<br>Hospital      | Principal Investigator<br>Co-Investigator(s)  | Ethan BRANDLER<br>Laura DONARUMMO, Michael GUIDO, Candice PERKINS,<br>Galyna PUSHCHINSKA, Adam SINGER                                                                                                                                                                                                                                                                                                                                                                                                                                                                                                                                                                                                     |
|                                            | Study Coordinator(s)                          | Maria TAYLOR                                                                                                                                                                                                                                                                                                                                                                                                                                                                                                                                                                                                                                                                                              |
| SUNY Downstate<br>Medical Center           | Principal Investigators                       | Pia CHATTERJEE, Steven LEVINE, Adrian MARCHIDANN,<br>Richard SINERT                                                                                                                                                                                                                                                                                                                                                                                                                                                                                                                                                                                                                                       |
|                                            | Co-Investigator(s)                            | Clotilde BALUCANI, Ethan BRANDLER, Qing HAO, Richard<br>JACKSON, Yongwoo KIM, Susan LAW, Jennifer MARTINDALE,<br>Jay MELTON, Lorenzo PALADINO, Diana ROJAS-SOTO, Artem<br>SUNIK, Benedict TAN, Helen VALSAMIS, Volodymyr<br>VULKANOV, Shahriar ZEHTABCHI                                                                                                                                                                                                                                                                                                                                                                                                                                                  |
|                                            | Study Coordinator(s)                          | Vanessa ARNEDO, Nadege GILLES, Saroj KUNNAKKAT,<br>Catherine LUSHBOUGH, Sarah WEINGAST (ZELONIS)                                                                                                                                                                                                                                                                                                                                                                                                                                                                                                                                                                                                          |
| The Jewish                                 | Principal Investigators                       | Rahul KARAMCHANDANI, Kyle WALSH                                                                                                                                                                                                                                                                                                                                                                                                                                                                                                                                                                                                                                                                           |



|                                      |                        |                                                                                                                                                                                                                                                                                                                                                                                                                                                                                                                                                                                                                                                                                                                                                                                               |
|--------------------------------------|------------------------|-----------------------------------------------------------------------------------------------------------------------------------------------------------------------------------------------------------------------------------------------------------------------------------------------------------------------------------------------------------------------------------------------------------------------------------------------------------------------------------------------------------------------------------------------------------------------------------------------------------------------------------------------------------------------------------------------------------------------------------------------------------------------------------------------|
| Hospital                             | Co-Investigator(s)     | Opeolu ADEOYE, Jordan BONOMO, Joseph BRODERICK, Rhonda CADENA, Elisheva COLEMAN, Felipe DE LOS RIOS LA ROSA, Stacie DEMEL, Bryan ECKERLE, Simona FERIOLI, Matthew FLAHERTY, Rachel GARVIN, Anna GENSIC, Sabreena GILLOW, Aaron GROSSMAN, Jonah GROSSMAN, Laura HEITSCH, Adam JASNE, Daniel KANTER, Brian KATZ, Pooja KHATRI, Charles KIRCHER, Brett KISSELA, Dawn KLEINDORFER, William KNIGHT, Natalie KREITZER, Julian MACEDO, Jason MACKEY, Sharyl MARTINI, Erin MCDONOUGH, Eva MISTRY, Meena MUNSHI, Brian OLOIZIA, Art PANCIOLI, Katrina PEARISO, Jonathan RATCLIFF, Sameer SHARMA, Blake SMITH, Michael STAR, Brian STETTLER, Daniel WOO, Muhammad ZAGHLOULEH                                                                                                                            |
|                                      | Study Coordinator(s)   | Shannon DEEDS, Sara KEEGAN                                                                                                                                                                                                                                                                                                                                                                                                                                                                                                                                                                                                                                                                                                                                                                    |
| Thomas Jefferson University Hospital | Principal Investigator | AnnaMarie CHANG                                                                                                                                                                                                                                                                                                                                                                                                                                                                                                                                                                                                                                                                                                                                                                               |
|                                      | Co-Investigator(s)     | Norman AJIBOYE, Sanjay ANANDARAM, Rodney BELL, Lisa BOWMAN, Shruti CHANDRA, Nina GENTILE, Jack JALLO, William MCBRIDE, Michael MOUSSOUTTAS, Maria Carissa PINEDA, Pranoti PRADHAN, Ray REGAN, Fred RINCON, Diana TZENG, Jacqueline URTECHO, Matthew VIBBERT, Jennifer WHITE, Sridhara YADDANAPUDI                                                                                                                                                                                                                                                                                                                                                                                                                                                                                             |
|                                      | Study Coordinator(s)   | Amanda FURLONG-SALVATORE, Jennifer GLENDENING, Nicole RENZI, Kiriaki SERENIDIS, Meghan-Patricia WAKEFIELD, Melissa WITT                                                                                                                                                                                                                                                                                                                                                                                                                                                                                                                                                                                                                                                                       |
| UC Davis Medical Center              | Principal Investigator | Daniel NISHIJIMA                                                                                                                                                                                                                                                                                                                                                                                                                                                                                                                                                                                                                                                                                                                                                                              |
|                                      | Co-Investigator(s)     | Glen JICKLING, Kwan NG                                                                                                                                                                                                                                                                                                                                                                                                                                                                                                                                                                                                                                                                                                                                                                        |
|                                      | Study Coordinator(s)   | Michaela CANOVA                                                                                                                                                                                                                                                                                                                                                                                                                                                                                                                                                                                                                                                                                                                                                                               |
| UCSF Medical Center                  | Principal Investigator | Wade SMITH                                                                                                                                                                                                                                                                                                                                                                                                                                                                                                                                                                                                                                                                                                                                                                                    |
|                                      | Co-Investigator(s)     | Ahmad AHMAD, Aimee AYSENNE, John BETJEMANN, Molly BURNETT, Tamika BURRUS, Elizabeth CAHILL, Sheila CHAN, Judy CHANG, Natalie CHENG, Roger CHENG, Rene COLORADO, Amar DHAND, Vanja DOUGLAS, Julia DURRANT, Nancy EDWARDS, Christine FOX, Alan GELB, Trevor GREGATH, Cathra HALABI, Claude HEMPHILL, Karen HIRSCH, Andrew JOSEPHSON, Hooman KAMEL, Kevin KEENAN, Anthony KIM, Nerissa KO, Mohan KOTTAPALLY, Kathryn KVAM, Karl MEISEL, Asma MOHEET, Arturo MONTANO, Kazuma NAKAGAWA, Bharath NARAVETLA, Babak NAVI, Anh NGUYEN, Mai NGUYEN-HUYNH, Sharon POISSON, Prasanthi RAMANUJAM, Maulik SHAH, Nirav SHAH, Michel SHAMY, Kevin SHAPIRO, Peyman SHIRANI, Vineeta SINGH, Neel SINGHAL, Karl SPORER, Abraham THOMAS, Shahed TOOSSI, Christine WONG, Alan YEE, Debbie YI MADHOK, QingYang YUAN |
|                                      | Study Coordinator(s)   | Michele MEEKER, Dominica RANDAZZO, Kelley ROSBOROUGH                                                                                                                                                                                                                                                                                                                                                                                                                                                                                                                                                                                                                                                                                                                                          |
| United Hospital                      | Principal Investigator | Sandra HANSON                                                                                                                                                                                                                                                                                                                                                                                                                                                                                                                                                                                                                                                                                                                                                                                 |
|                                      | Co-Investigator(s)     | Ganesh ASAITHAMBI, Michelle BIROS, Jesse CORRY, Mustapha EZZEDDINE, Dimitrios GIANNAKIDIS, Jane MONITA, Sheetal PATEL, Karen PORTH                                                                                                                                                                                                                                                                                                                                                                                                                                                                                                                                                                                                                                                            |

|                                                 |                         |                                                                                                                                                                                                                                                                                                                                                                                                                                                                                                                                                                                                                                                                                                                        |
|-------------------------------------------------|-------------------------|------------------------------------------------------------------------------------------------------------------------------------------------------------------------------------------------------------------------------------------------------------------------------------------------------------------------------------------------------------------------------------------------------------------------------------------------------------------------------------------------------------------------------------------------------------------------------------------------------------------------------------------------------------------------------------------------------------------------|
|                                                 | Study Coordinator(s)    | Bridget HO                                                                                                                                                                                                                                                                                                                                                                                                                                                                                                                                                                                                                                                                                                             |
| University of Cincinnati Medical Center         | Principal Investigators | Rahul KARAMCHANDANI, Kyle WALSH                                                                                                                                                                                                                                                                                                                                                                                                                                                                                                                                                                                                                                                                                        |
|                                                 | Co-Investigator(s)      | Opeolu ADEOYE, Samir BELAGAJE, Jordan BONOMO, Joseph BRODERICK, Rhonda CADENA, Elisheva COLEMAN, Felipe DE LOS RIOS LA ROSA, Stacie DEMEL, Bryan ECKERLE, Simona FERIOLI, Matthew FLAHERTY, Sabreena GALLOW, Rachel GARVIN, Anna GENSIC, Sabreena GILLOW, Aaron GROSSMAN, Jonah GROSSMAN, Laura HEITSCH, Adam JASNE, Daniel KANTER, Brian KATZ, Pooja KHATRI, Charles KIRCHER, Brett KISSELA, Dawn KLEINDORFER, William KNIGHT, Shannon KOHAKE, Natalie KREITZER, Julian MACEDO, Jason MACKEY, Sharyl MARTINI, Erin MCDONOUGH, Eva MISTRY, Meena MUNSHI, Brian OLOIZIA, Arthur PANCIOLI, Katrina PEARISO, Jonathan RATCLIFF, Sameer SHARMA, Blake SMITH, Michael STAR, Brian STETTLER, Daniel WOO, Muhammad ZAGHLOULEH |
|                                                 | Study Coordinator(s)    | Shannon Iris DEEDS, Irene Ewing, Sara KEEGAN                                                                                                                                                                                                                                                                                                                                                                                                                                                                                                                                                                                                                                                                           |
| University of Kansas Hospital                   | Principal Investigator  | Michael ABRAHAM                                                                                                                                                                                                                                                                                                                                                                                                                                                                                                                                                                                                                                                                                                        |
|                                                 | Co-Investigator(s)      | Rawan ALBADAREEN, Bradley BARTH, Michelle BIROS, Chad CANNON, Colleen LECHTENBERG, Manoj MITTAL, Michael RIPPEE, Lee ROSTERMAN, Craig SHIPLEY, Jayashree SUNDARARAJAN, Yunxia WANG                                                                                                                                                                                                                                                                                                                                                                                                                                                                                                                                     |
|                                                 | Study Coordinator(s)    | Alison BOYDSTON, Shannon GIFFORD                                                                                                                                                                                                                                                                                                                                                                                                                                                                                                                                                                                                                                                                                       |
| University of Maryland Medical Center           | Principal Investigator  | Carolyn CRONIN                                                                                                                                                                                                                                                                                                                                                                                                                                                                                                                                                                                                                                                                                                         |
|                                                 | Co-Investigator(s)      | Michael ABRAHAM, Ermias AYTENFISU, John COLE, Tarra DUTTA, Lisa HERMANN, Jon M. HIRSHON, Chandni KALARIA, Steven KITTNER, Jose MERINO, Melissa MOTTA, Michael PHIPPS, Anna ROSENBAUM, Jay SHAH, Kevin SHETH, Christopher STACK, Barney STERN, Marcella WOZNIAK                                                                                                                                                                                                                                                                                                                                                                                                                                                         |
|                                                 | Study Coordinator(s)    | Cameron DELL, Virginia GANLEY, Mary J. SPARKS, Tiffany WATSON                                                                                                                                                                                                                                                                                                                                                                                                                                                                                                                                                                                                                                                          |
| University of Minnesota Medical Center Hospital | Principal Investigator  | Mustapha EZZEDDINE                                                                                                                                                                                                                                                                                                                                                                                                                                                                                                                                                                                                                                                                                                     |
|                                                 | Co-Investigator(s)      | Mohammed ALKUWAITI, Shola ALUKO, David ANDERSON, Ganesh ASAITHAMBI, Kristen BARKLOW, Oladi BENTHO, Michelle BIROS, Laura FOSTER, Mikayel GRIGORYAN, Ameer HASSAN, Taka HIGASHIMORI, Haitham HUSSEIN, Vik JADHAV, Jessica JARNOT, Daraspreet KAINTH, Amir KHAN, Jae KIM, Saritha KUNDOOR, Shailesh MALE, Tapan MEHTA, Benjamin MILLER, Cathy O'BRIEN, Haejoe PARK, Rwoof RESHI, Gustavo RODRIGUEZ, Kalyan SAJJA, Divyajot SANDHU, Biggya SAPKOTA, Kenneth SHEA, Nathan SIT, Jamie STARKS, Christopher STREIB, Robert TAYLOR, Wondwossen TEKLE, Ruth THOMSON, Huseyin TORE, Haralabos ZACHARATOS                                                                                                                         |
|                                                 | Study Coordinator(s)    | Audrey HENDRICKSON, Kathleen MILLER, Mindy RUMBOLZ, Julie SCHERBER, Abbey STAUGAITIS                                                                                                                                                                                                                                                                                                                                                                                                                                                                                                                                                                                                                                   |
| University of New Mexico Hospital               | Principal Investigators | Christopher CALDER, Branko HUISA, Vishnumurthy SHUSHRUTHA HEDNA                                                                                                                                                                                                                                                                                                                                                                                                                                                                                                                                                                                                                                                        |
|                                                 | Co-Investigator(s)      | Kurt DENNINGHOFF, Marc MALKOFF, Matthew STARR                                                                                                                                                                                                                                                                                                                                                                                                                                                                                                                                                                                                                                                                          |
|                                                 | Study Coordinator(s)    | Jill PRESTOPNIK                                                                                                                                                                                                                                                                                                                                                                                                                                                                                                                                                                                                                                                                                                        |

|                                           |                                                                           |                                                                                                                                                                                                                                                                                                                                                                                                  |
|-------------------------------------------|---------------------------------------------------------------------------|--------------------------------------------------------------------------------------------------------------------------------------------------------------------------------------------------------------------------------------------------------------------------------------------------------------------------------------------------------------------------------------------------|
| University of Toledo Medical Center       | Principal Investigator<br>Co-Investigator(s)<br>Study Coordinator(s)      | Mouhammad JUMAA<br>Gretchen TIETJEN, Syed ZAIDI<br>Andrea KORSNACK                                                                                                                                                                                                                                                                                                                               |
| UPMC Northwest                            | Principal Investigators<br>Co-Investigator(s)<br><br>Study Coordinator(s) | Vivek REDDY, Matthew STARR<br>Amin AGHAEBRAHIM, Cliff CALLAWAY, David CAMPBELL,<br>Cameron DEZFULIAN, Ankur DOSHI, Dan-Victor GIURGIUTIU,<br>Deepak GULATI, Frank GUYETTE, Maxim HAMMER, Ashutosh<br>JADHAV, Tudor JOVIN, James MCLAUGHLIN, Jon<br>RITTENBERGER, Marcelo ROCHA, Christopher STREIB, Ruta<br>TOTORAITIS<br>Sara DIFIORE, Mary KRUTH                                               |
| UPMC Presbyterian Hospital                | Principal Investigators<br>Co-Investigator(s)<br><br>Study Coordinator(s) | Vivek REDDY, Matthew STARR<br>Amin AGHAEBRAHIM, Cliff CALLAWAY, David CAMPBELL,<br>Ankur DOSHI, Jonathan ELMER, Dan-Victor GIURGIUTIU,<br>Deepak GULATI, Frank GUYETTE, Maxim HAMMER, Anat<br>HOREV, Ashutosh JADHAV, Tudor JOVIN, Sunanda NANDURI,<br>Srikant RANGARAJU, Jon RITTENBERGER, Marcelo ROCHA,<br>Christopher STREIB, Ruta TOTORAITIS, Lawrence WECHSLER<br>Sara DIFIORE, Mary KRUTH |
| UPMC Shadyside Hospital                   | Principal Investigators<br>Co-Investigator(s)<br><br>Study Coordinator(s) | Vivek REDDY, Matthew STARR<br>Amin AGHAEBRAHIM, Cliff CALLAWAY, David CAMPBELL,<br>Cameron DEZFULIAN, Ankur DOSHI, Jonathan ELMER, Dan-<br>Victor GIURGIUTIU, Deepak GULATI, Frank GUYETTE, Maxim<br>HAMMER, Ashutosh JADHAV, Tudor JOVIN, Srikant<br>RANGARAJU, Jon RITTENBERGER, Marcelo ROCHA,<br>Christopher STREIB, Ruta TOTORAITIS<br>Sara DIFIORE, Mary KRUTH                             |
| Valley Baptist Medical Center - Harlingen | Principal Investigator<br>Co-Investigator(s)<br><br>Study Coordinator(s)  | Ameer HASSAN<br>Elizabeth JONES, Julio OLMEDA, Victoria PARADA,<br>Wondwossen TEKLE<br>Cacy CATE, Lisa JONES-FULLINGIM, Pamela NAUERTH, Olive<br>SANCHEZ                                                                                                                                                                                                                                         |
| VCU Medical Center                        | Principal Investigator<br>Co-Investigator(s)<br>Study Coordinator(s)      | Warren FELTON<br>Joseph ORNATO<br>Mary Beth DONNER, Jeneane HENRY                                                                                                                                                                                                                                                                                                                                |
| William Beaumont Hospital                 | Principal Investigator<br>Co-Investigator(s)<br><br>Study Coordinator(s)  | Robert SWOR<br>Carol CLARK, Russell RAE, Vito ROCCO, Sunitha<br>SANTHAKUMAR, Kelly SAWYER, Michelle TRACY-WIENER,<br>Robert WELCH<br>Heather GRACE, Brian WALKER                                                                                                                                                                                                                                 |
| William Beaumont Hospital-Troy            | Principal Investigator<br>Co-Investigator(s)<br><br>Study Coordinator(s)  | Aveh BASTANI<br>Matthew CHRISTENSEN, Aharon Gedaliah COOPER, Steven<br>DIMSDALE, David DONALDSON, Michael OPSOMMER, Albert<br>ROCCHINI, Robert SWOR, Brett TODD, Robert WELCH<br>Heonia HILLOCK, Pamela MARSACK                                                                                                                                                                                  |
| Yale-New Haven Hospital                   | Principal Investigator<br>Study Coordinator(s)                            | Joseph SCHINDLER<br>Zachary KING, Cora ORMSETH, Lynda RYALL, Sonya ZHOU                                                                                                                                                                                                                                                                                                                          |

## SUMMARY OF DELIBERATIONS BY THE POINT DSMB FOR STOPPING THE POINT TRIAL EARLY

Prepared by

Peter Gilbert  
Misha Eliasziw  
Gregory J. del Zoppo

09 April, 2018

The Statistical Analysis Plan for the POINT trial specified the use of the O'Brien-Fleming alpha-spending function approach for the interim analyses, whereby the looks would occur after approximately 1/3 and 2/3 of the total anticipated number of primary endpoint events (530) had been observed and adjudicated. The investigators chose the alpha-spending function approach because it allows flexibility in the number and timing of interim analyses.

Early on, it became clear to the DSMB that the overall primary endpoint event rate in the trial was too low for the planned sample size of 4,150 participants to ever reach 530 primary events and the DSMB decided that due diligence dictated that a first interim analysis should be performed in March 2013 even though one-third of 530 events hadn't occurred. Because at the time of the first interim analysis 33% (n=1,352) of the participants had been enrolled, this ensured that the investigators and investigative team would remain blinded to the lower-than-expected overall event rate.

Following the rules set out in the Statistical Analysis Plan, the sample size following the first interim analysis was increased to 5,840 participants and the statistical power was reduced from 90% to 80%. This resulted in revising the total expected number of endpoint events to 388. As time went by, however, it became clear that even this number would not be reached given the overall event rate which, inexplicably, declined continually throughout the trial.

The observed Hazard Ratios in the trial (for adjudicated plus unadjudicated events) were 0.77, 0.70 and 0.75 for the primary efficacy outcome at the three interim analyses (database frozen on March 2013, April 2016, and November 2017, respectively), with observed p-values of 0.22, 0.012 and 0.015, and 91, 206, and 275 total events, respectively. Similar results held for analyses using adjudicated events only.

At the time of the second interim analysis, the p-value came close to crossing the stopping boundary (0.0079) based on the expected number of total enrollments. This information fraction was chosen because it was clear that calculating the information fraction based on an anticipated 388 total events was inappropriate.

The DSMB consisted of very experienced clinical trialists who were well-aware of the phenomenon that trials stopped early may overestimate the effectiveness of treatment. The DSMB wanted to make sure that the treatment effect observed at the second interim analysis

was “real” and not a “random high.” They asked the unblinded statistician to repeat the analysis for the primary endpoint using only the first 125 and the first 160 primary events. These analyses showed similar treatment effects and provided assurance that the observed HR was real. The DSMB also considered the results from the CHANCE trial during their deliberations, and the fact that the CHANCE trial showed a similar treatment effect was reassuring.

By this time in the trial, the DSMB felt confident that dual therapy was efficacious. Nevertheless, the DSMB decided to continue the trial until the interim analysis stopping boundary was officially crossed.

In addition, the DSMB had been monitoring the safety data in the trial on a monthly basis and had consistently observed an excess of hemorrhages (of all types and severities) in the dual therapy arm. The overall number of hemorrhages was small, however, and it was not until August 2017 when the 95% confidence interval around the RR (and HR) for major hemorrhage – the primary safety outcome – excluded 1. Because historically only very few clinical trials in this area showed a significant difference in major hemorrhages, and to be certain that the safety trend was sustained, it was agreed to follow the major hemorrhage events to the semi-annual meeting in December, 2017.

The DSMB anticipated that, given the trends observed over the course of the trial, a sufficient number of primary endpoint events and major hemorrhage events could accumulate by the time of its semi-annual meeting in December 2017 to breach the stopping boundaries, and therefore decided to request a third interim analysis. The analysis did indeed show that the stopping boundaries had been crossed. Thus, the DSMB recommended to the NINDS that the study stop enrollment because the trial had crossed the pre-specified safety threshold for major hemorrhage. At the same time, the primary efficacy endpoint was met and additional enrollment was not expected to markedly change the observed hazard ratio of 0.75, which was the target specified in the Statistical Analysis Plan.

Please let us know if you require further information or documentation.

**Table S1. Summary of serious adverse events by MedDRA body system, excluding components of the primary efficacy outcome measure, by intention to treat.\***

| Body System                                                       | Number (%) of patients          |                     |
|-------------------------------------------------------------------|---------------------------------|---------------------|
|                                                                   | Clopidogrel-Aspirin<br>(N=2432) | Aspirin<br>(N=2449) |
| Total                                                             | 295 (12.1%)                     | 272 (11.1%)         |
| Nervous system disorders                                          | 113 (4.6%)                      | 115 (4.7%)          |
| Cardiac disorders                                                 | 48 (2.0%)                       | 33 (1.3%)           |
| Vascular disorders                                                | 17 (0.7%)                       | 24 (1.0%)           |
| Infections and infestations                                       | 24 (1.0%)                       | 16 (0.7%)           |
| Gastrointestinal disorders                                        | 24 (1.0%)                       | 14 (0.6%)           |
| Surgical and medical procedures                                   | 15 (0.6%)                       | 19 (0.8%)           |
| Respiratory, thoracic and mediastinal disorders                   | 14 (0.6%)                       | 14 (0.6%)           |
| Psychiatric disorders                                             | 14 (0.6%)                       | 13 (0.5%)           |
| General disorders and administration site conditions              | 19 (0.8%)                       | 5 (0.2%)            |
| Injury, poisoning and procedural complications                    | 12 (0.5%)                       | 7 (0.3%)            |
| Renal and urinary disorders                                       | 10 (0.4%)                       | 7 (0.3%)            |
| Neoplasms benign, malignant,d unspecified (incl cysts and polyps) | 6 (0.2%)                        | 9 (0.4%)            |
| Metabolism and nutrition disorders                                | 10 (0.4%)                       | 4 (0.2%)            |
| Musculoskeletal and connective tissue disorders                   | 6 (0.2%)                        | 4 (0.2%)            |
| Skin and subcutaneous tissue disorders                            | 8 (0.3%)                        | 2 (0.1%)            |
| Congenital, familial and genetic disorders                        | 2 (0.1%)                        | 2 (0.1%)            |
| Hepatobiliary disorders                                           | 4 (0.2%)                        | 0 (0.0%)            |
| Investigations                                                    | 3 (0.1%)                        | 0 (0.0%)            |
| Eye disorders                                                     | 1 (0.0%)                        | 2 (0.1%)            |
| Blood and lymphatic system disorders                              | 1 (0.0%)                        | 2 (0.1%)            |
| Ear and labyrinth disorders                                       | 1 (0.0%)                        | 2 (0.1%)            |
| Immune system disorders                                           | 1 (0.0%)                        | 1 (0.0%)            |
| Reproductive system and breast disorders                          | 1 (0.0%)                        | 0 (0.0%)            |

\*There were no differences by treatment group except for general disorders and administration site conditions (p=0.004).

**Table S2. Summary of serious adverse events by MedDRA body system, excluding components of the primary efficacy outcome measure, in an as-treated analysis.\***

| Body System                                                         | Number (%) of patients       |                  |
|---------------------------------------------------------------------|------------------------------|------------------|
|                                                                     | Clopidogrel-Aspirin (N=2398) | Aspirin (N=2421) |
| Total                                                               | 254 (10.6%)                  | 221 (9.1%)       |
| Nervous system disorders                                            | 95 (4.0%)                    | 98 (4.0%)        |
| Cardiac disorders                                                   | 37 (1.5%)                    | 30 (1.2%)        |
| Vascular disorders                                                  | 14 (0.6%)                    | 20 (0.8%)        |
| Gastrointestinal disorders                                          | 20 (0.8%)                    | 8 (0.3%)         |
| Infections and infestations                                         | 17 (0.7%)                    | 11 (0.5%)        |
| Psychiatric disorders                                               | 12 (0.5%)                    | 10 (0.4%)        |
| General disorders and administration site conditions                | 16 (0.7%)                    | 5 (0.2%)         |
| Surgical and medical procedures                                     | 12 (0.5%)                    | 9 (0.4%)         |
| Respiratory, thoracic and mediastinal disorders                     | 10 (0.4%)                    | 9 (0.4%)         |
| Injury, poisoning and procedural complications                      | 9 (0.4%)                     | 7 (0.3%)         |
| Renal and urinary disorders                                         | 9 (0.4%)                     | 6 (0.2%)         |
| Metabolism and nutrition disorders                                  | 8 (0.3%)                     | 2 (0.1%)         |
| Musculoskeletal and connective tissue disorders                     | 6 (0.3%)                     | 3 (0.1%)         |
| Skin and subcutaneous tissue disorders                              | 8 (0.3%)                     | 1 (0.0%)         |
| Neoplasms benign, malignant and unspecified (incl cysts and polyps) | 4 (0.2%)                     | 4 (0.2%)         |
| Congenital, familial and genetic disorders                          | 1 (0.0%)                     | 2 (0.1%)         |
| Eye disorders                                                       | 1 (0.0%)                     | 2 (0.1%)         |
| Blood and lymphatic system disorders                                | 1 (0.0%)                     | 2 (0.1%)         |
| Ear and labyrinth disorders                                         | 1 (0.0%)                     | 2 (0.1%)         |
| Investigations                                                      | 2 (0.1%)                     | 0 (0.0%)         |
| Immune system disorders                                             | 1 (0.0%)                     | 1 (0.0%)         |
| Hepatobiliary disorders                                             | 2 (0.1%)                     | 0 (0.0%)         |
| Reproductive system and breast disorders                            | 1 (0.0%)                     | 0 (0.0%)         |

\*There were no differences by treatment group except for gastrointestinal disorders (p=0.02) and general disorders and administration site conditions (p=0.02).

**Table S3. Frequency of study drug discontinuation by reason.**

|                      |                                                                   | Treatment           |         |         |         | Total |         |
|----------------------|-------------------------------------------------------------------|---------------------|---------|---------|---------|-------|---------|
|                      |                                                                   | Clopidogrel-Aspirin |         | Aspirin |         |       |         |
|                      |                                                                   | N                   | %       | N       | %       | N     | %       |
| <b>Total</b>         |                                                                   | 721                 | 100.0 % | 674     | 100.0 % | 1395  | 100.0 % |
| <b>Decision Type</b> | <b>Discontinuation Reason</b>                                     |                     |         |         |         |       |         |
| Physician Decision   | Candidate for prohibited med                                      | 151                 | 20.9 %  | 157     | 23.2 %  | 308   | 22.0 %  |
|                      | Experienced a possibly related adverse event (headache, GI, etc.) | 179                 | 24.8 %  | 117     | 17.3 %  | 296   | 21.2 %  |
|                      | Primary physician discontinued                                    | 103                 | 14.2 %  | 105     | 15.5 %  | 208   | 14.9 %  |
|                      | Experienced an outcome event                                      | 44                  | 6.1 %   | 50      | 7.4 %   | 94    | 6.7 %   |
|                      | Pre-surgery or procedure and/or post-surgery or procedure         | 17                  | 2.3 %   | 20      | 2.9 %   | 37    | 2.6 %   |
| Patient Decision     | Other ongoing intervening illness                                 | 9                   | 1.2 %   | 15      | 2.2 %   | 24    | 1.7 %   |
|                      | Declined continuation after reconsideration                       | 119                 | 16.5 %  | 105     | 15.5 %  | 224   | 16.0 %  |
|                      | Declined continuation for unspecified reasons                     | 21                  | 2.9 %   | 27      | 4.0 %   | 48    | 3.4 %   |
|                      | Subject error                                                     | 11                  | 1.5 %   | 4       | 0.5 %   | 15    | 1.0 %   |
|                      | Study medication lost                                             | 5                   | 0.6 %   | 8       | 1.1 %   | 13    | 0.9 %   |
| Study Team Decision  | General (loss of interest)                                        | 2                   | 0.2 %   | 8       | 1.1 %   | 10    | 0.7 %   |
|                      | Incorrect qualifying event diagnosis                              | 38                  | 5.2 %   | 44      | 6.5 %   | 82    | 5.8 %   |
|                      | Site discontinued study medication                                | 11                  | 1.5 %   | 7       | 1.0 %   | 18    | 1.2 %   |
| Other                | Other                                                             | 8                   | 1.1 %   | 5       | 0.7 %   | 13    | 0.9 %   |
|                      | Nursing home refused to administer                                | 3                   | 0.4 %   | 2       | 0.2 %   | 5     | 0.3 %   |



**Table S4. Efficacy and Safety Stratified by Time Period**

| Time Period | Outcome                                         | Clopidogrel-Aspirin (N=2432) |              | Aspirin (N=2449)        |              | Hazard Ratio (95% CI) | P Value |
|-------------|-------------------------------------------------|------------------------------|--------------|-------------------------|--------------|-----------------------|---------|
|             |                                                 | Patients with Event no.      | Event Rate % | Patients with Event no. | Event Rate % |                       |         |
| 0-7 days    | Ischemic stroke, MI, or ischemic vascular death | 70                           | 2.9%         | 111                     | 4.5%         | 0.74 (0.55 - 0.99)    | 0.04    |
|             | Major hemorrhage                                | 7                            | 0.3%         | 4                       | 0.2%         | 1.82 (0.53 - 6.22)    | 0.34    |
| 8-90 days   | Ischemic stroke, MI, or ischemic vascular death | 51                           | 2.1%         | 49                      | 2.0%         | 1.03 (0.70-1.53)      | 0.88    |
|             | Major hemorrhage                                | 16                           | 0.7%         | 6                       | 0.2%         | 2.69 (1.05 - 6.86)    | 0.04    |
| 0-30 days   | Ischemic stroke, MI, or ischemic vascular death | 96                           | 3.9%         | 141                     | 5.8%         | 0.73 (0.56 - 0.95)    | 0.02    |
|             | Major hemorrhage                                | 12                           | 0.5%         | 6                       | 0.2%         | 2.05 (0.76 - 5.56)    | 0.16    |
| 31-90 days  | Ischemic stroke, MI, or ischemic vascular death | 25                           | 1.0%         | 19                      | 0.8%         | 1.30 (0.72 - 2.36)    | 0.39    |
|             | Major hemorrhage                                | 11                           | 0.5%         | 4                       | 0.2%         | 2.77 (0.88 - 8.70)    | 0.08    |

**Table S5. Additional Baseline Characteristics of the Participants\***

| <b>Characteristic</b>                                                                      | <b>Clopidogrel-Aspirin<br/>(N=2432)</b> | <b>Aspirin<br/>(N=2449)</b> |
|--------------------------------------------------------------------------------------------|-----------------------------------------|-----------------------------|
| Enrolling Country - no. (%)                                                                |                                         |                             |
| Australia                                                                                  | 53 (2.2%)                               | 51 (2.1%)                   |
| Canada                                                                                     | 121 (5.0%)                              | 119 (4.9%)                  |
| Finland                                                                                    | 25 (1.0%)                               | 25 (1.0%)                   |
| France                                                                                     | 51 (2.1%)                               | 47 (1.9%)                   |
| Germany                                                                                    | 8 (0.3%)                                | 10 (0.4%)                   |
| Mexico                                                                                     | 5 (0.2%)                                | 4 (0.2%)                    |
| New Zealand                                                                                | 3 (0.1%)                                | 4 (0.2%)                    |
| Spain                                                                                      | 119 (4.9%)                              | 122 (5.0%)                  |
| United Kingdom                                                                             | 33 (1.4%)                               | 38 (1.6%)                   |
| United States                                                                              | 2014 (82.8%)                            | 2029 (82.9%)                |
| Systolic blood pressure (mmHg) - median (interquartile range)                              | 159.0 (143.0-180.0)                     | 159.0 (142.0-179.0)         |
| Diastolic blood pressure (mmHg) - median (interquartile range)                             | 87.0 (77.0-98.0)                        | 87.0 (76.0-98.0)            |
| Medical History - no. (%)                                                                  |                                         |                             |
| Congestive Heart Failure                                                                   | 64 (2.6%)                               | 62 (2.5%)                   |
| Atrial fibrillation                                                                        | 31 (1.3%)                               | 18 (0.7%)                   |
| Current tobacco smoker – no. (%)                                                           | 496 (20.4%)                             | 508 (20.8%)                 |
| Time from randomization to study drug administration (h) -<br>median (interquartile range) | 1.0 (0.0-1.0)                           | 1.0 (0.0-1.0)               |

\*The differences in baseline characteristics between the treatment groups were not significant.

**Table S6. Pre-specified Secondary and Tertiary Analyses**

| Outcome                                                                                                                                                         | Clopidogrel-Aspirin     |              | Aspirin                 |              | Hazard Ratio<br>(95% CI)       | P Value        |
|-----------------------------------------------------------------------------------------------------------------------------------------------------------------|-------------------------|--------------|-------------------------|--------------|--------------------------------|----------------|
|                                                                                                                                                                 | (N=2432)                |              | (N=2449)                |              |                                |                |
|                                                                                                                                                                 | Patients with Event no. | Event Rate % | Patients with Event no. | Event Rate % |                                |                |
| <b>Secondary Analyses (as-treated sample)</b>                                                                                                                   | <b>(N=2398)</b>         |              | <b>(N=2421)</b>         |              |                                |                |
| Primary Outcome: ischemic stroke, MI, or ischemic vascular death analyzed with the as-treated sample                                                            | 102                     | 4.3%         | 141                     | 5.8%         | 0.73 (0.56 -- 0.94)            | 0.01           |
| Primary safety outcome: major hemorrhage analyzed with the as-treated sample                                                                                    | 21                      | 0.9%         | 6                       | 0.2%         | 3.57 (1.44 -- 8.85)            | <0.01          |
| <b>Tertiary Analyses (Intent-to-treat sample)</b>                                                                                                               | <b>(N=2432)</b>         |              | <b>(N=2449)</b>         |              |                                |                |
| Primary Outcome: ischemic stroke, MI, or ischemic vascular death analyzed with adjustment for enrolling site                                                    | -                       | -            | -                       | -            | 0.75 (0.60 -- 0.95)            | 0.02           |
| Primary Outcome: ischemic stroke, MI, or ischemic vascular death analyzed with adjustment for age, onset time, evidence of brain infarction, and enrolling site | -                       | -            | -                       | -            | 0.74 (0.59--0.94)              | 0.01           |
| Composite event of ischemic stroke, TIA, MI, or ischemic vascular death                                                                                         | 197                     | 8.1%         | 250                     | 10.2%        | 0.79 (0.65 – 0.95)             | 0.01           |
| Composite of ischemic stroke, MI, all-cause death, or major hemorrhage                                                                                          | 149                     | 6.1%         | 171                     | 7.0%         | 0.87 (0.70 – 1.08)             | 0.21           |
| TIA                                                                                                                                                             | 89                      | 3.7%         | 96                      | 3.9%         | 0.94 (0.70 – 1.26)             | 0.68           |
| Coronary Revascularization (with or without MI)                                                                                                                 | 5                       | 0.2%         | 5                       | 0.2%         | 1.01 (0.29 – 3.48)             | 0.99           |
| Vascular Death                                                                                                                                                  | 9                       | 0.4%         | 6                       | 0.2%         | 1.51 (0.54 – 4.24)             | 0.43           |
| Asymptomatic intracranial hemorrhage (ICH, SAH, SDH or IVH)                                                                                                     | 5                       | 0.2%         | 2                       | 0.1%         | 2.52 (0.49 – 13.00)            | 0.25           |
|                                                                                                                                                                 |                         |              |                         |              | <b>Odds Ratio<br/>(95% CI)</b> |                |
| New handicap/disability defined as 90 day mRS ( $\geq 2$ ) †                                                                                                    | 324                     | 13.3%        | 335                     | 13.7%        | 0.97 (0.82--1.14)              | 0.71*          |
|                                                                                                                                                                 | <b>Median</b>           | <b>IQR</b>   | <b>Median</b>           | <b>IQR</b>   |                                | <b>P Value</b> |
| 90 day mRS <sup>†</sup>                                                                                                                                         | 0                       | 0-1          | 0                       | 0-1          |                                | 0.62**         |

\*p-value is from Wald Chi-squared test of treatment group in a logistic regression of the mRS $\geq 2$

\*\*p value is from a Wilcoxon-Rank sum test

† Missing mRS scores at 90 days were imputed with the mRS score observed at the outcome event visit for 24 (0.5%) patients and with the predicted value from a regression model of 90 day mRS adjusted for baseline age, time from onset to randomization, and evidence of brain

infarct (CT/MRI) for 331 (6.7%) patients.
